# Supplementary material for: A one-pot ultrasound-assisted regio and stereoselective synthesis of indenoquinoxaline engrafted spiropyrrolidines
Source: Royal Society of Chemistry journal article supplement (doi:10.1039/d4ob00288a), 2024-01-01

## **A One-Pot Ultrasound-Assisted Regio and Stereoselective Synthesis of Indenoquinoxaline Engrafted Spiropyrrolidines**

**Ramesh Bokam,<sup>a</sup> Kiran Muniapalle,<sup>a,b</sup> S.Ch.V. Appa Rao Annam,<sup>a</sup> Narayanarao Gundaju,<sup>a</sup> L. Raju Chowhan<sup>c</sup> and Mangala Gowri Ponnappalli<sup>\*a,b</sup>**

*Department of Natural Products and Medicinal Chemistry, CSIR-Indian Institute of Chemical Technology, Hyderabad, 500 007, India*

*Academy of Scientific and Innovative Research (AcSIR), Ghaziabad, 201002, India*

*School of Physical Sciences, Jawaharlal Nehru University, New Delhi, 110067, India*

Email:mangala.iict@gov.in/pmgowri@yahoo.com

## Table of Contents

|                                                                                                                                               |           |
|-----------------------------------------------------------------------------------------------------------------------------------------------|-----------|
| 1. X-ray crystallographic analysis of compound <b>5k</b>                                                                                      | S3        |
| 2. HR-ESIMS, IR, <sup>1</sup> H and <sup>13</sup> C NMR spectra of spiroindeno-quinoxaline pyrrolidines ( <b>5a</b> to <b>5i</b> )            | S4- S21   |
| 3. HSQC, HMBC, NOESY and COSY 2D spectra of spiroindeno-quinoxaline pyrrolidine compound <b>5i</b>                                            | S22 - S26 |
| 4. <sup>1</sup> H and <sup>13</sup> C NMR spectra of spiroindeno-quinoxaline pyrrolidines ( <b>5j</b> to <b>5o</b> ; <b>7a</b> to <b>7h</b> ) | S27 - S54 |

**X-Ray Crystallographic analysis of compound 5k:** Upon repeated crystallisation from chloroform using the vapor diffusion method, needles of **5i** were obtained. The single crystal X-ray diffraction study of a single crystal of **5k** (Crystal size/mm<sup>3</sup> 0.28 × 0.22 × 0.2) was carried out by mounting a single crystal on top of thin glass fibre glued with epoxy glue. The single crystal X-ray diffraction data of the compound **5k** of was collected on Bruker D8 Quest diffractometer equipped with a microfocus anode (MoK $\alpha$ ) (Radiation  $\lambda$  = 0.71073) and a PHOTON 100 CMOS detector. The crystal was kept at 294.0 K during data collection. The data were integrated and scaled using Bruker suite program and the structures were solved by the direct method and then refined by full-matrix least-squares minimization using SHELXL. All the non-hydrogen atoms were refined anisotropically and the hydrogen atoms were placed using calculated position on riding model.

# HR-ESIMS Spectrum of compound 5a

|                      |                    |                    |                    |                   |                                   |                               |                |
|----------------------|--------------------|--------------------|--------------------|-------------------|-----------------------------------|-------------------------------|----------------|
| <b>INSTRUMENT</b>    | <b>UNAVAILABLE</b> | <b>POSITION</b>    | <b>UNAVAILABLE</b> | <b>SAMPLETYPE</b> | <b>UNAVAILABLE</b>                | <b>STATUS</b>                 | <b>Success</b> |
| <b>Inj Vol</b>       | Unavailable        | <b>InjPosition</b> | Unavailable        | <b>SampleType</b> | Unavailable                       | <b>IRM Calibration Status</b> | Success        |
| <b>Data Filename</b> | PMG-H-1.d          | <b>ACQ Method</b>  |                    | <b>Comment</b>    | Sample information is unavailable | <b>Acquired Time</b>          | Unavailable    |

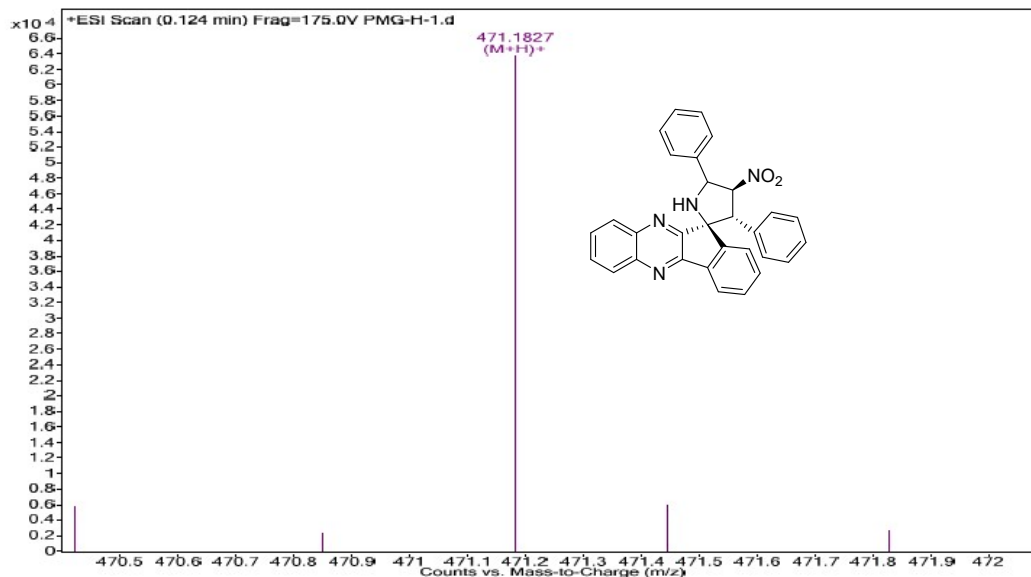

MS Formula Results: + Scan (0.124 min) - PMG-H-1.d (PMG-H-1.d)

| m/z      | Ion                | Formula                                                       | Abundance |
|----------|--------------------|---------------------------------------------------------------|-----------|
| 471.1827 | (M+H) <sup>+</sup> | C <sub>30</sub> H <sub>23</sub> N <sub>2</sub> O <sub>2</sub> | 63888     |

  

| Best | Formula (M)                                                   | Ion Formula                                                   | Calc. m/z | Score | Cross Score | Mass     | Calc. Mass | Diff (ppm) | Abn. Diff (ppm) | Abund. Match | Spacing Match | Mass Match | m/z      | DBE |
|------|---------------------------------------------------------------|---------------------------------------------------------------|-----------|-------|-------------|----------|------------|------------|-----------------|--------------|---------------|------------|----------|-----|
| 7    | C <sub>30</sub> H <sub>23</sub> N <sub>2</sub> O <sub>2</sub> | C <sub>30</sub> H <sub>23</sub> N <sub>2</sub> O <sub>2</sub> | 471.1816  | 44.7  |             | 470.1794 | 470.1740   | -2.48      | 2.48            | 0            | 0             | 80.87      | 471.1827 | 22  |

# IR Spectrum of compound 5a

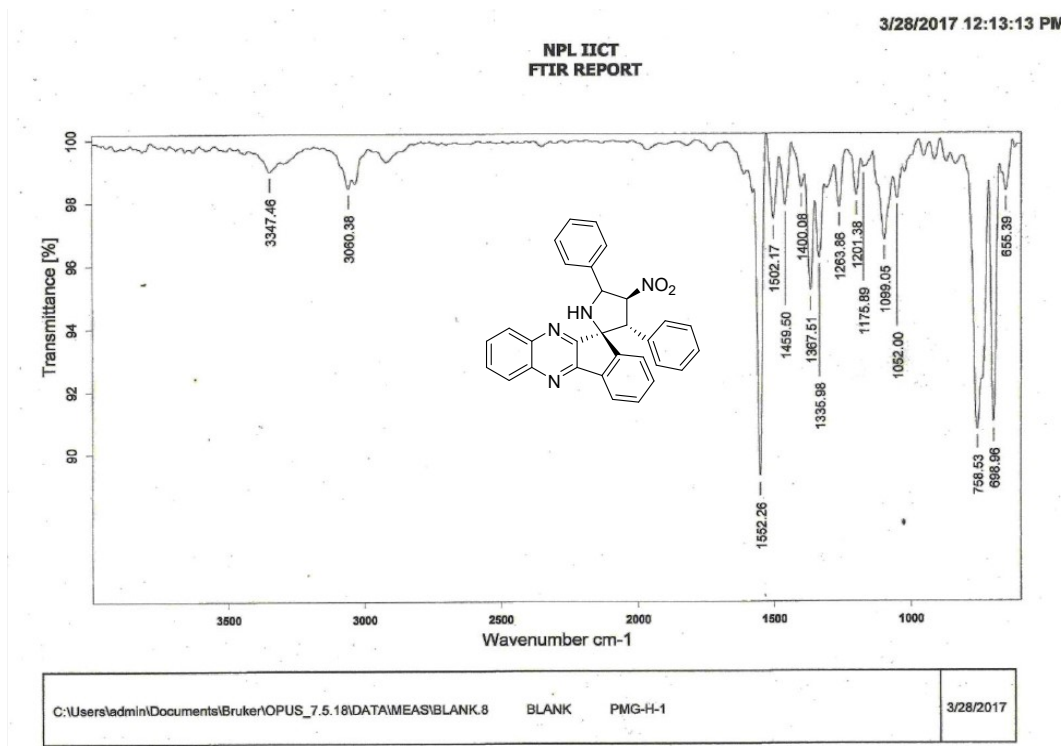

|                                                               |       |         |           |
|---------------------------------------------------------------|-------|---------|-----------|
| C:\Users\admin\Documents\Bruker\OPUS_7.5.18\DATA\MEAS\BLANK.8 | BLANK | PMG-H-1 | 3/28/2017 |
|---------------------------------------------------------------|-------|---------|-----------|

### <sup>1</sup>H NMR Spectrum (CDCl<sub>3</sub>, 500 MHz) of compound 5a

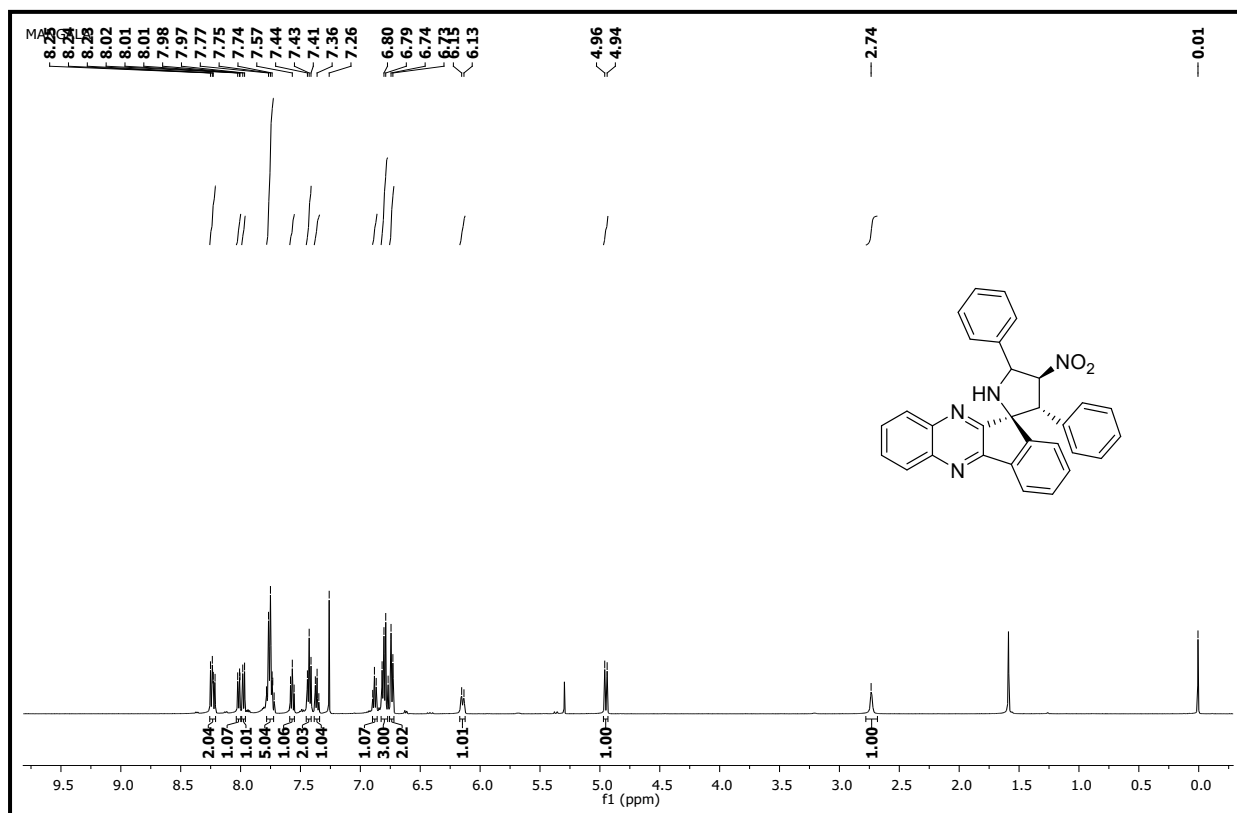

### <sup>13</sup>C NMR Spectrum (CDCl<sub>3</sub>, 125 MHz) of compound 5a

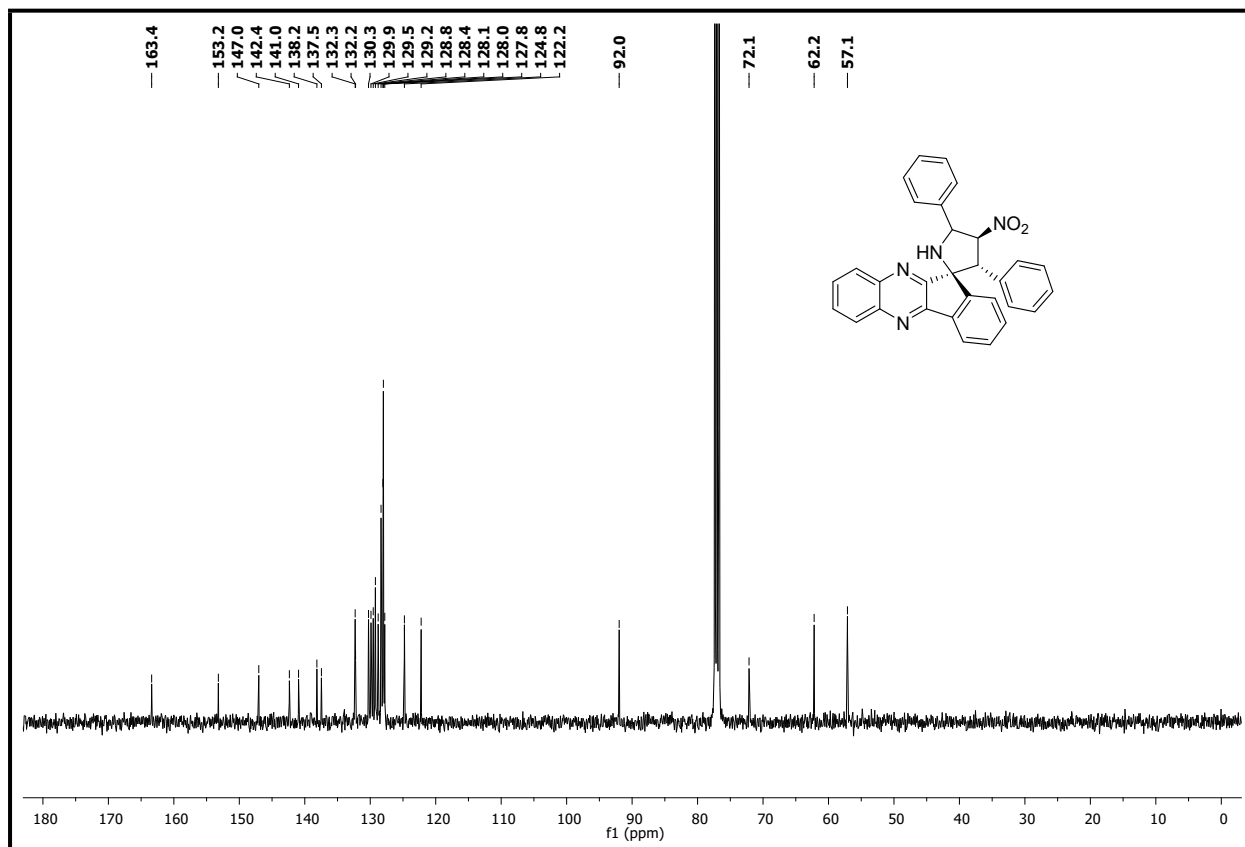

# HR-ESIM Spectrum of compound 5b

**Sample Name:** PMG-ME-1  
**Inj Vol:** -1  
**Data Filename:** PMG-ME-1.d  
**Injection:** InjPosition  
**ACQ Method:** SCS...m  
**Sample Type:** Sample  
**IRM Calibration Status:** Success  
**Acquired Time:** 12/5/2016 2:05:36 PM

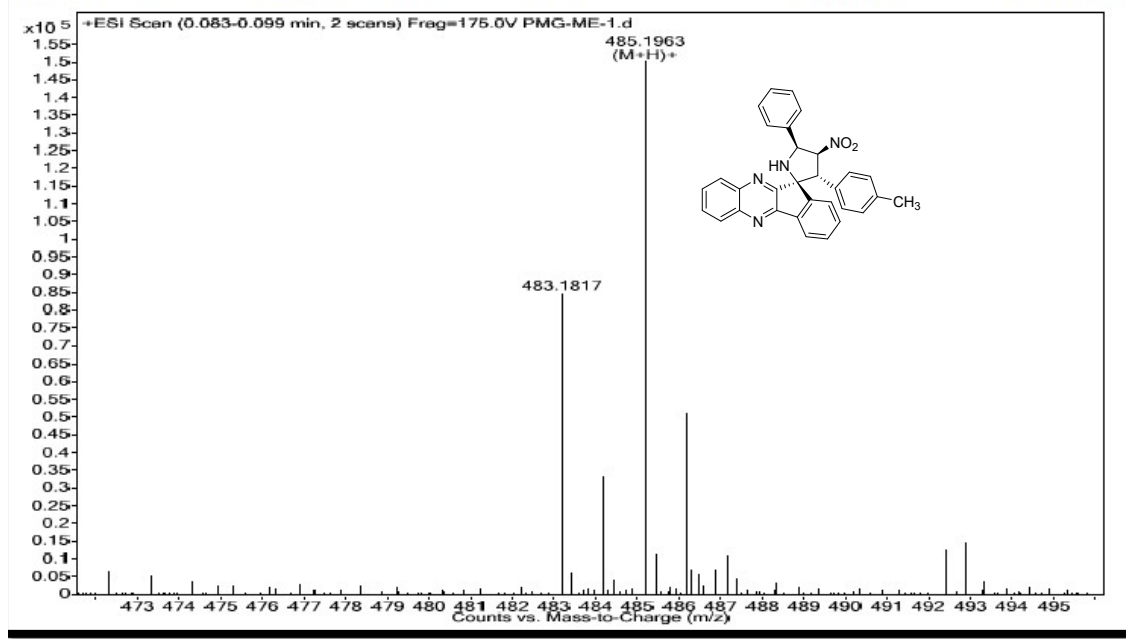

MS Formula Results: + Scan (0.083-0.099 min) - PMG-ME-1.d (PMG-ME-1.d)

| m/z      | Ion    | Formula    | Abundance |
|----------|--------|------------|-----------|
| 485.1963 | (M+H)+ | C31H25N4O2 | 149969.9  |

  

| Best | Formula (M) | Ion Formula | Calc. m/z | Score | Cross Score | Mass     | Calc. Mass | Diff (ppm) | Abs Diff (ppm) | Abund. Match | Spacing Match | Mass Match | m/z      | DBE |
|------|-------------|-------------|-----------|-------|-------------|----------|------------|------------|----------------|--------------|---------------|------------|----------|-----|
| ✓    | C31H24N4O2  | C31H25N4O2  | 485.1972  | 96.56 |             | 484.1891 | 484.1899   | 1.71       | 1.71           | 98.13        | 93.85         | 96.97      | 485.1963 | 22  |

# IR Spectrum of compound 5b

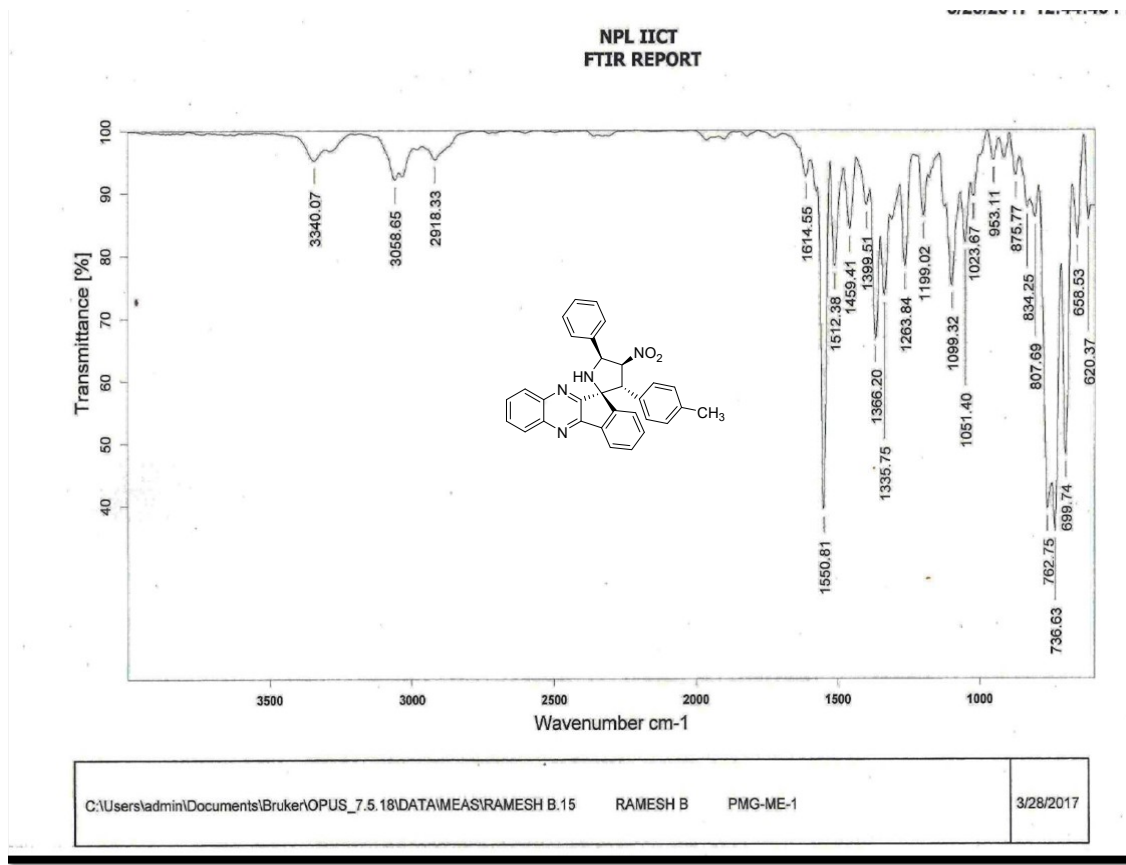

C:\Users\admin\Documents\Bruker\OPUS\_7.5.18\DATA\MEAS\RAMESH B.15 RAMESH B PMG-ME-1 3/28/2017

### <sup>1</sup>H NMR Spectrum (CDCl<sub>3</sub>, 500 MHz) of compound 5b

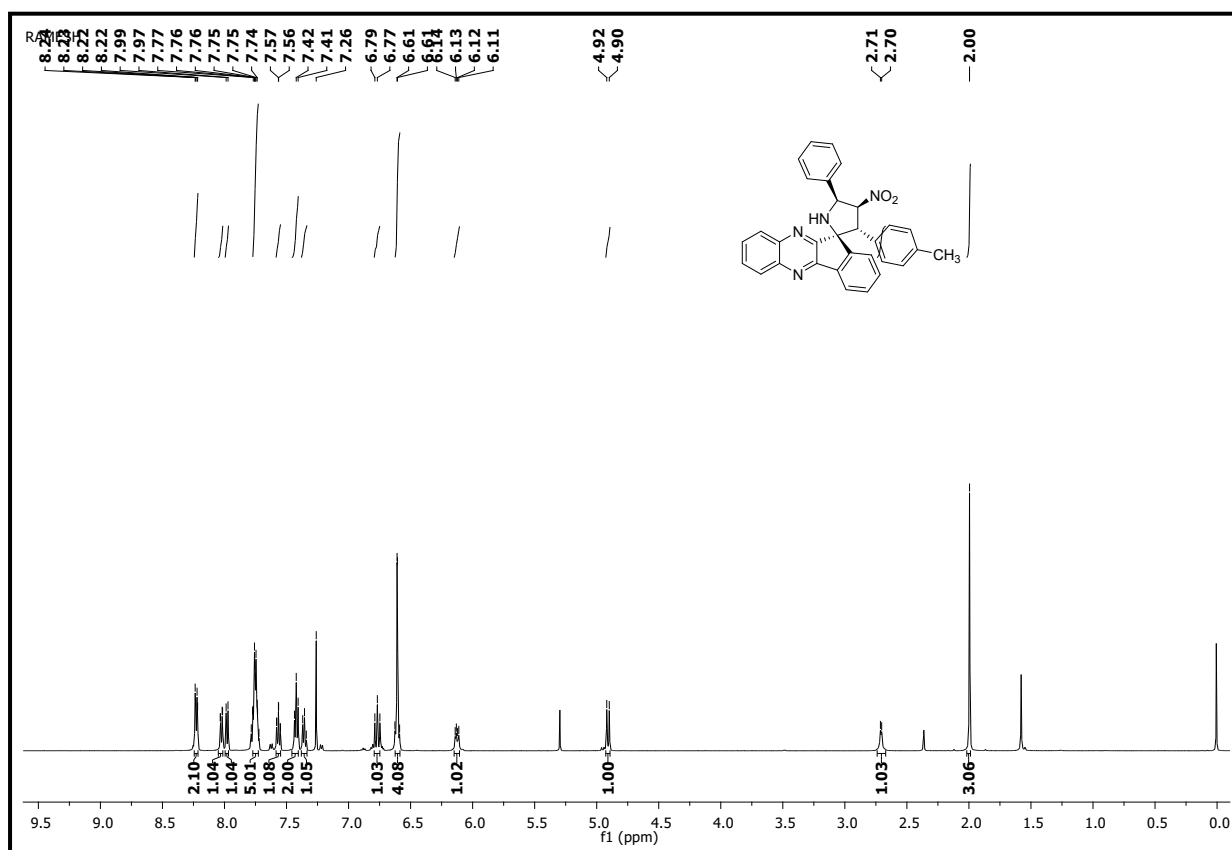

### <sup>13</sup>C NMR Spectrum (CDCl<sub>3</sub>, 125 MHz) of compound 5b

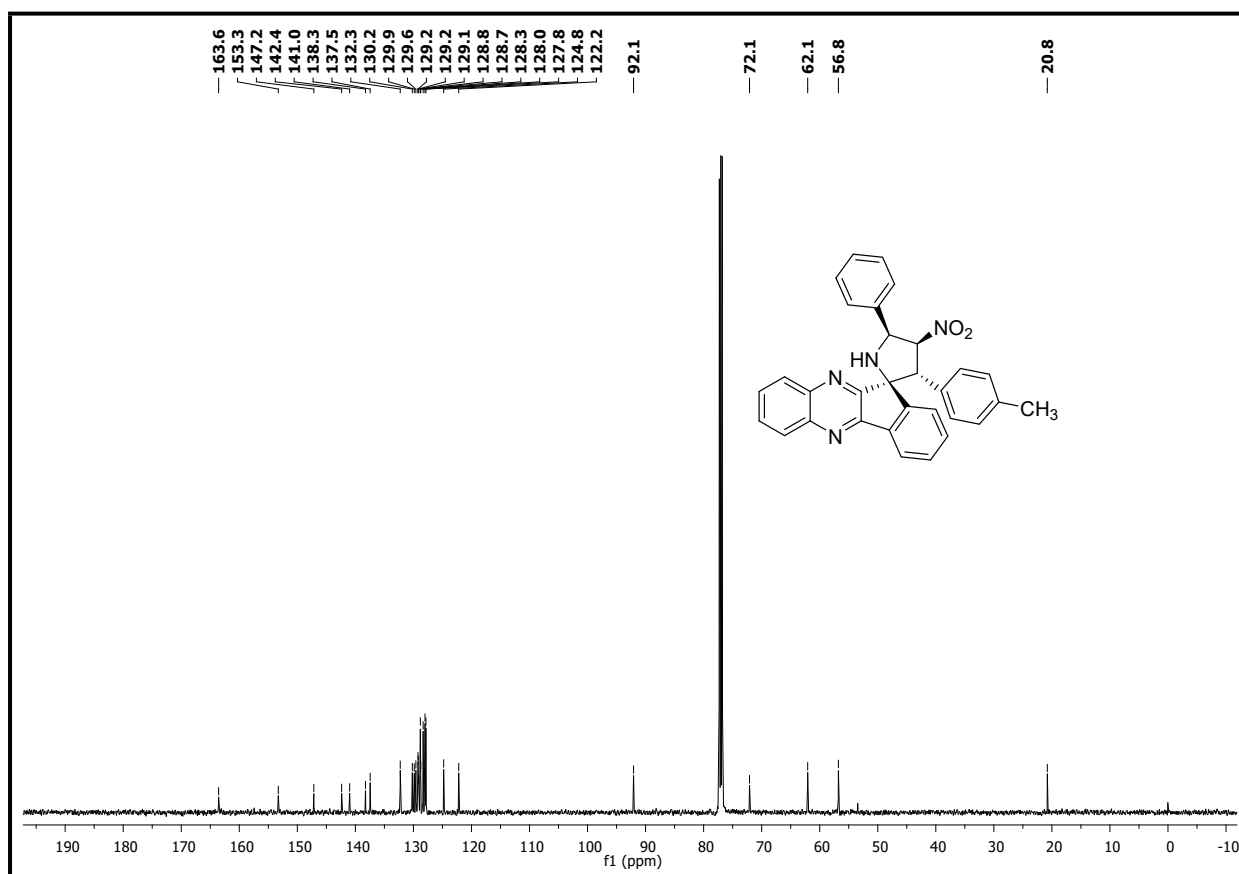



## HR-ESIM Spectrum of compound 5c

|               |             |             |          |                 |              |                        |                     |
|---------------|-------------|-------------|----------|-----------------|--------------|------------------------|---------------------|
| Sample Name   | PMG-DME-1   | Position    | Vial 50  | Instrument Name | Instrument 1 | User Name              |                     |
| Inj Vol       | -1          | InjPosition |          | SampleType      | Sample       | IRM Calibration Status | Success             |
| Data Filename | PMG-DME-1.d | ACQ Method  | SCS....m | Comment         |              | Acquired Time          | 12/5/2016 3:33:49 P |

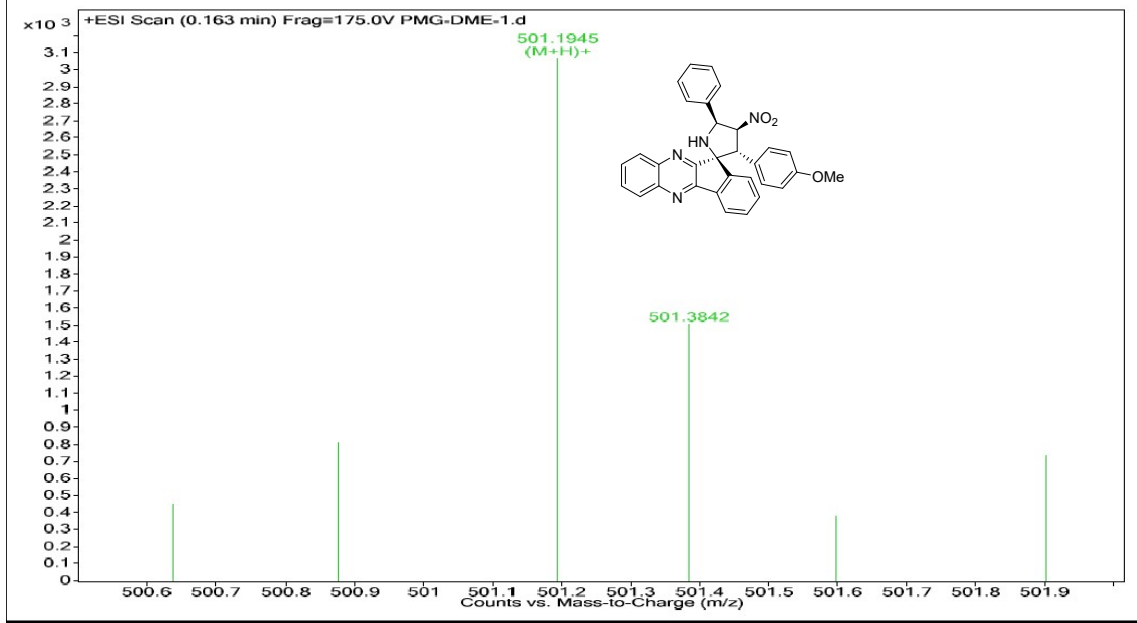

MS Formula Results: + Scan (0.163 min) (PMG-DME-1.d)

| m/z      | Ion                | Formula                                                       | Abundance |
|----------|--------------------|---------------------------------------------------------------|-----------|
| 501.1945 | (M+H) <sup>+</sup> | C <sub>31</sub> H <sub>25</sub> N <sub>4</sub> O <sub>3</sub> | 3065.7    |

  

| Best | Formula (M)                                                   | Ion Formula                                                   | Calc m/z | Score | Cross Score | Mass     | Calc Mass | Diff (ppm) | Abs Diff (ppm) | Abund Match | Spacing Match | Mass Match | m/z      | DBE |
|------|---------------------------------------------------------------|---------------------------------------------------------------|----------|-------|-------------|----------|-----------|------------|----------------|-------------|---------------|------------|----------|-----|
| ✓    | C <sub>31</sub> H <sub>24</sub> N <sub>4</sub> O <sub>3</sub> | C <sub>31</sub> H <sub>25</sub> N <sub>4</sub> O <sub>3</sub> | 501.1921 | 82.06 |             | 500.1873 | 500.1848  | -5.01      | 5.01           | 65.75       | 29.41         | 76.18      | 501.1945 | 22  |

## IR Spectrum of compound 5c

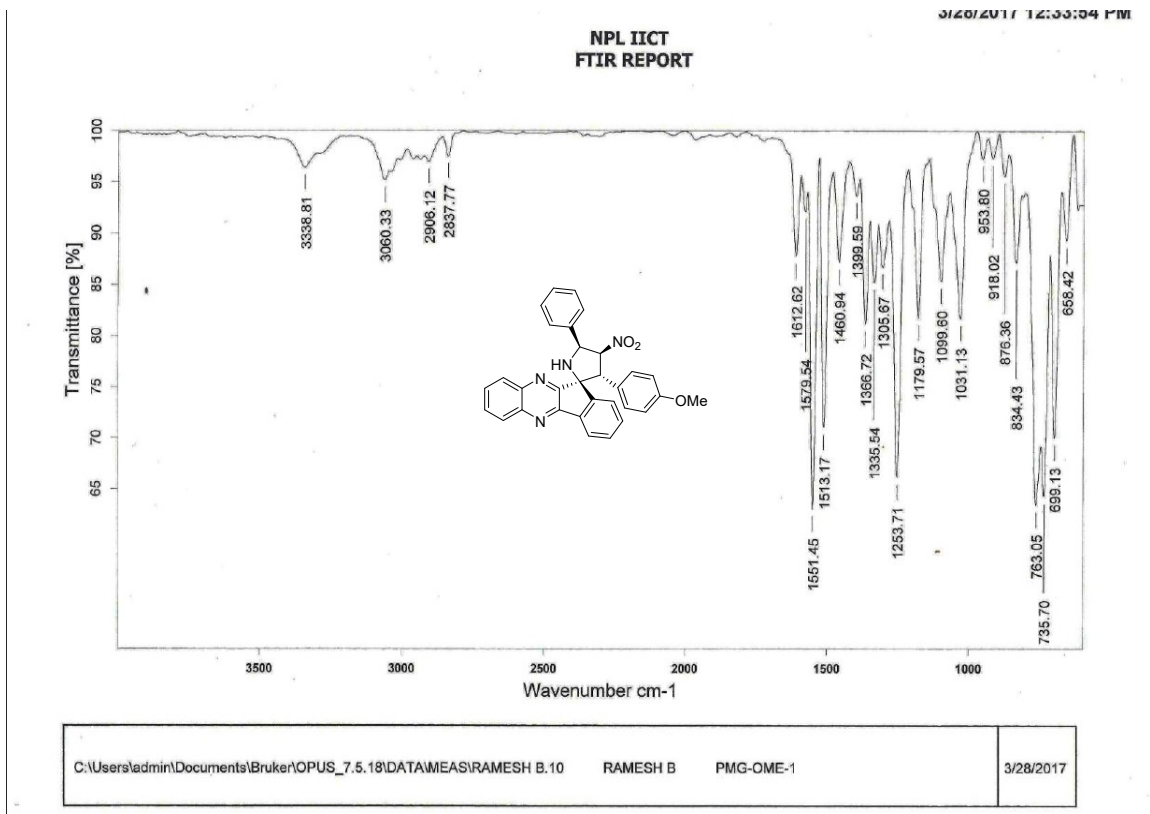

**<sup>1</sup>H NMR Spectrum (CDCl<sub>3</sub>, 500 MHz) of compound 5c**

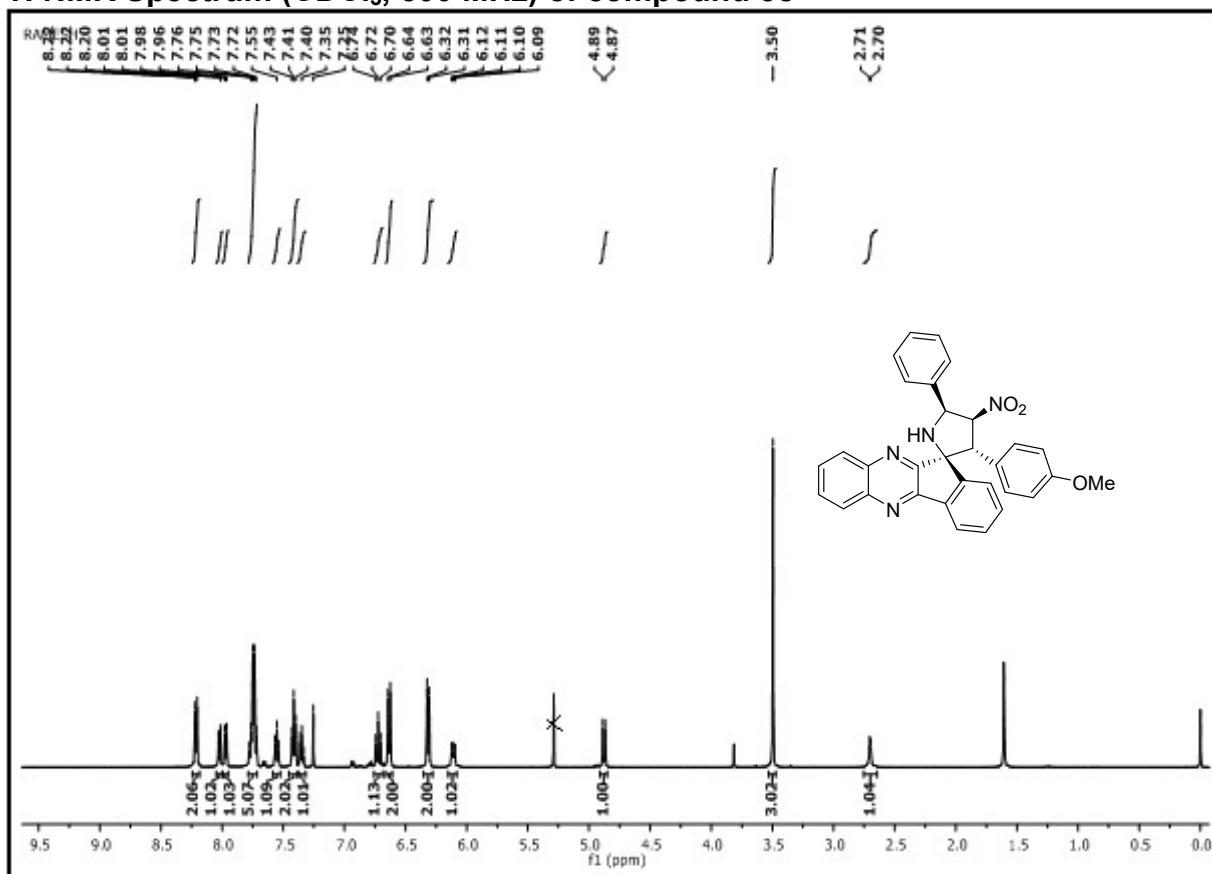

**<sup>13</sup>C NMR Spectrum (CDCl<sub>3</sub>, 125 MHz) of compound 5c**

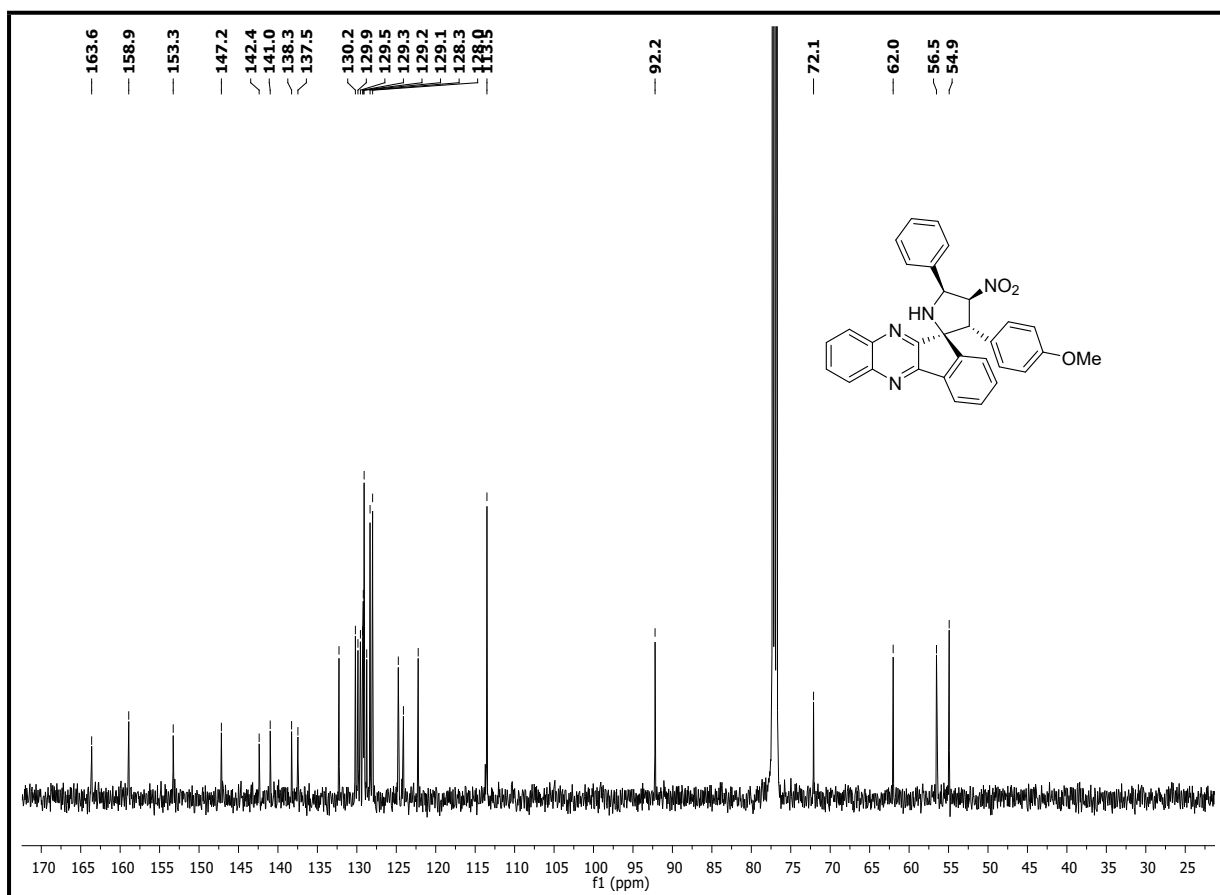

## HR-ESIM Spectrum of compound 5d

**Sample Name** PMG-BR-1      **Position** Vial 11      **Instrument Name** Instrument 1      **User Name**  
**Inj Vol** 0.5      **InjPosition**      **SampleType** Sample      **IRM Calibration Status** Success  
**Data Filename** PMG-BR-1.d      **ACQ Method**      **Comment**      **Acquired Time** 12/2/2016 4:22:33 PM

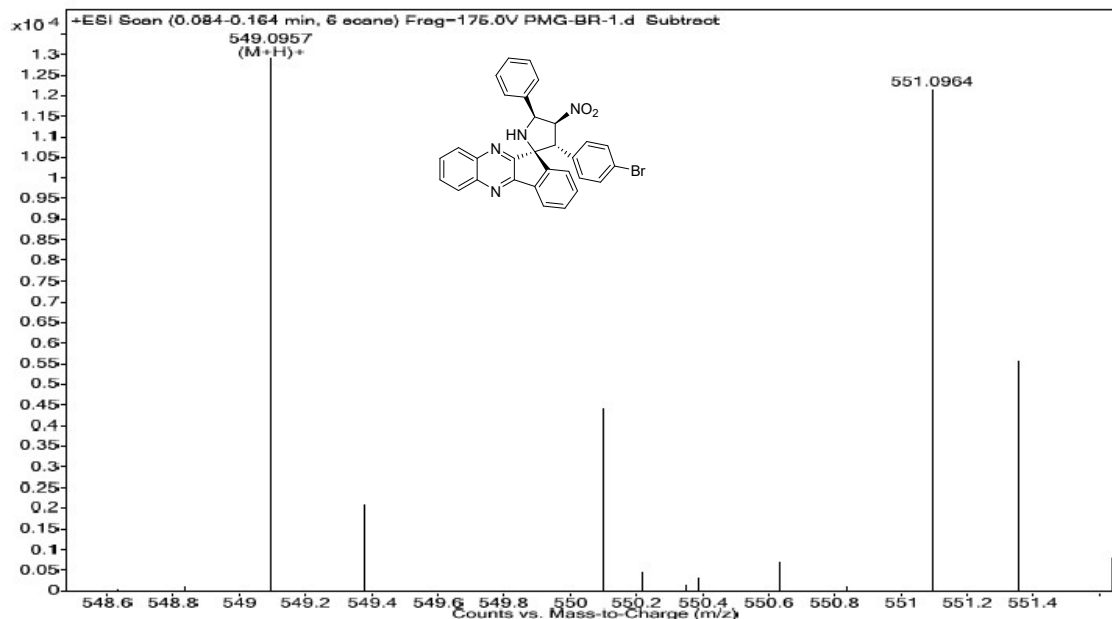

MS Formula Results: + Scan (0.084-0.164 min) Sub - PMG-BR-1.d (PMG-BR-1.d)

| m/z      | Ion                | Formula                                                         | Abundance |
|----------|--------------------|-----------------------------------------------------------------|-----------|
| 549.0957 | (M+H) <sup>+</sup> | C <sub>30</sub> H <sub>22</sub> BrN <sub>4</sub> O <sub>2</sub> | 12879.7   |

  

| Best | Formula (M)                                                     | Ion Formula                                                     | Calc m/z | Score | Cross Score | Mass     | Calc Mass | Diff (ppm) | Abn Diff (ppm) | Abund Match | Spacing Match | Mass Match | m/z      | DBE |
|------|-----------------------------------------------------------------|-----------------------------------------------------------------|----------|-------|-------------|----------|-----------|------------|----------------|-------------|---------------|------------|----------|-----|
| 1    | C <sub>30</sub> H <sub>21</sub> BrN <sub>4</sub> O <sub>2</sub> | C <sub>30</sub> H <sub>22</sub> BrN <sub>4</sub> O <sub>2</sub> | 549.0921 | 99.97 |             | 549.0929 | 549.0940  | -9.91      | 9.91           | 99.03       | 81.41         | 42.11      | 549.0957 | 22  |

## IR Spectrum of compound 5d

3/28/2017 12:22:26 PM

**NPL IICT  
FTIR REPORT**

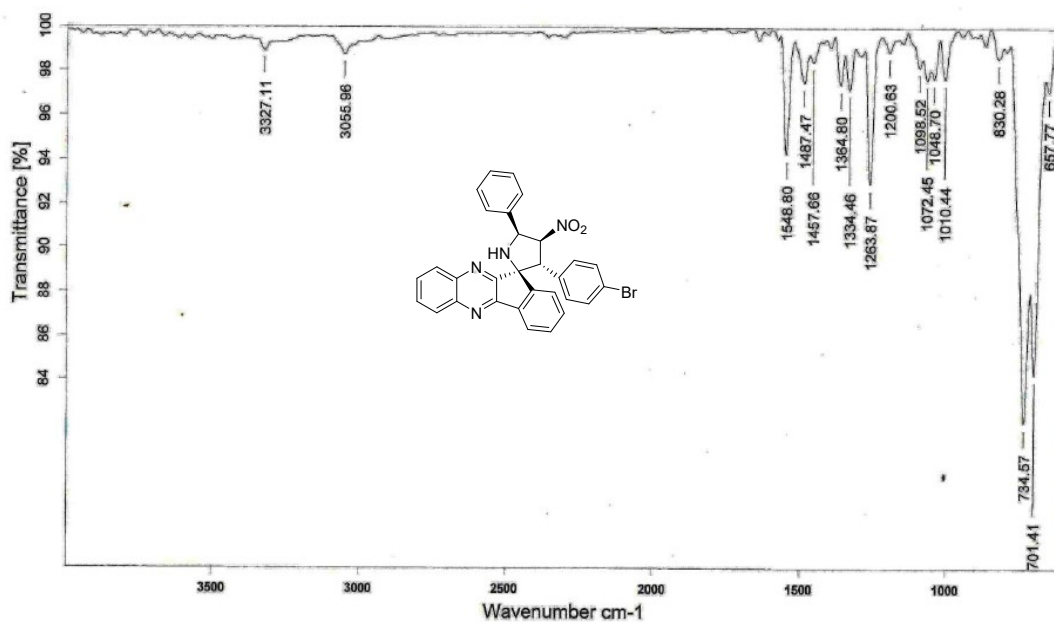

C:\Users\admin\Documents\Bruker\OPUS\_7.5.18\DATA\MEAS\RAMESH B.4      RAMESH B      PMG-BR1

3/28/2017

### <sup>1</sup>H NMR Spectrum (CDCl<sub>3</sub>, 400 MHz) of compound 5d

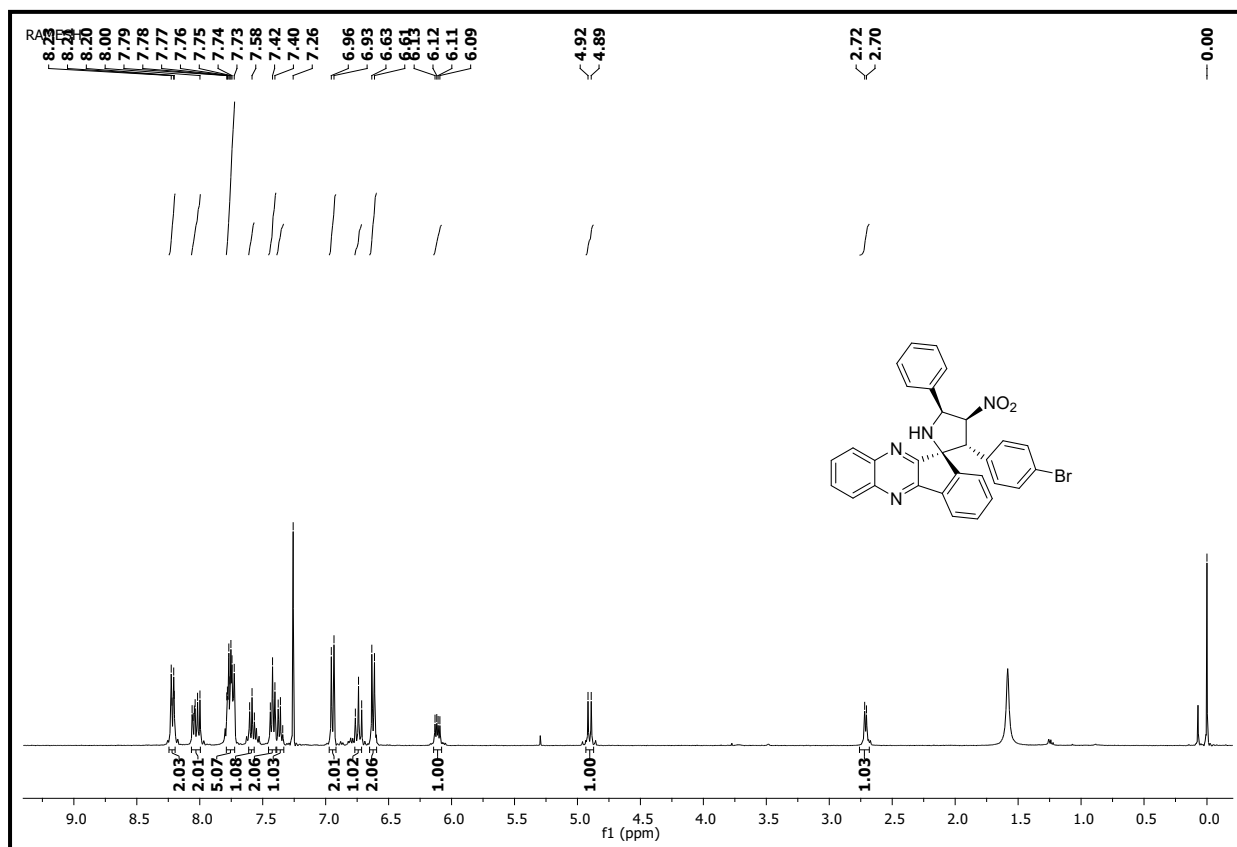

### <sup>13</sup>C NMR Spectrum (CDCl<sub>3</sub>, 100 MHz) of compound 5d

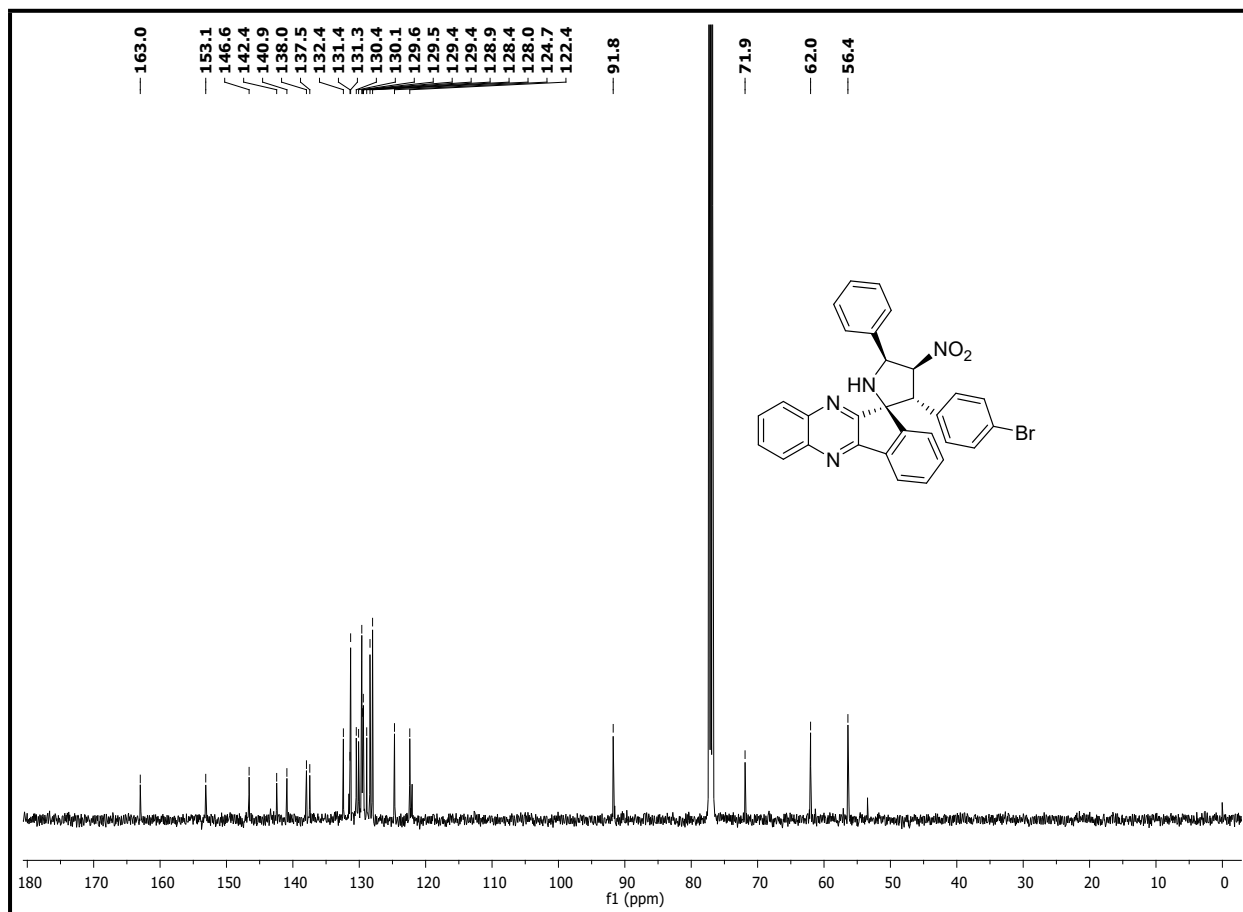

## HR-ESIM Spectrum of compound 5e

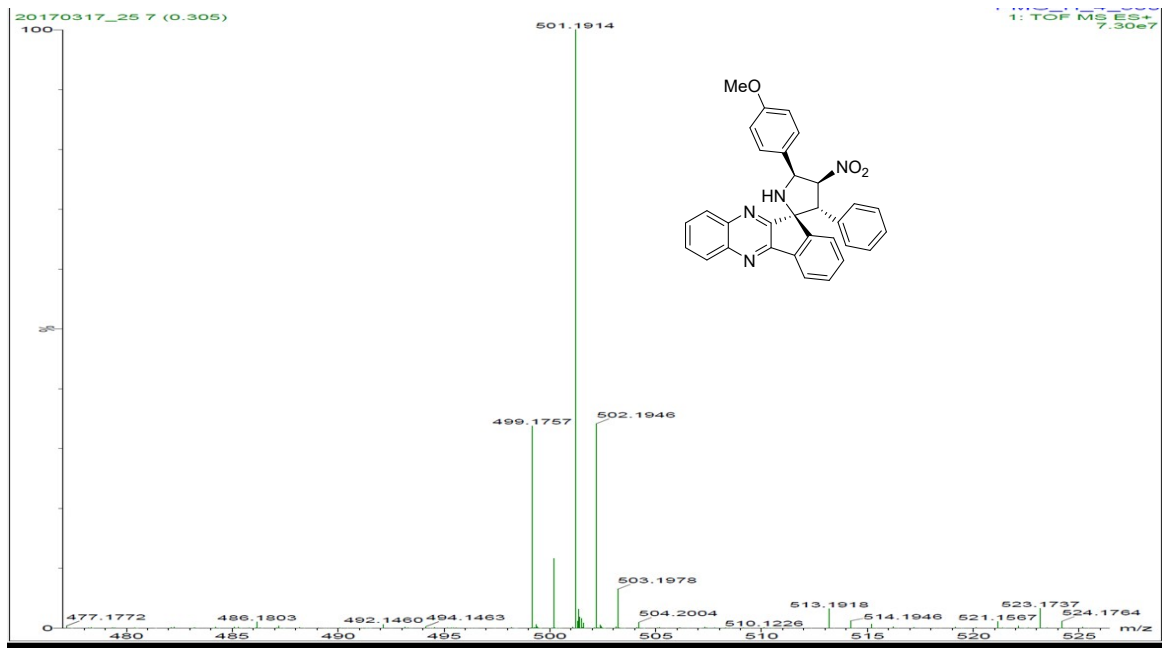

21 formula(e) evaluated with 1 results within limits (up to 50 closest results for each mass)

Elements Used:

C: 0-31 H: 0-25 N: 0-4 O: 0-3 Na: 0-1

20170317\_25 7 (0.305)

PMG\_H\_4\_500

1: TOF MS ES+

7.30e+07

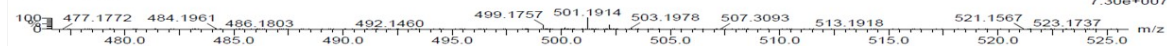

Minimum:

Maximum:

| Mass     | Calc. Mass | mDa  | PPM  | DBE  | i-FIT | Norm | Conf(%) | Formula       |
|----------|------------|------|------|------|-------|------|---------|---------------|
| 501.1914 | 501.1927   | -1.3 | -2.6 | 21.5 | 491.9 | n/a  | n/a     | C31 H25 N4 O3 |

501.1914 501.1927 -1.3 -2.6 21.5 491.9 n/a n/a C31 H25 N4 O3

## IR Spectrum of compound 5e

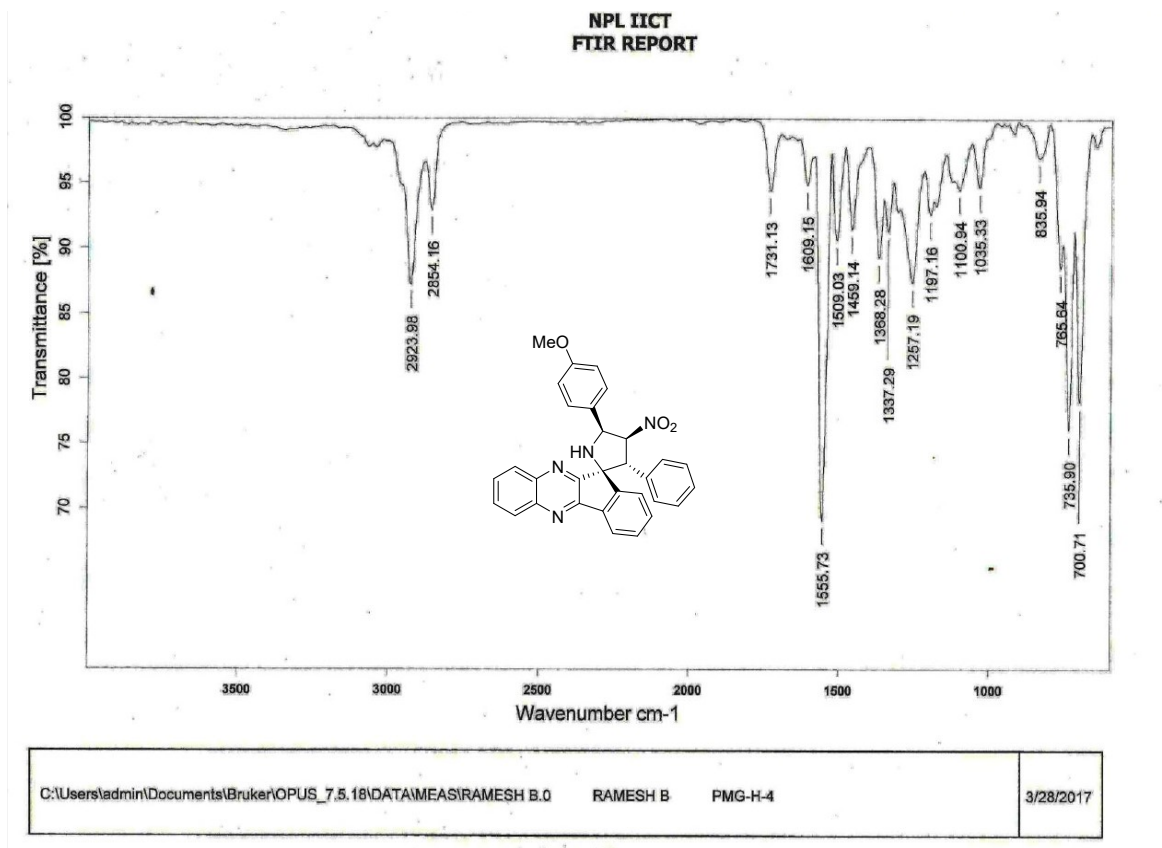

### <sup>1</sup>H NMR Spectrum (CDCl<sub>3</sub>, 400 MHz) of compound 5e

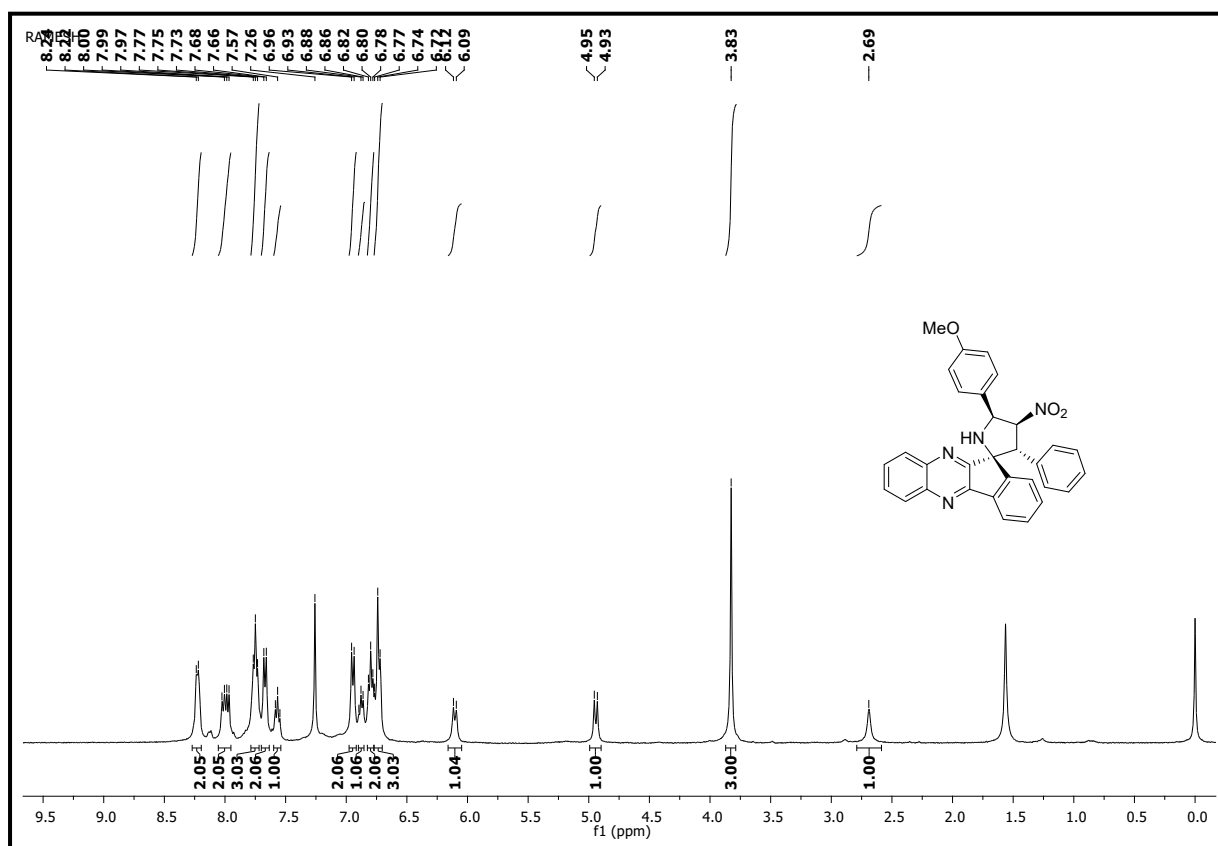

### <sup>13</sup>C NMR Spectrum (CDCl<sub>3</sub>, 100 MHz) of compound 5e

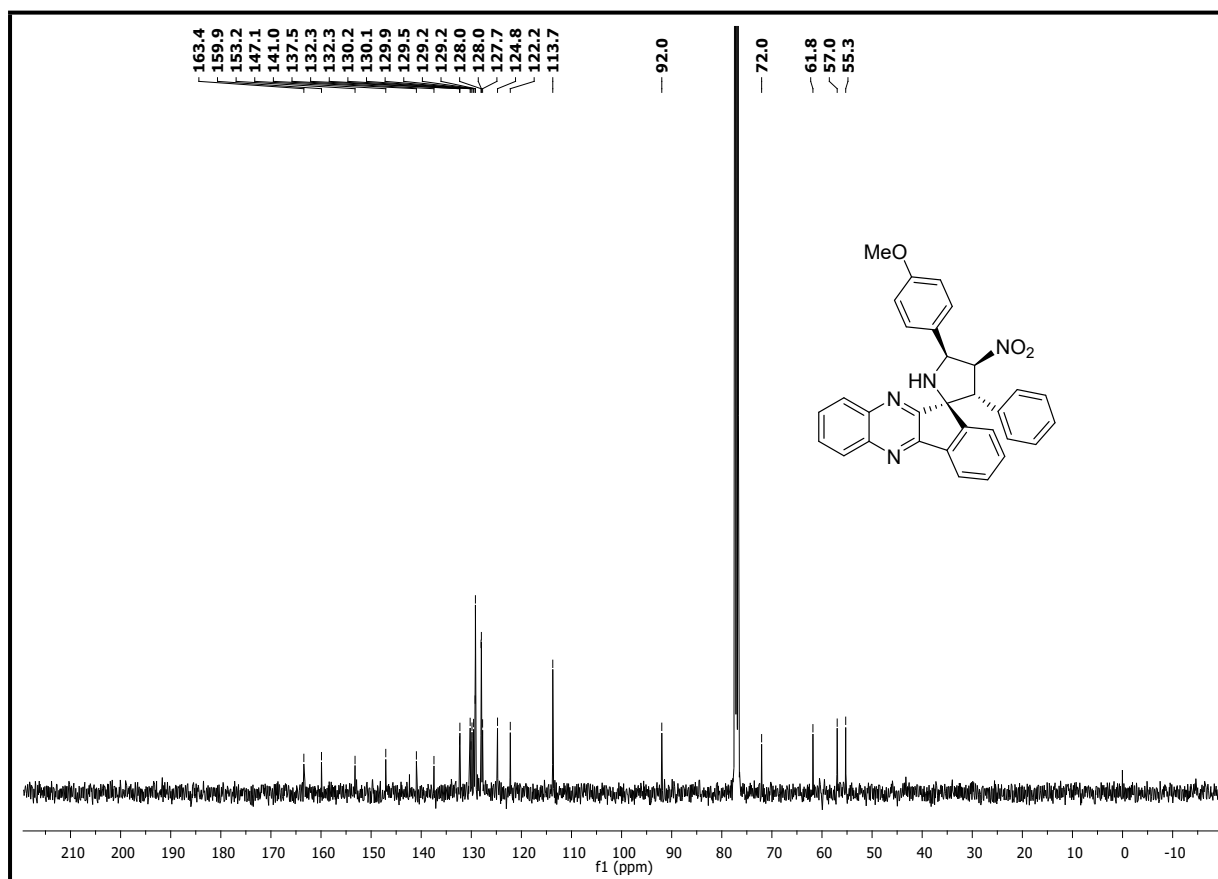

## HR-ESIM Spectrum of compound 5f

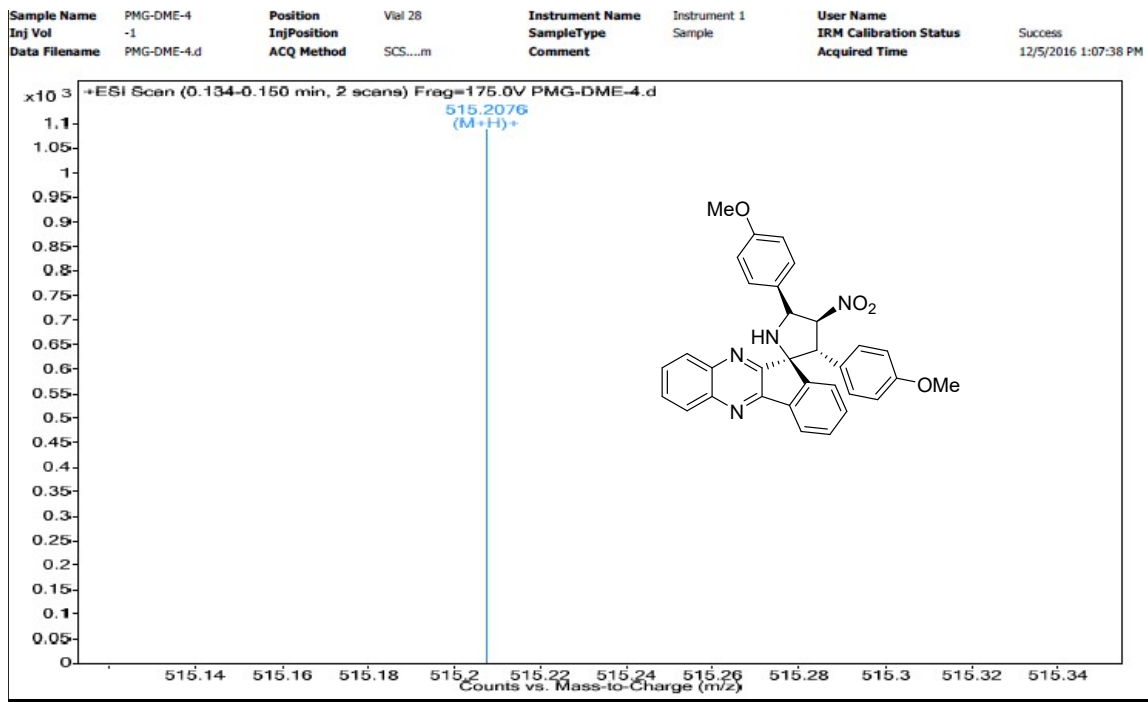

MS Formula Results: + Scan (0.134-0.150 min) (PMG-DME-4.d)

| m/z      | Ion                | Formula                                                       | Abundance |
|----------|--------------------|---------------------------------------------------------------|-----------|
| 515.2076 | (M+H) <sup>+</sup> | C <sub>32</sub> H <sub>27</sub> N <sub>4</sub> O <sub>3</sub> | 1086.9    |

  

| Best | Formula (M)                                                   | Ion Formula                                                   | Calc. m/z | Score | Cross Score | Mass     | Calc. Mass | Diff (ppm) | Abs Diff (ppm) | Abund Match | Spacing Match | Mass Match | m/z      | DBE |
|------|---------------------------------------------------------------|---------------------------------------------------------------|-----------|-------|-------------|----------|------------|------------|----------------|-------------|---------------|------------|----------|-----|
| ✓    | C <sub>32</sub> H <sub>26</sub> N <sub>4</sub> O <sub>3</sub> | C <sub>32</sub> H <sub>27</sub> N <sub>4</sub> O <sub>3</sub> | 515.2078  | 47.53 |             | 514.2003 | 514.2005   | 0.4        | 0.4            | 0           | 0             | 99.82      | 515.2076 | 22  |

## IR Spectrum of compound 5f

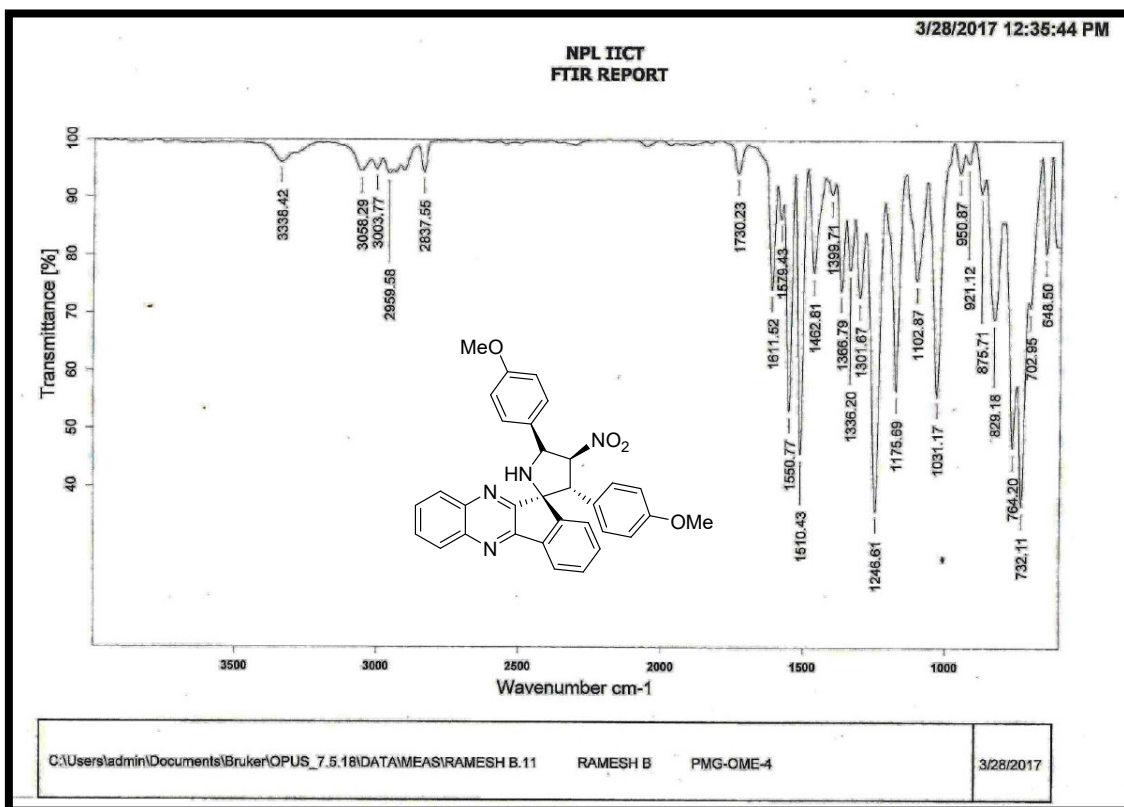

### <sup>1</sup>H NMR Spectrum (CDCl<sub>3</sub>, 400 MHz) of compound 5f

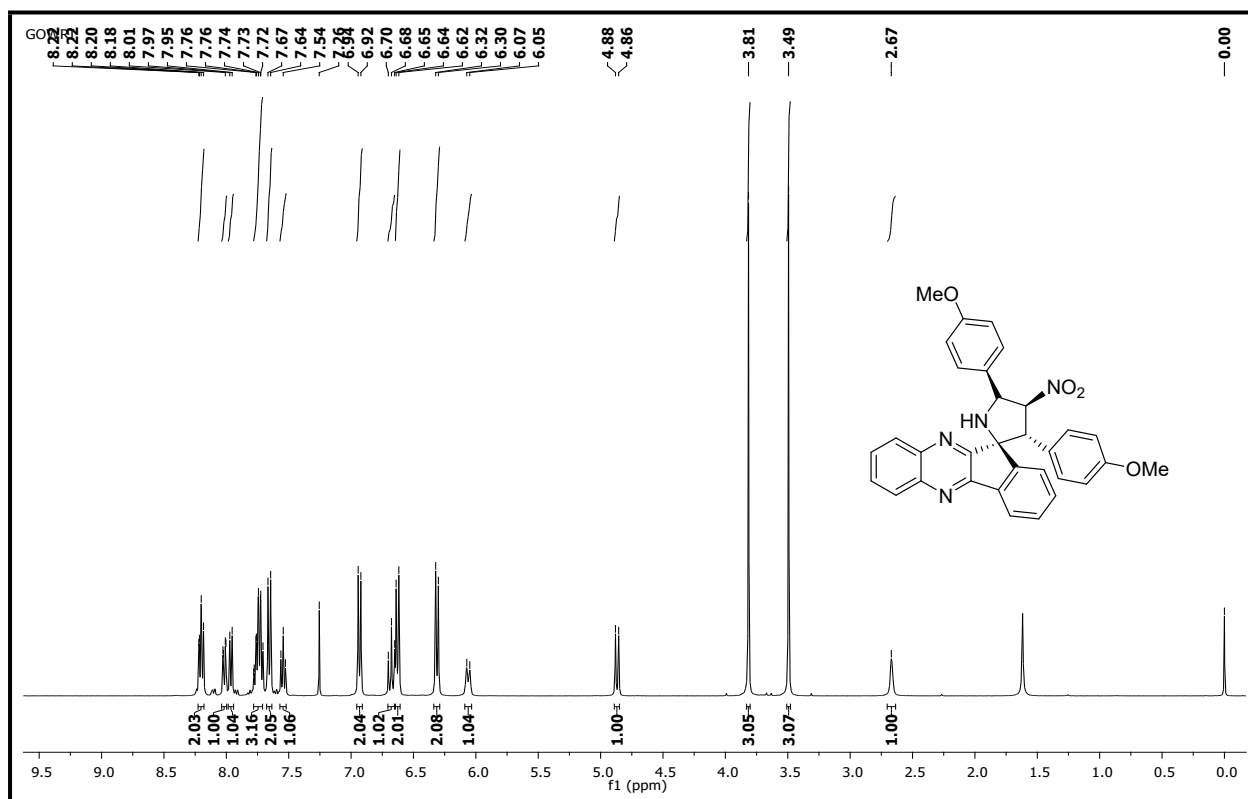

### <sup>13</sup>C NMR Spectrum (CDCl<sub>3</sub>, 100 MHz) of compound 5f

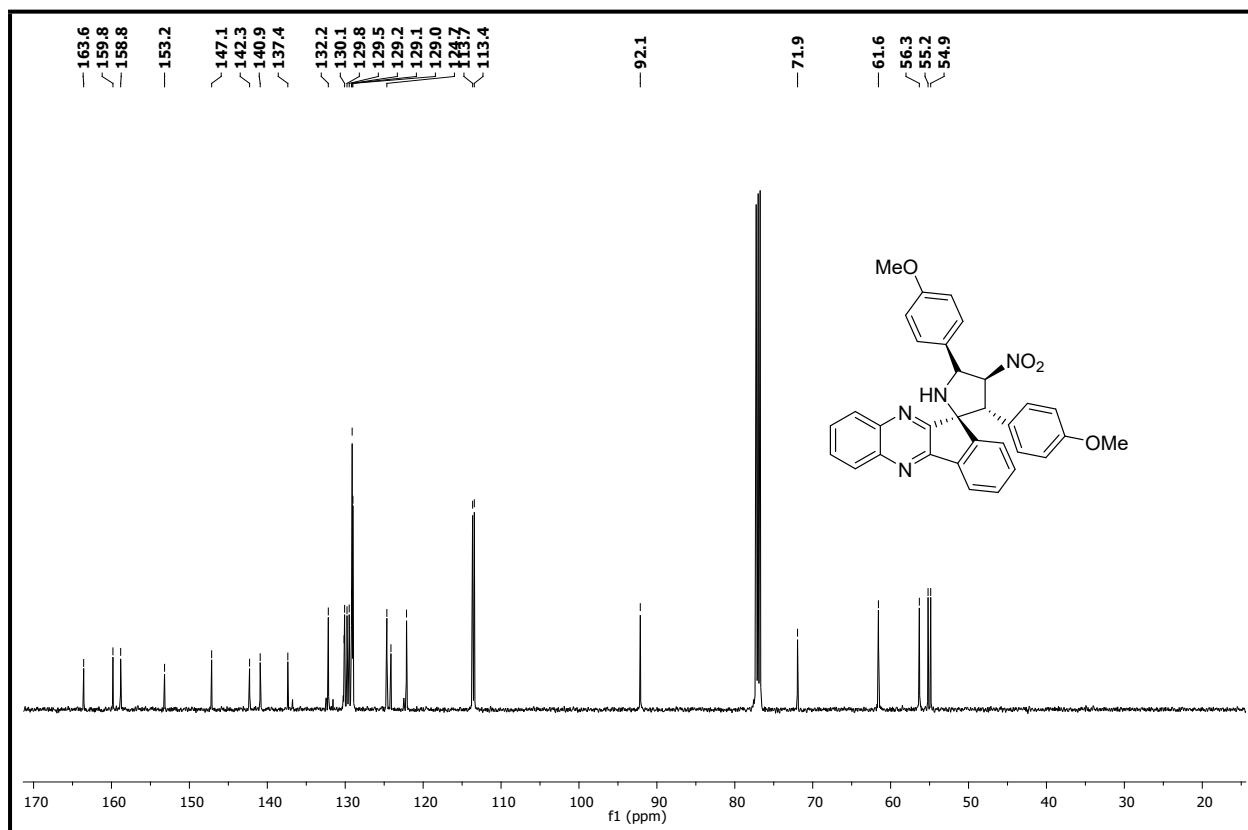



## HR-ESIM Spectrum of compound 5g

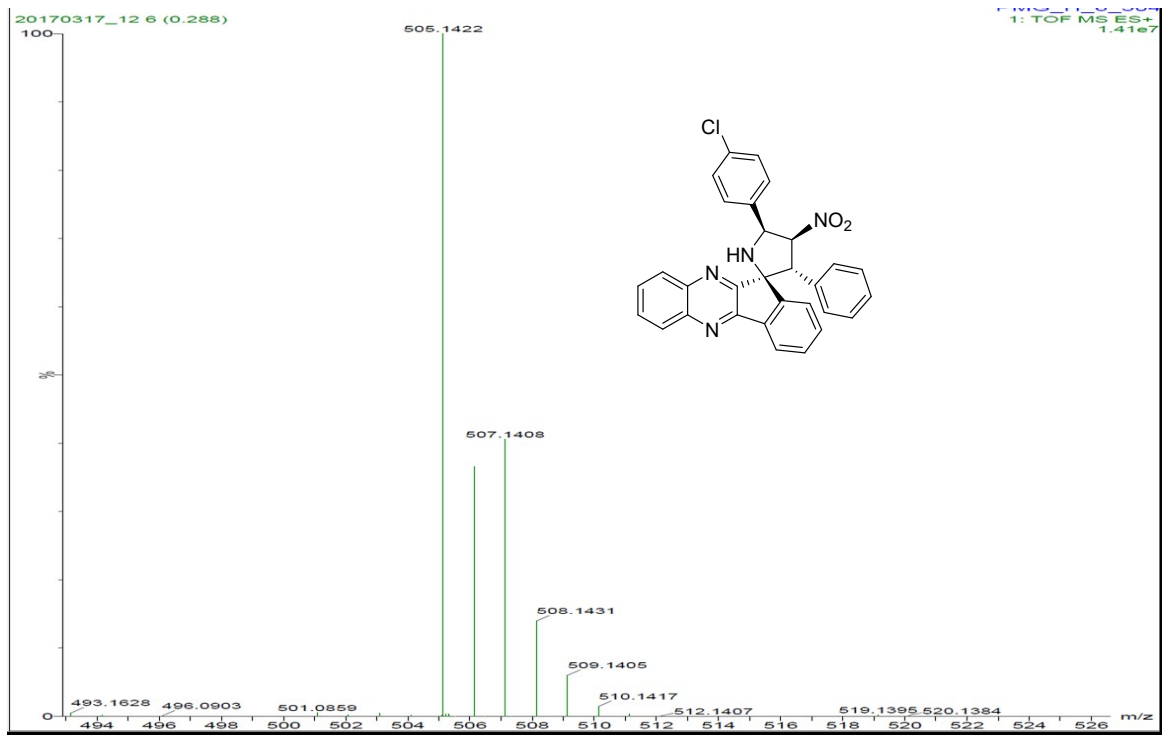

29 formula(e) evaluated with 1 results within limits (up to 50 closest results for each mass)

Elements Used:

C: 0-30 H: 0-22 N: 0-4 O: 0-2 Cl: 0-2

20170317\_12 6 (0.288)

1: TOF MS ES+

PMG\_H\_6\_504

| Mass     | Calc. Mass | mDa  | PPM  | DBE  | i-FIT | Norm | Conf (%) | Formula          |
|----------|------------|------|------|------|-------|------|----------|------------------|
| 505.1422 | 505.1431   | -0.9 | -1.8 | 31.5 | 122.2 | n/a  | n/a      | C30 H22 N4 O2 Cl |

## IR Spectrum of compound 5g

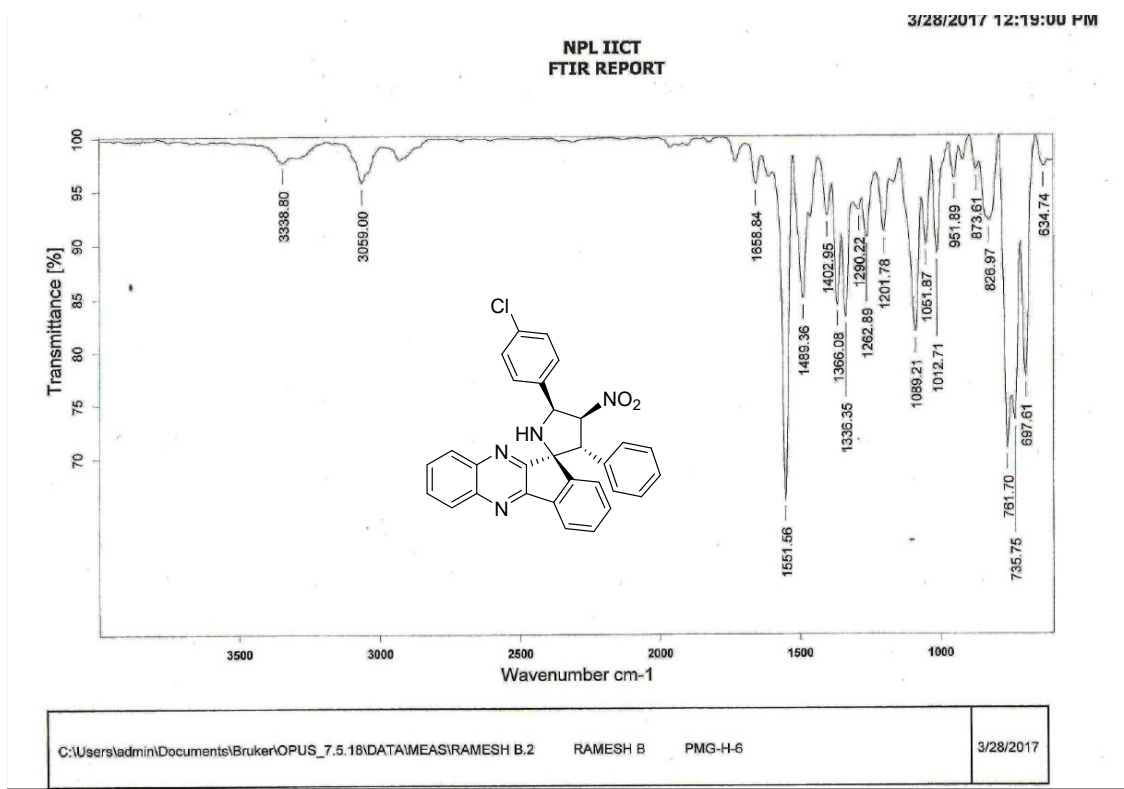

**<sup>1</sup>H NMR Spectrum (CDCl<sub>3</sub>, 500 MHz) of compound 5g**

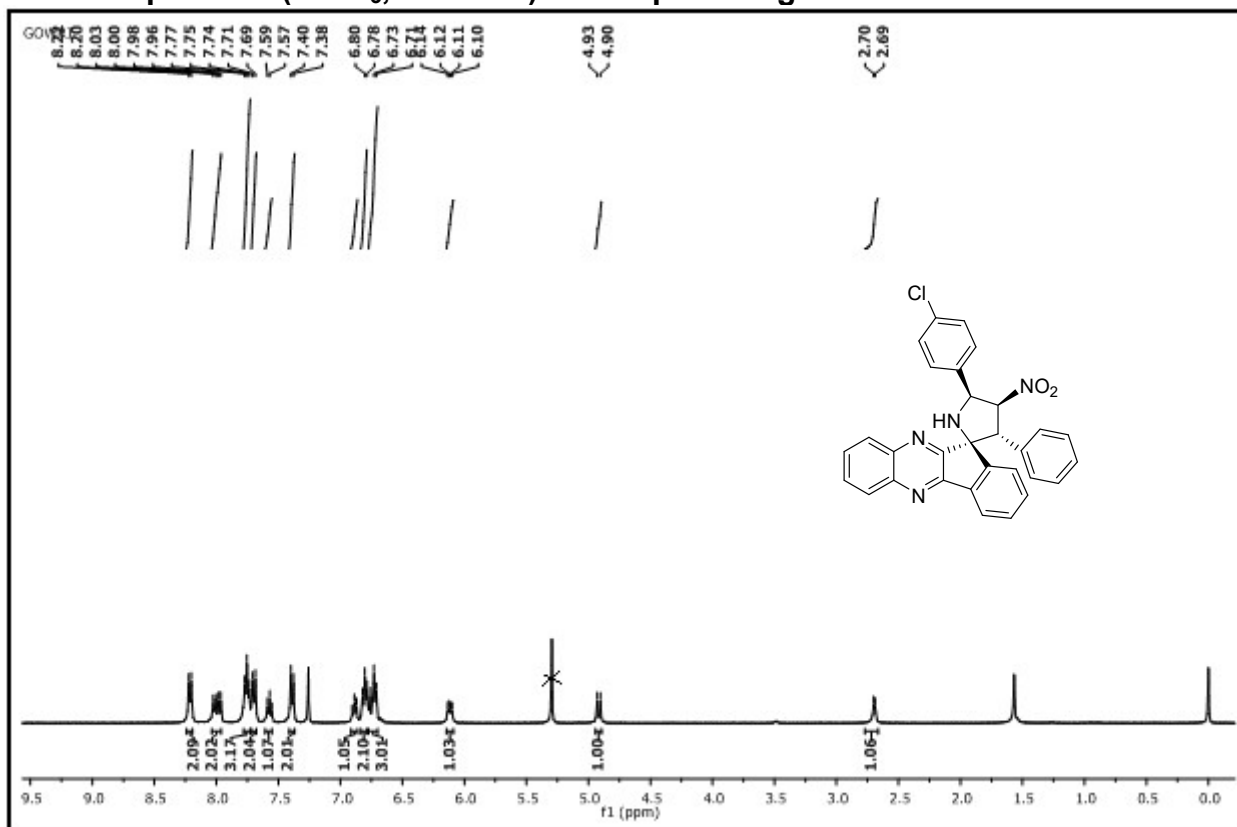

**<sup>13</sup>C NMR Spectrum (CDCl<sub>3</sub>, 100 MHz) of compound 5g**

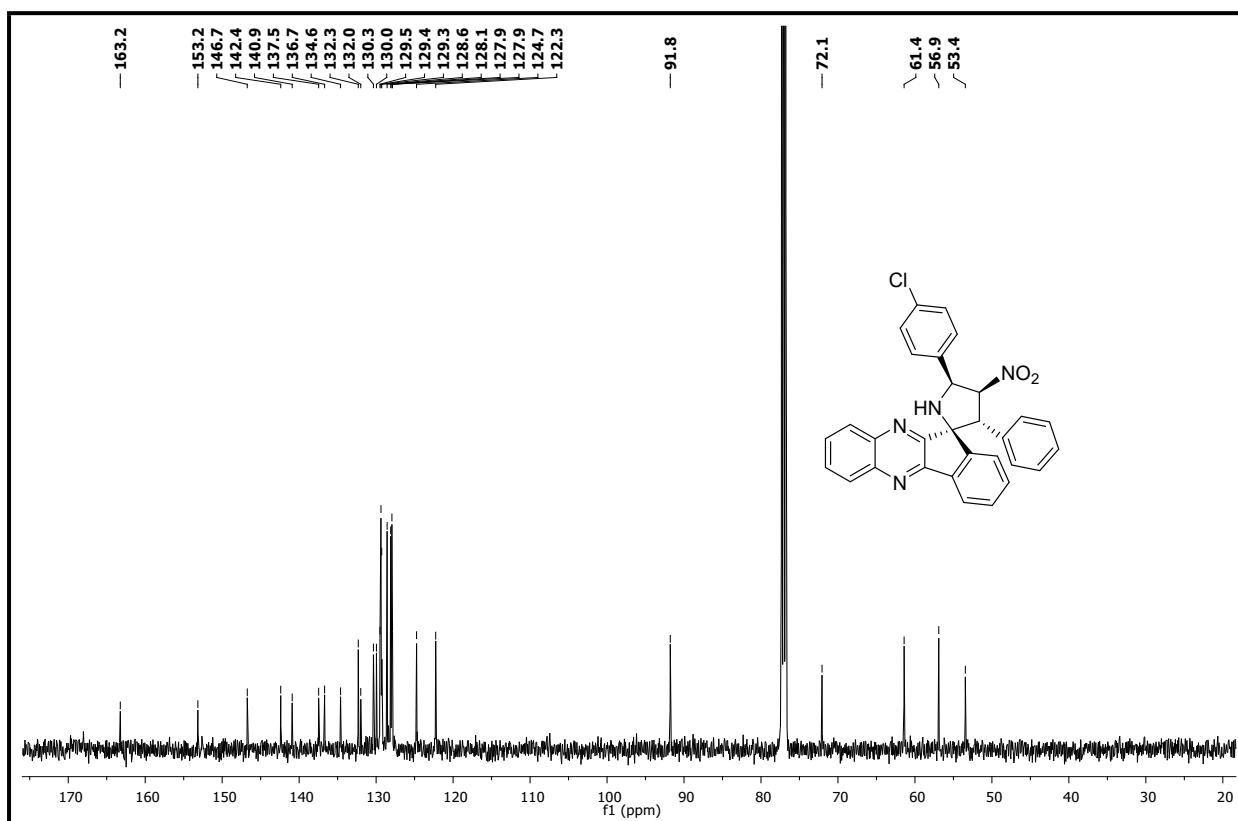

## HR-ESIM Spectrum of compound 5h

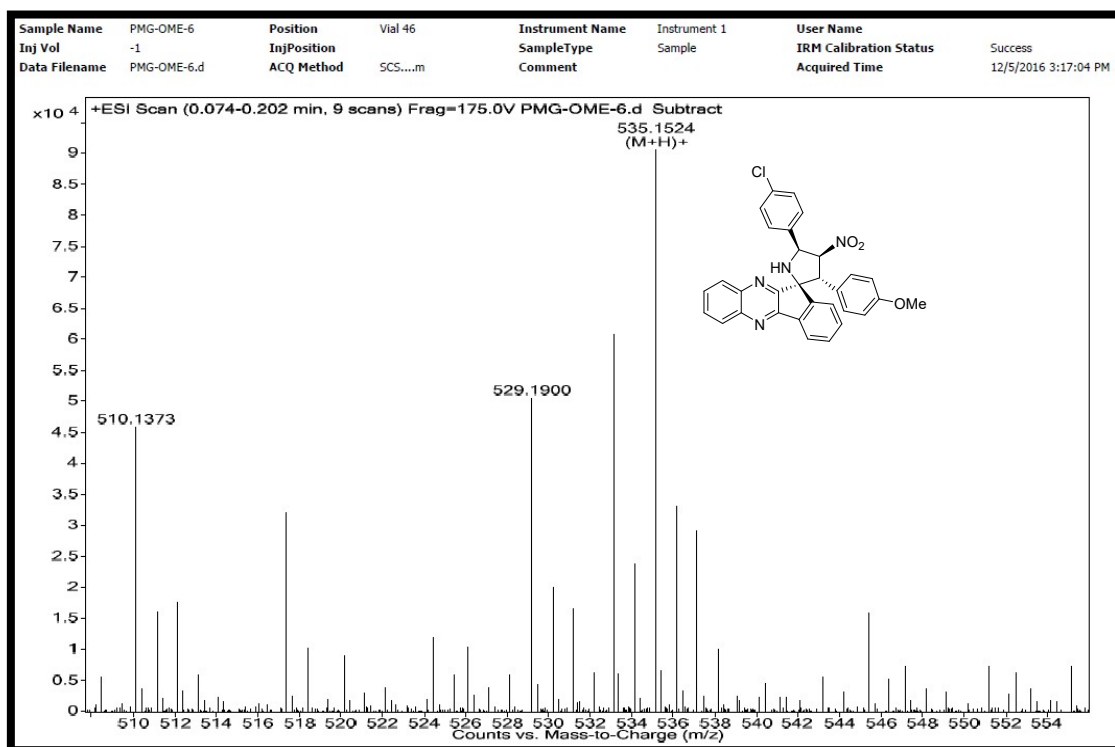

MS Formula Results: + Scan (0.074-0.202 min) SUD - PMG-OME-6.d (PMG-OME-6.d)

| m/z      | Ion    | Formula          | Abundance |
|----------|--------|------------------|-----------|
| 535.1524 | (M+H)+ | C31 H24 Cl N4 O3 | 90561.3   |

  

| Best                                | Formula (M)      | Ion Formula      | Calc. m/z | Score | Cross Score | Mass     | Calc. Mass | Diff (ppm) | Abs Diff (ppm) | Abund Match | Spacing Match | Mass Match | m/z      | DBE |
|-------------------------------------|------------------|------------------|-----------|-------|-------------|----------|------------|------------|----------------|-------------|---------------|------------|----------|-----|
| <input checked="" type="checkbox"/> | C31 H23 Cl N4 O3 | C31 H24 Cl N4 O3 | 535.1631  | 76.9  |             | 534.1453 | 534.1459   | 1.06       | 1.06           | 39.16       | 78.56         | 98.72      | 535.1524 | 22  |

IR

## Spectrum of compound 5h

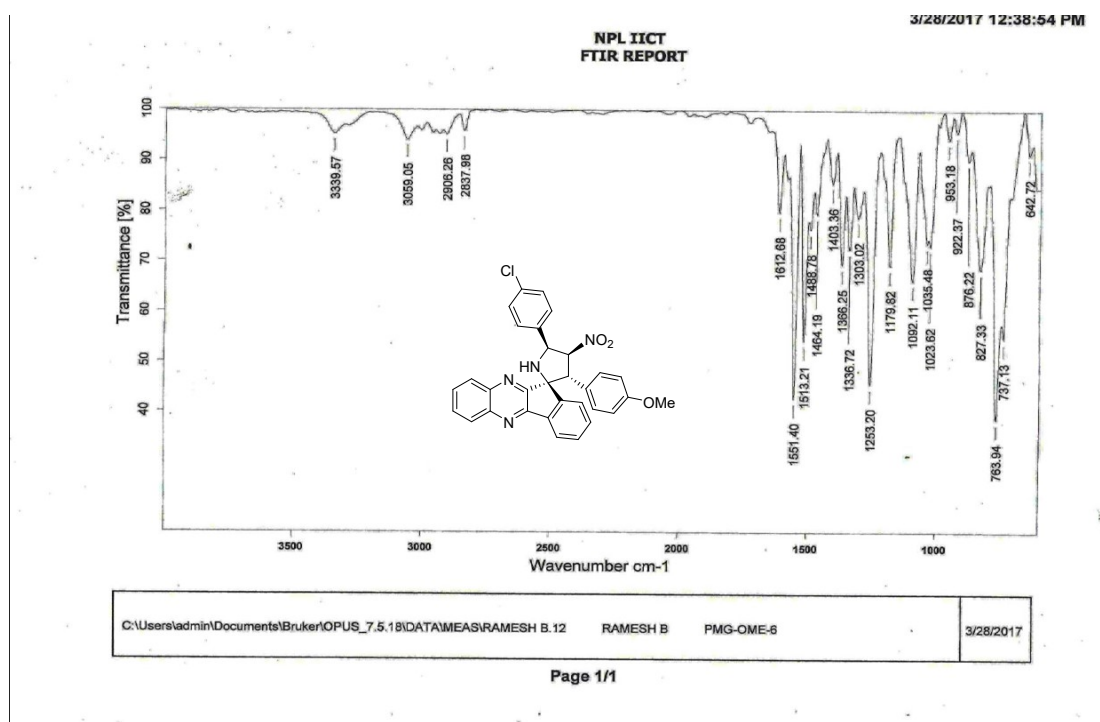

S19

### <sup>1</sup>H NMR Spectrum (CDCl<sub>3</sub>, 400 MHz) of compound 5h

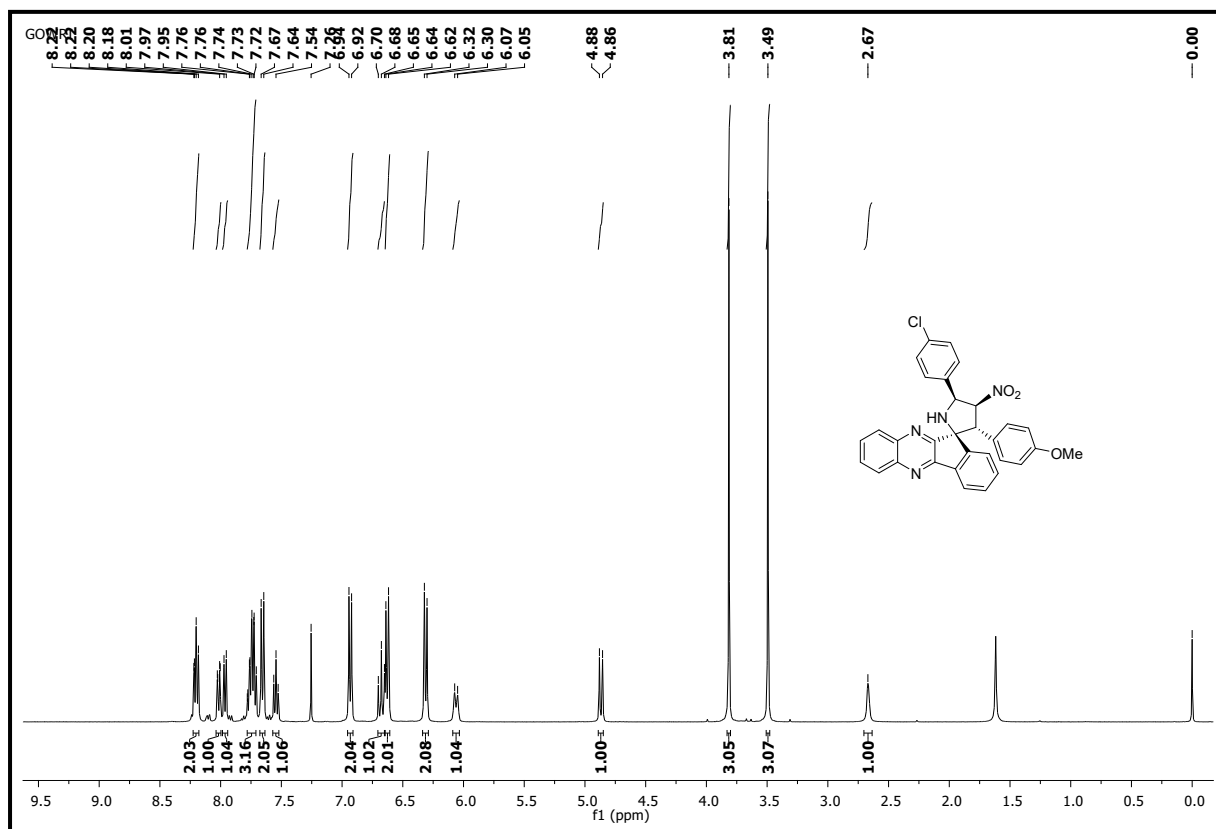

### <sup>13</sup>C NMR Spectrum (CDCl<sub>3</sub>, 100 MHz) of compound 5h

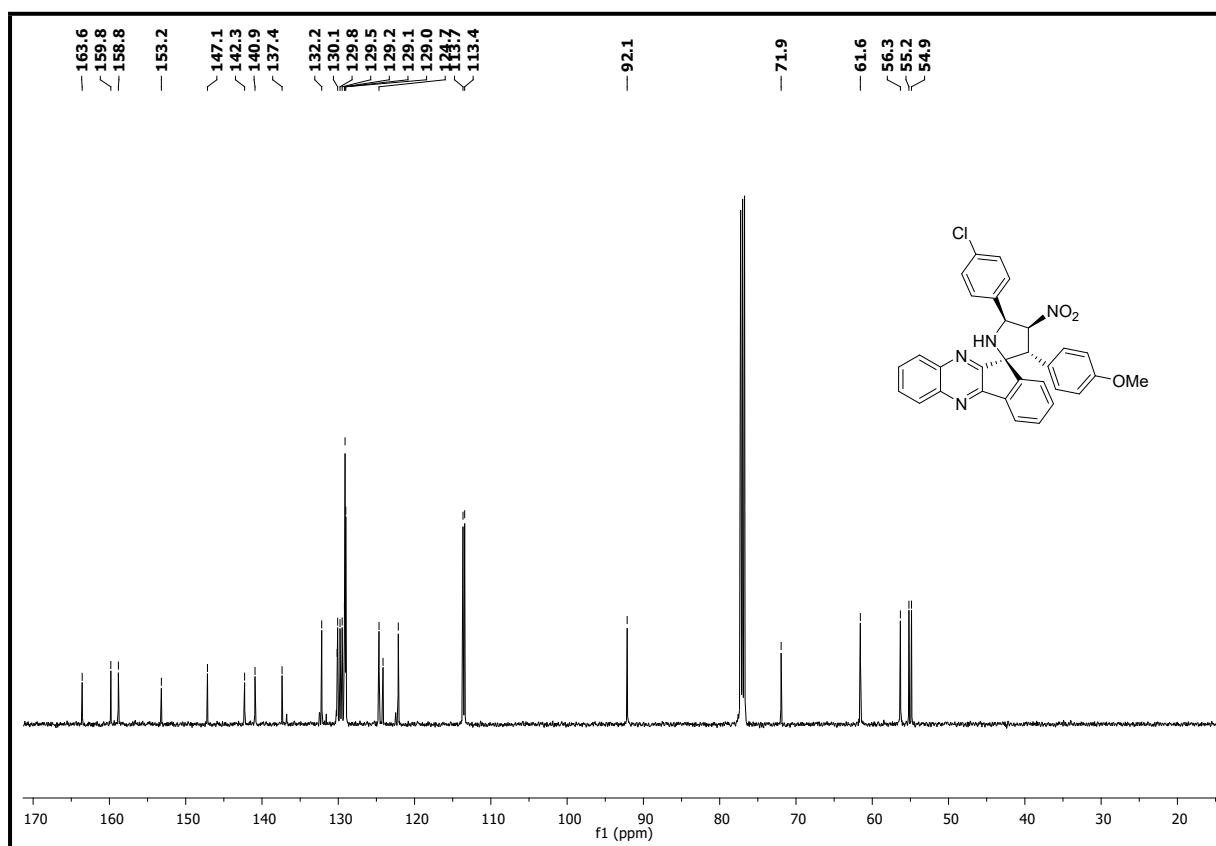

## HR-ESIM Spectrum of compound 5i

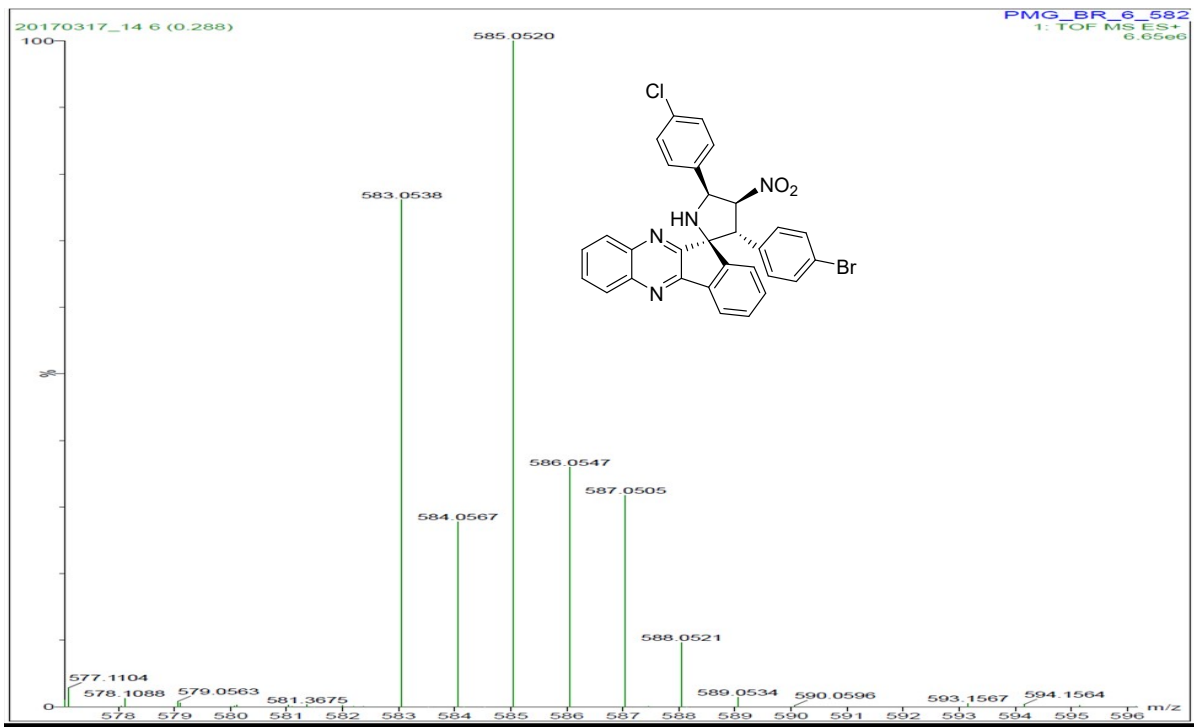

## IR Spectrum of compound 5i

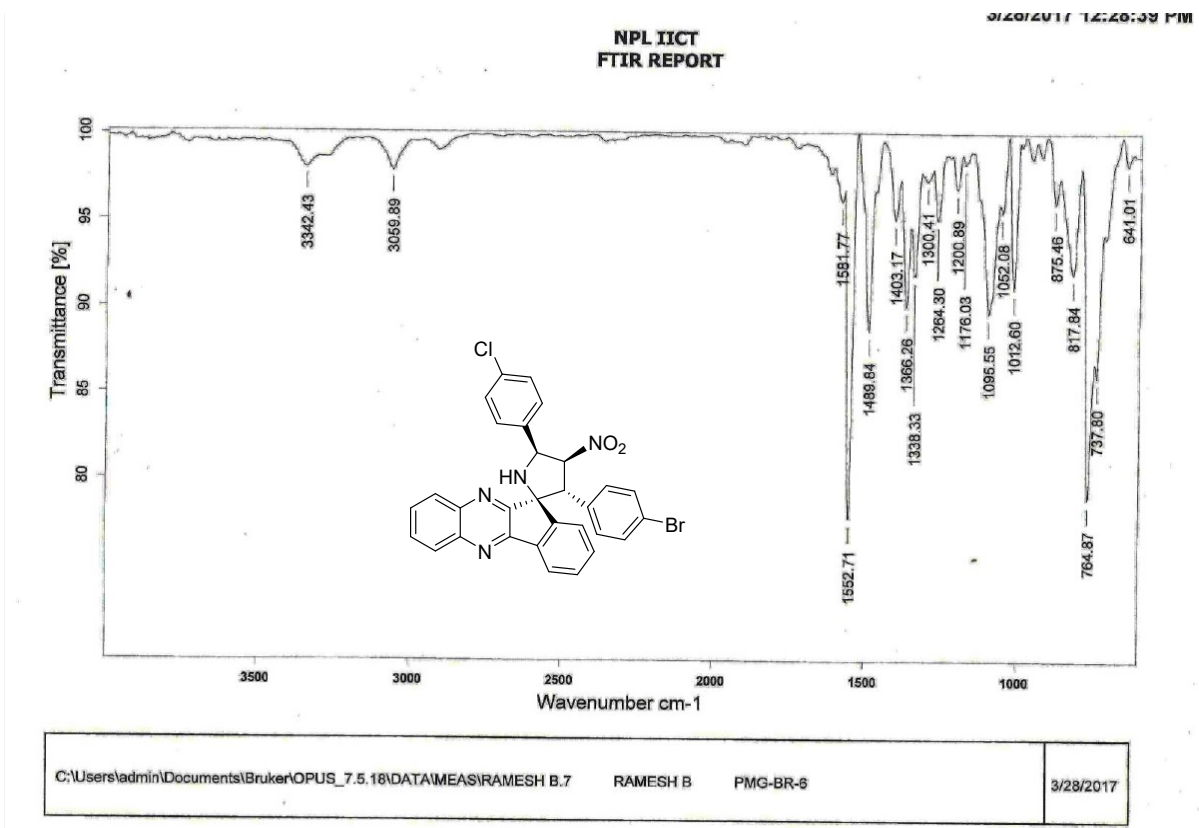

**<sup>1</sup>H NMR Spectrum (CDCl<sub>3</sub>, 400 MHz) of compound 5i**

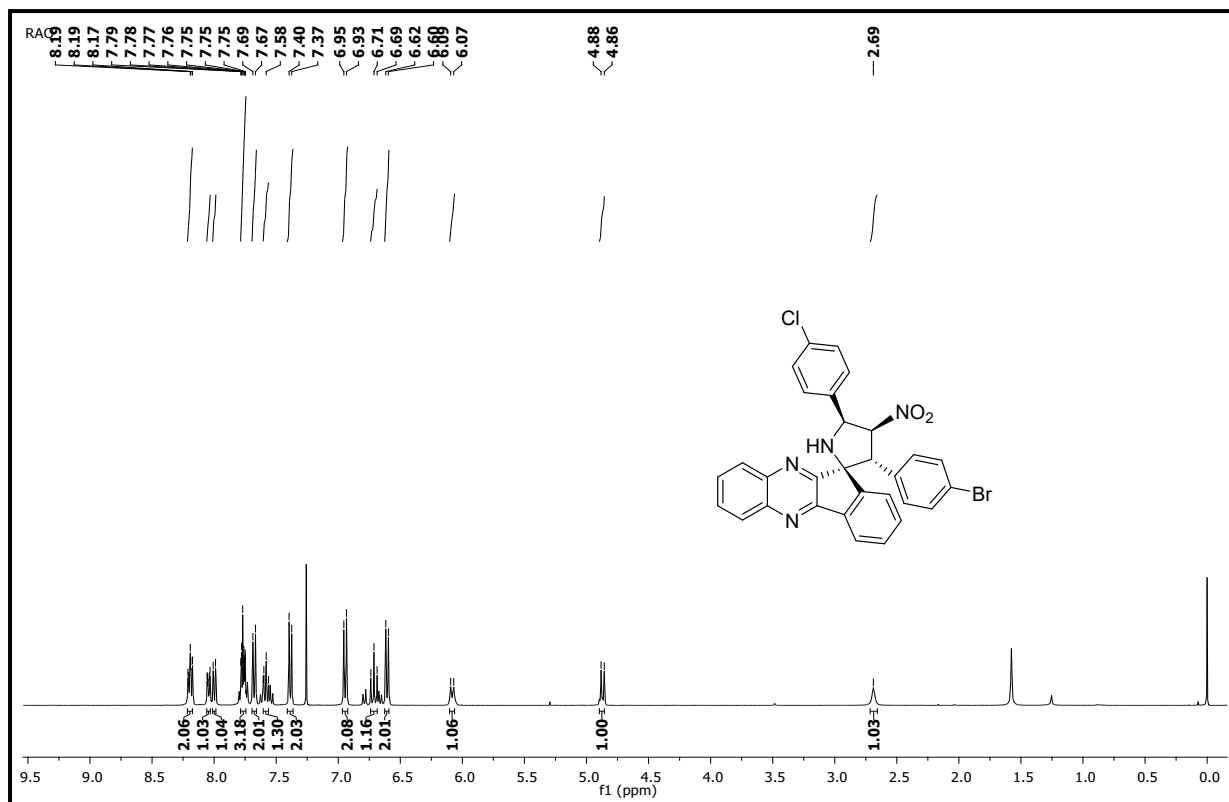

**<sup>13</sup>C NMR Spectrum (CDCl<sub>3</sub>, 100 MHz) of compound 5i**

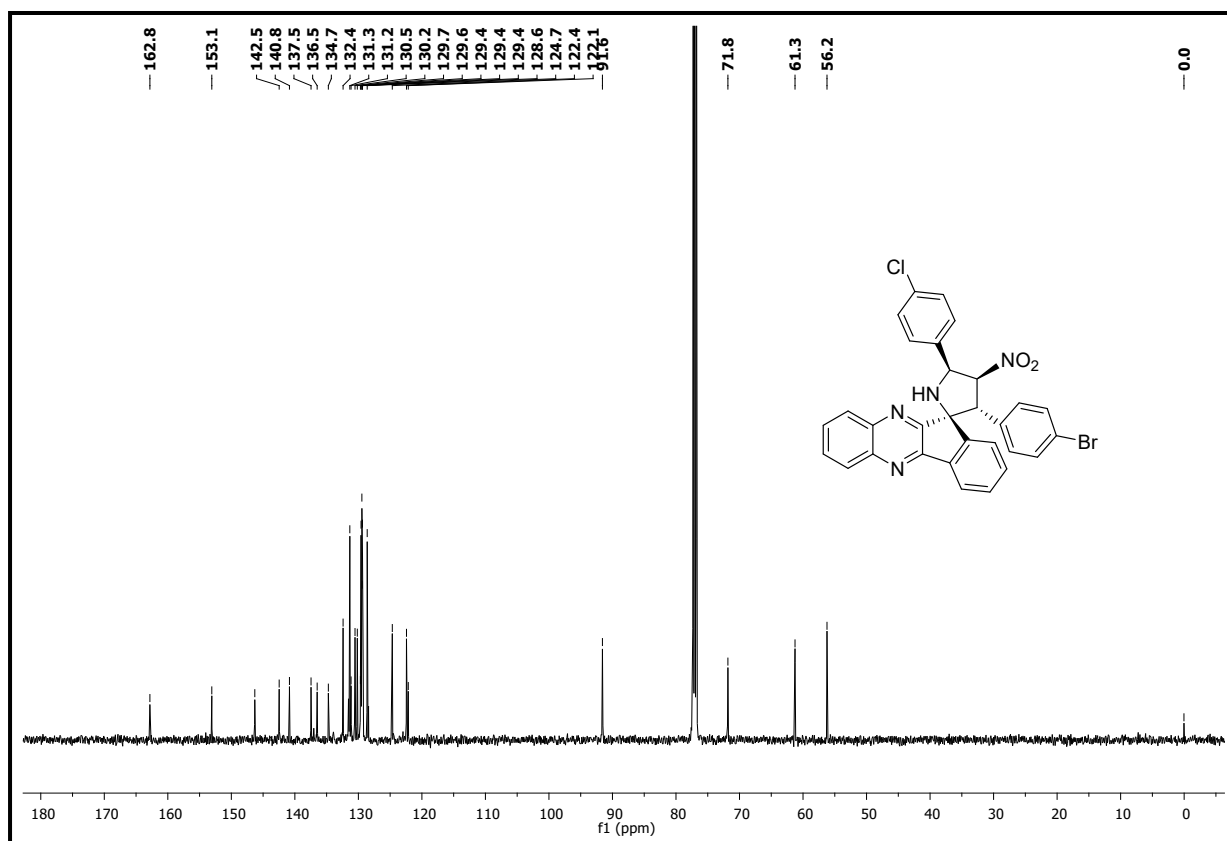

HSQC NMR Spectrum (CDCl<sub>3</sub>, 400 MHz) of compound 5i

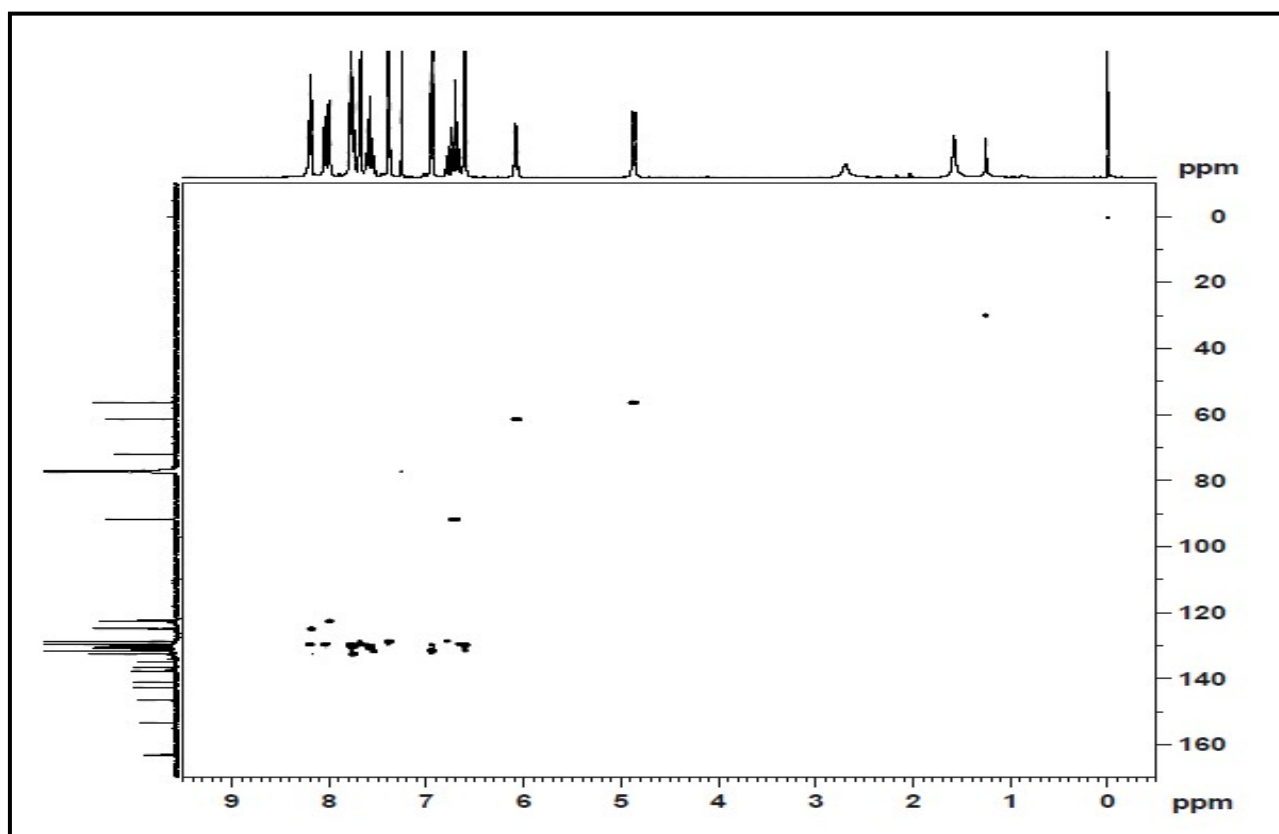

HSQC NMR Spectrum(expansion) (CDCl<sub>3</sub>, 400 MHz) of compound 5i

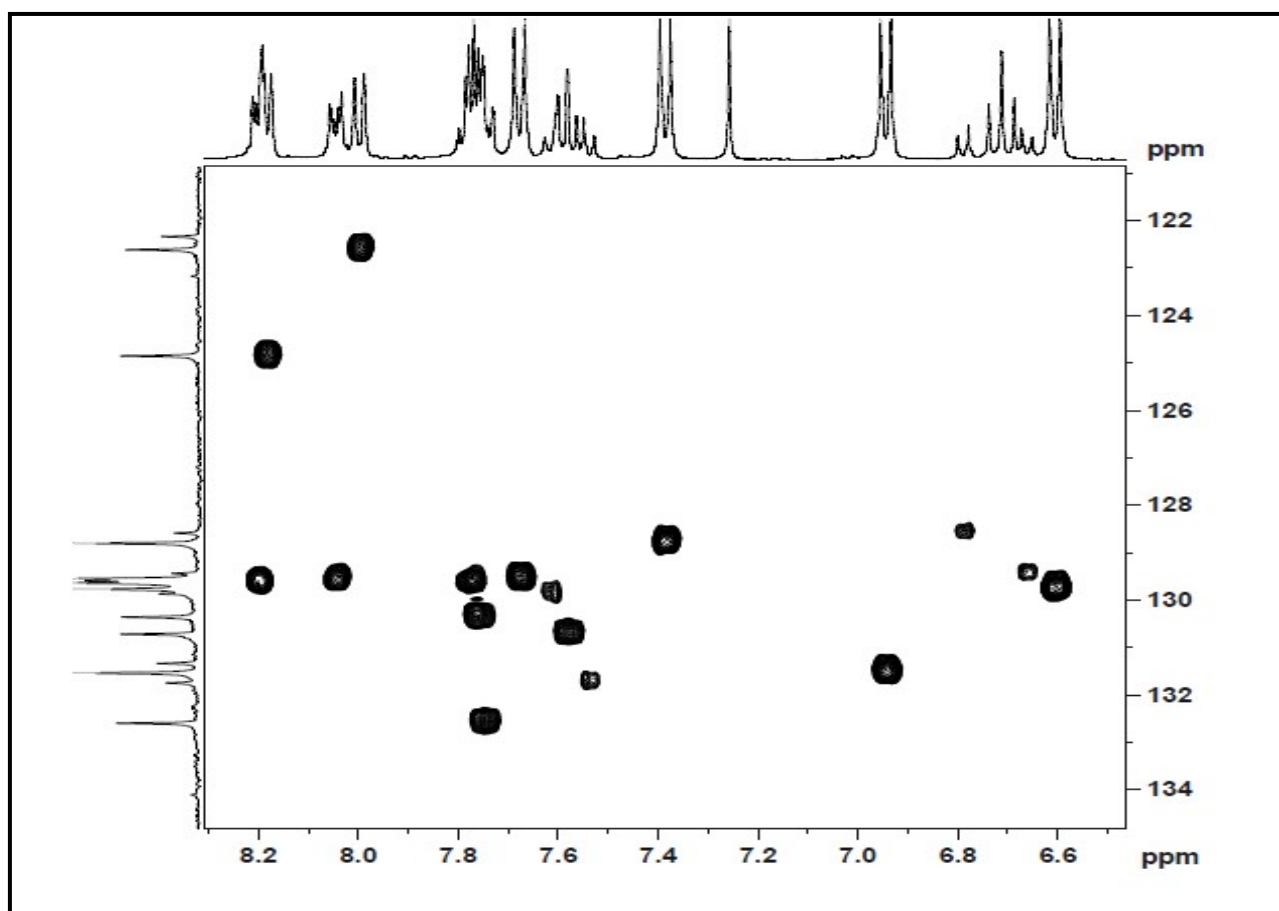

HMBC NMR Spectrum (CDCl<sub>3</sub>, 400 MHz) of compound 5i

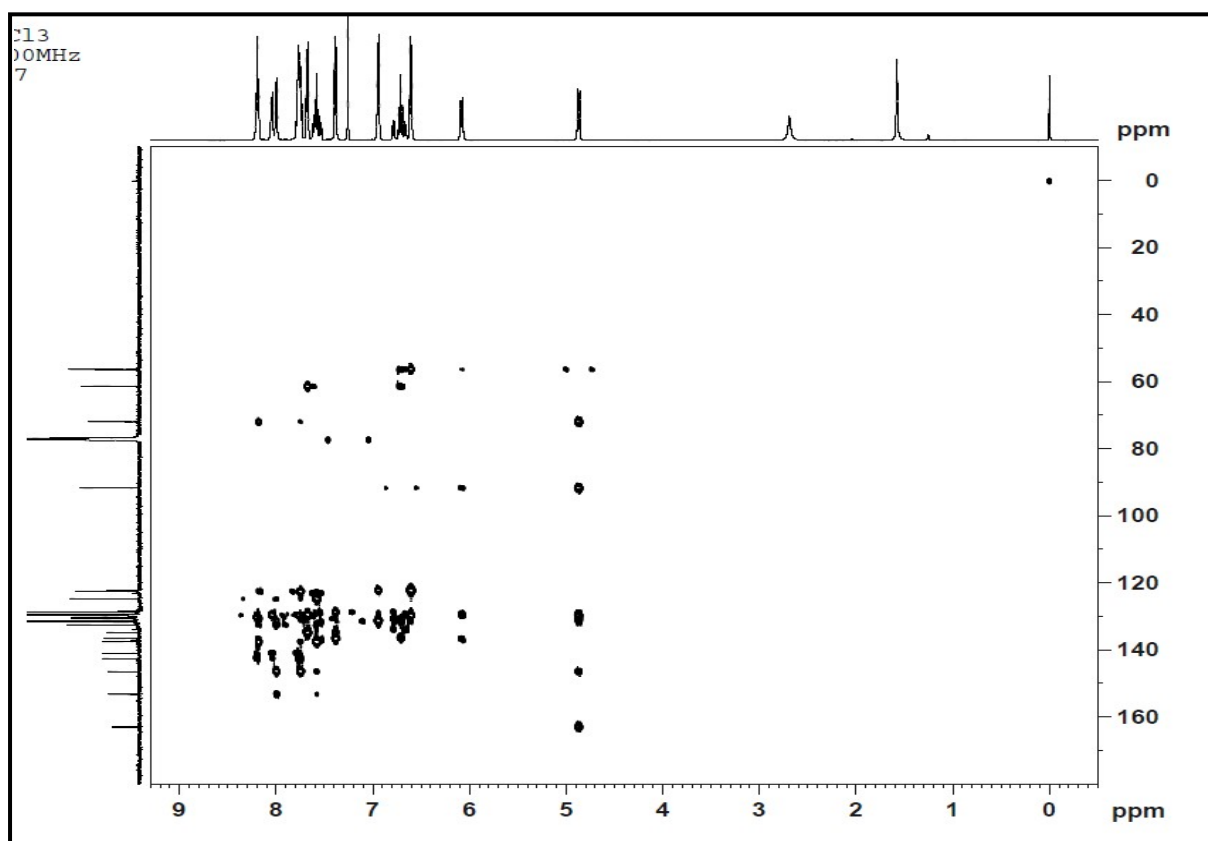

HMBC NMR Spectrum(expansion) (CDCl<sub>3</sub>, 400 MHz) of compound 5i

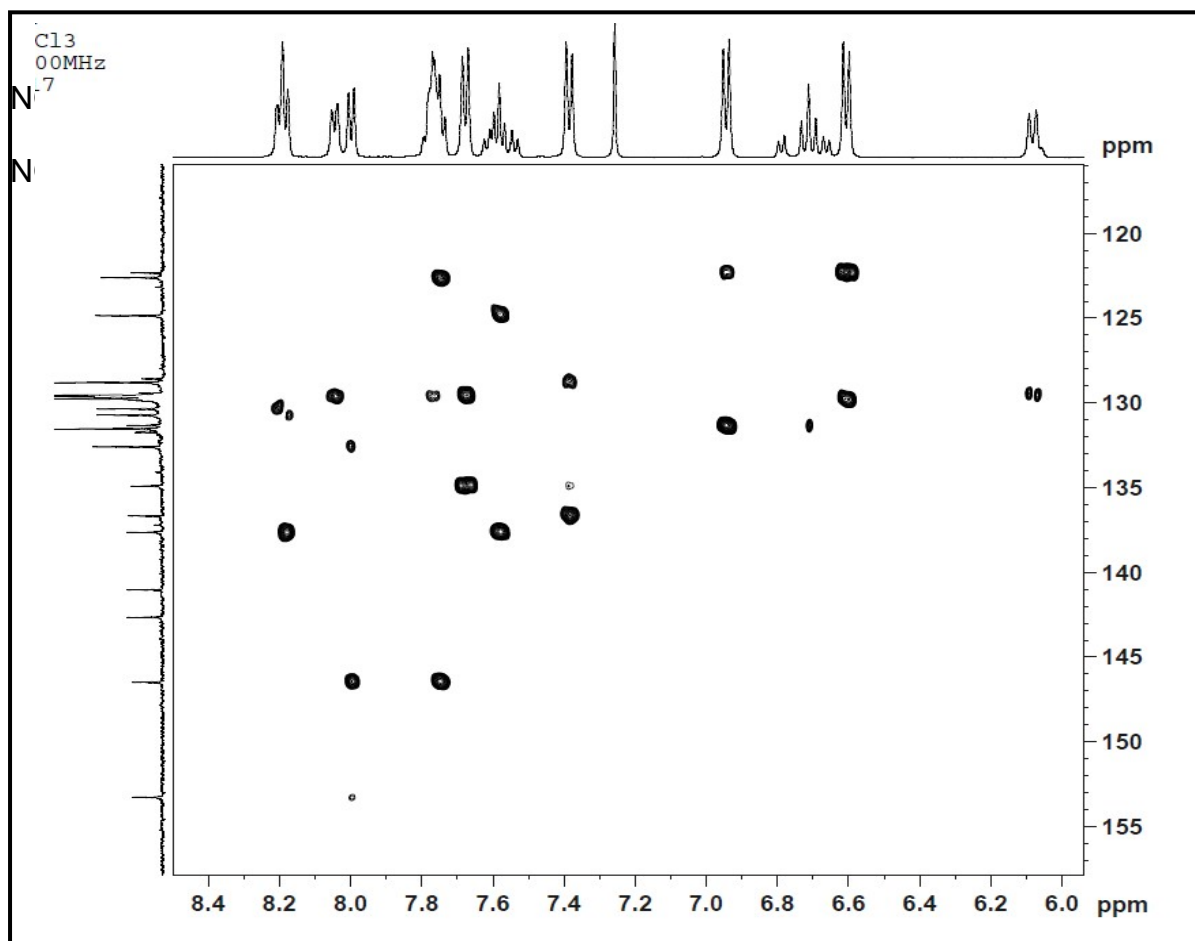



NOESY Spectrum (CDCl<sub>3</sub>, 400 MHz) of compound 5i

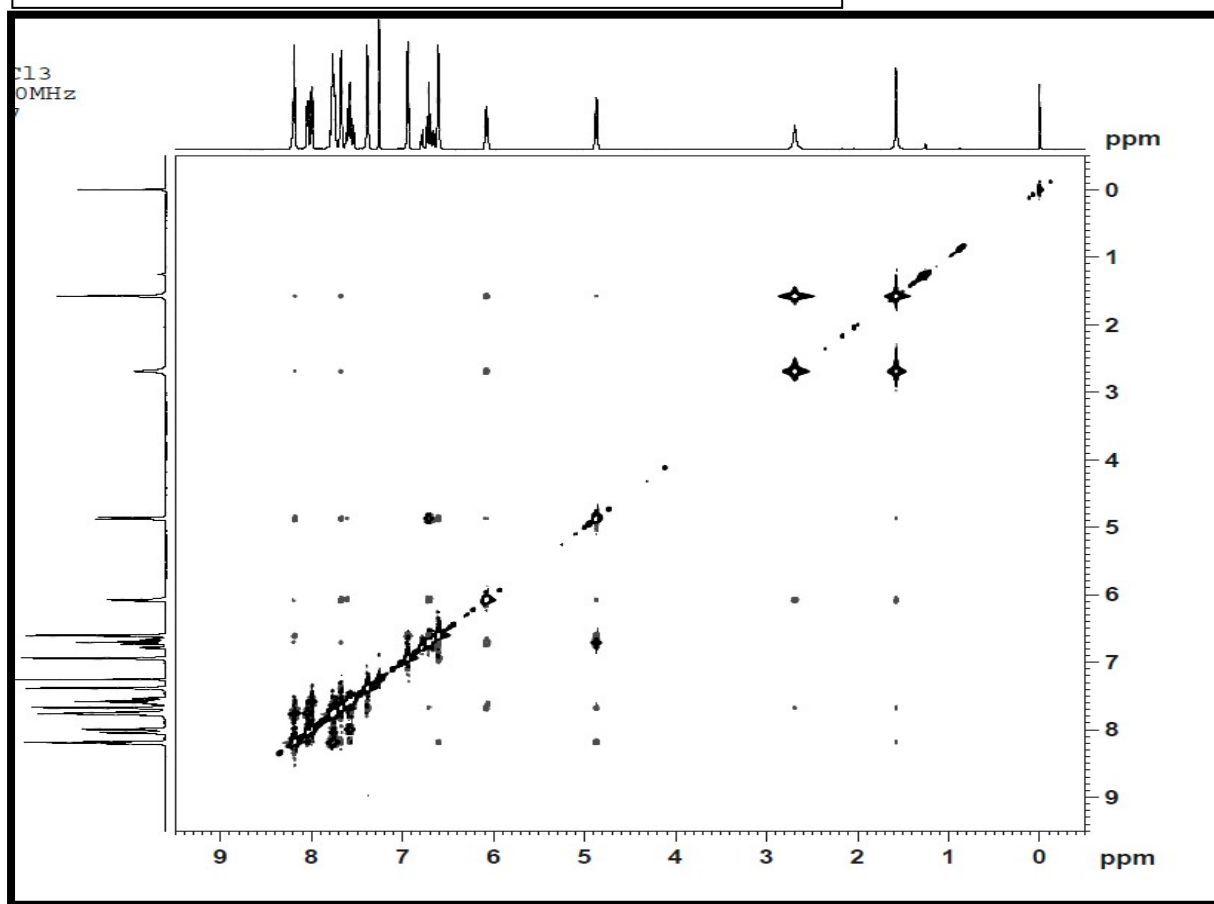

NOESY Spectrum (CDCl<sub>3</sub>, 400 MHz) of compound 5i

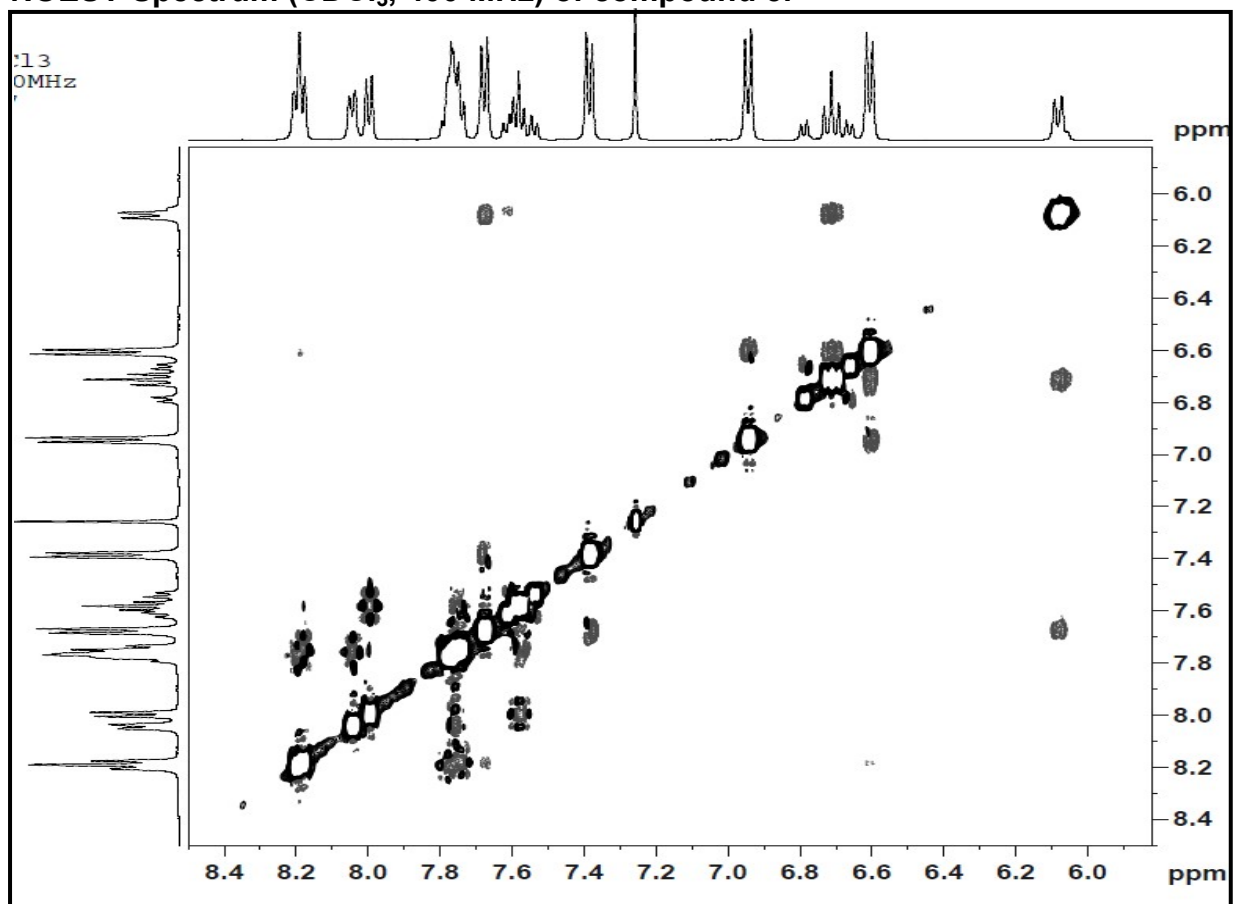

COSY Spectrum (CDCl<sub>3</sub>, 400 MHz) of compound 5i

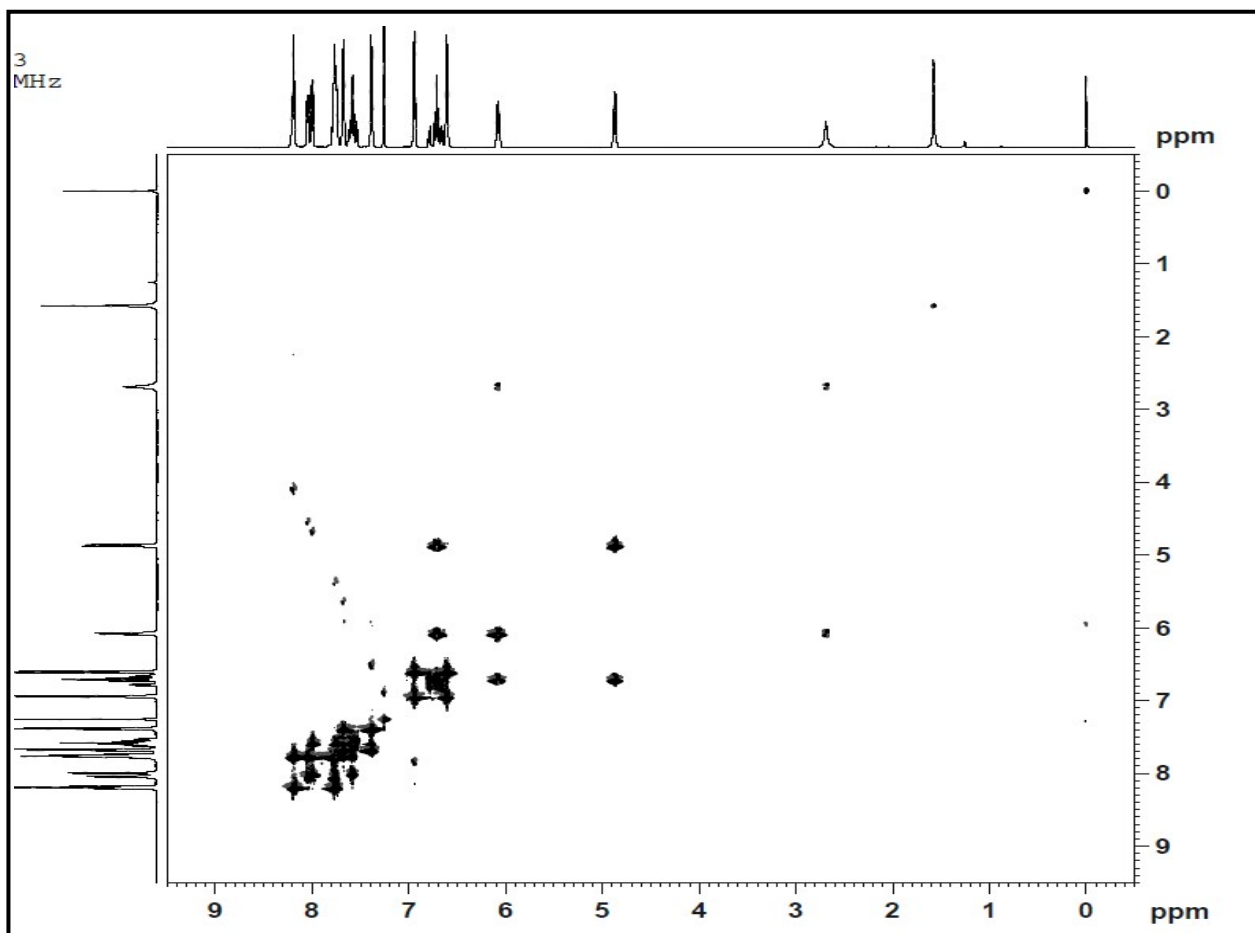

COSY Spectrum(expansion) (CDCl<sub>3</sub>, 400 MHz) of compound 5i

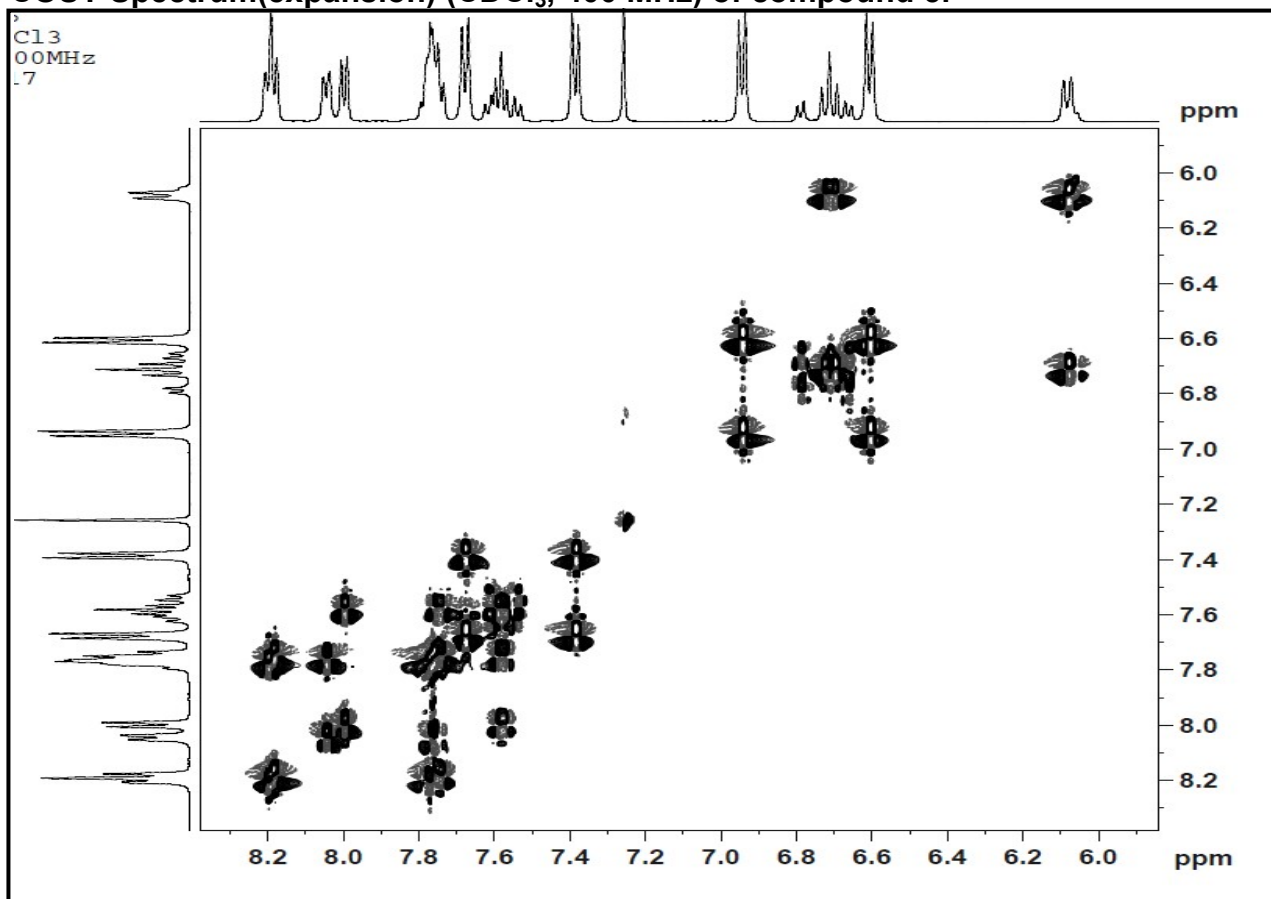

## HR-ESIM Spectrum of compound 5j

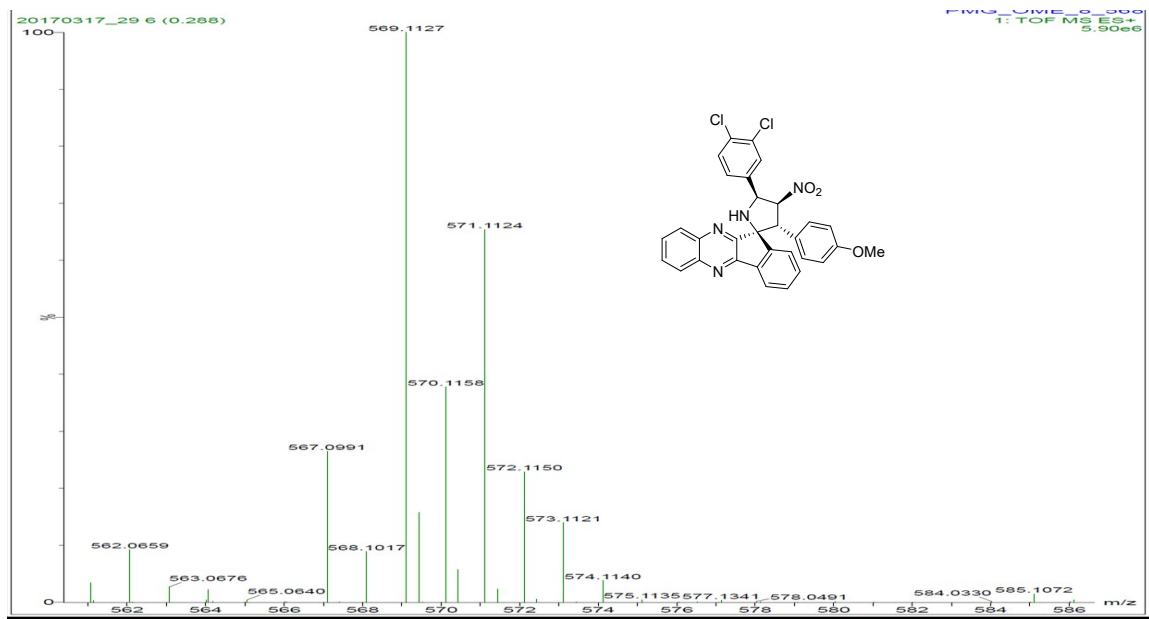

91 formula(e) evaluated with 1 results within limits (up to 50 closest results for each mass)  
 Elements Used:  
 C: 0-31 H: 0-23 N: 0-4 O: 0-3 Na: 0-1 Cl: 0-2  
 20170317\_29.6 (0.288) PMG\_OME\_8\_568  
1: TOF MS ES+  
5.90e+006

| Mass     | Calc. Mass | mDa  | PPM  | DBE  | i-FIT | Norm | Conf (%) | Formula           |
|----------|------------|------|------|------|-------|------|----------|-------------------|
| 569.1127 | 569.1147   | -2.0 | -3.5 | 21.5 | 131.6 | n/a  | n/a      | C31 H23 N4 O3 Cl2 |

## IR Spectrum of compound 5j

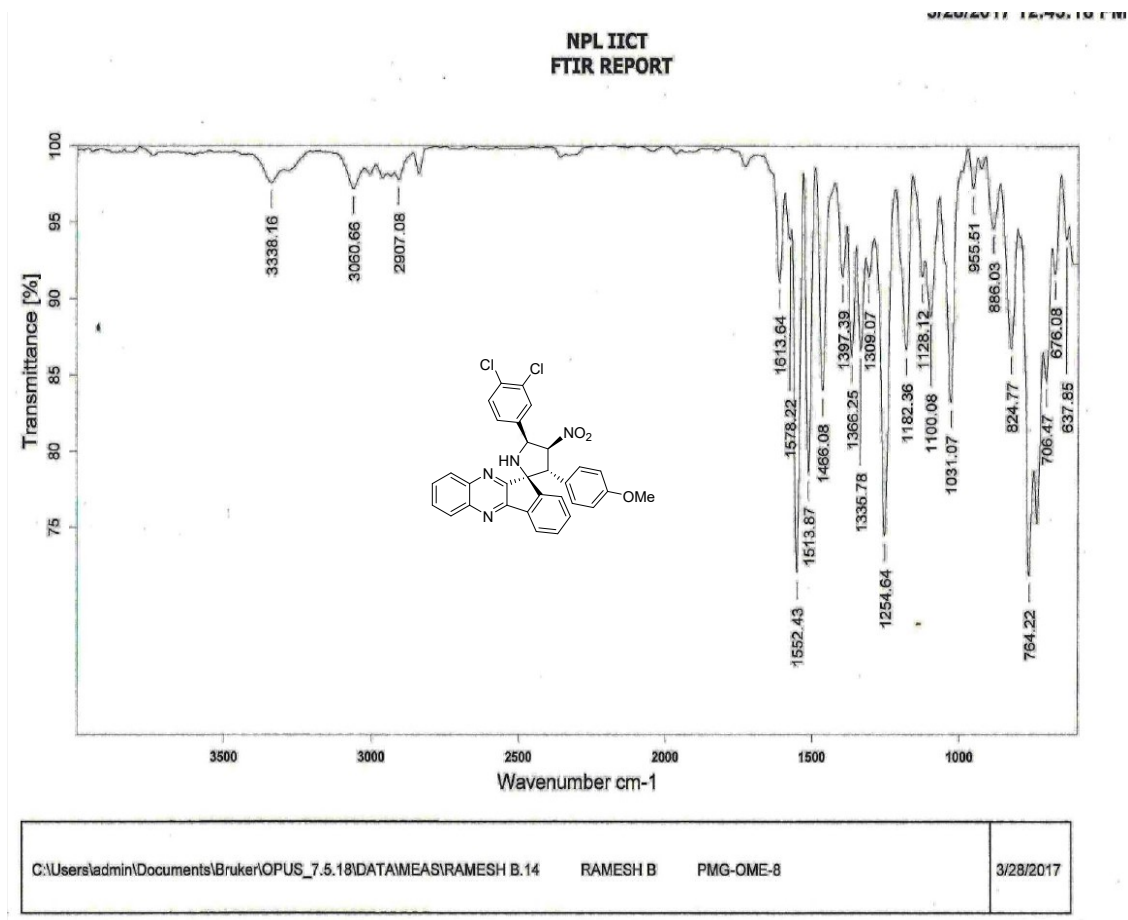

### <sup>1</sup>H NMR Spectrum (CDCl<sub>3</sub>, 400 MHz) of compound 5j

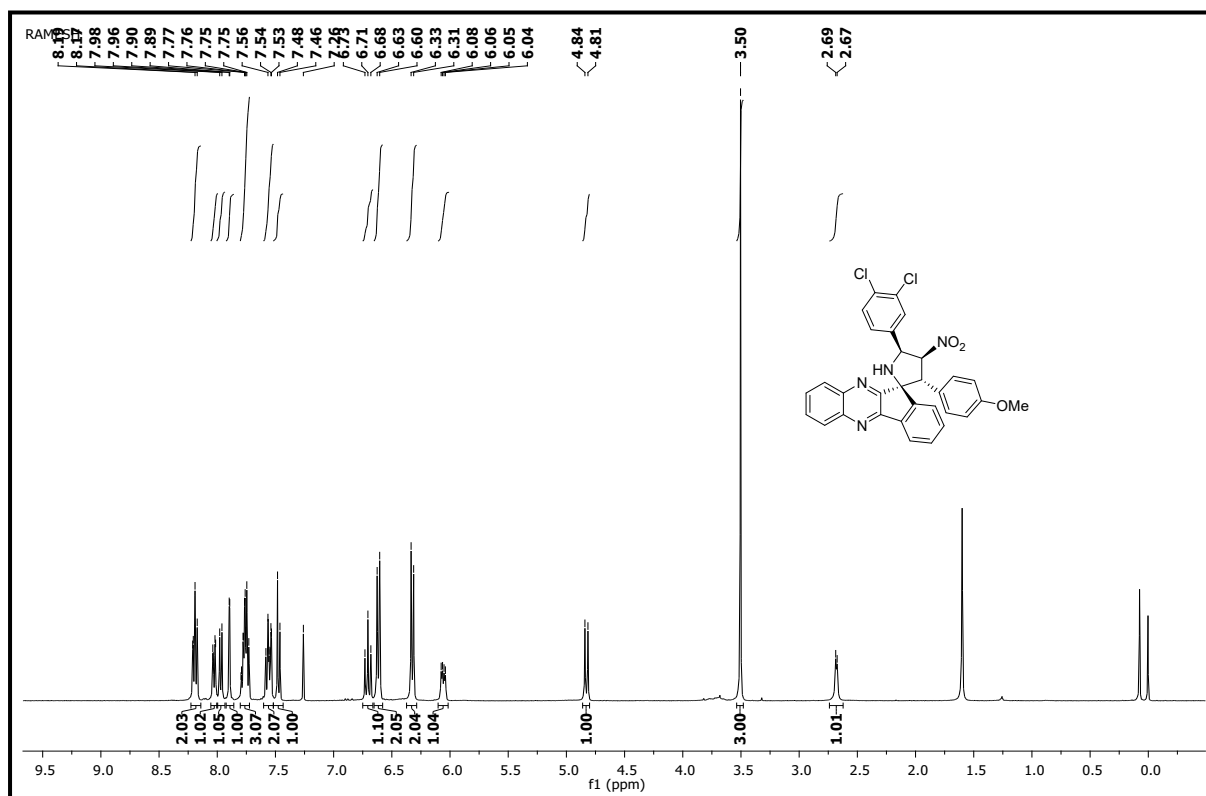

### <sup>13</sup>C NMR Spectrum (CDCl<sub>3</sub>, 100 MHz) of compound 5j

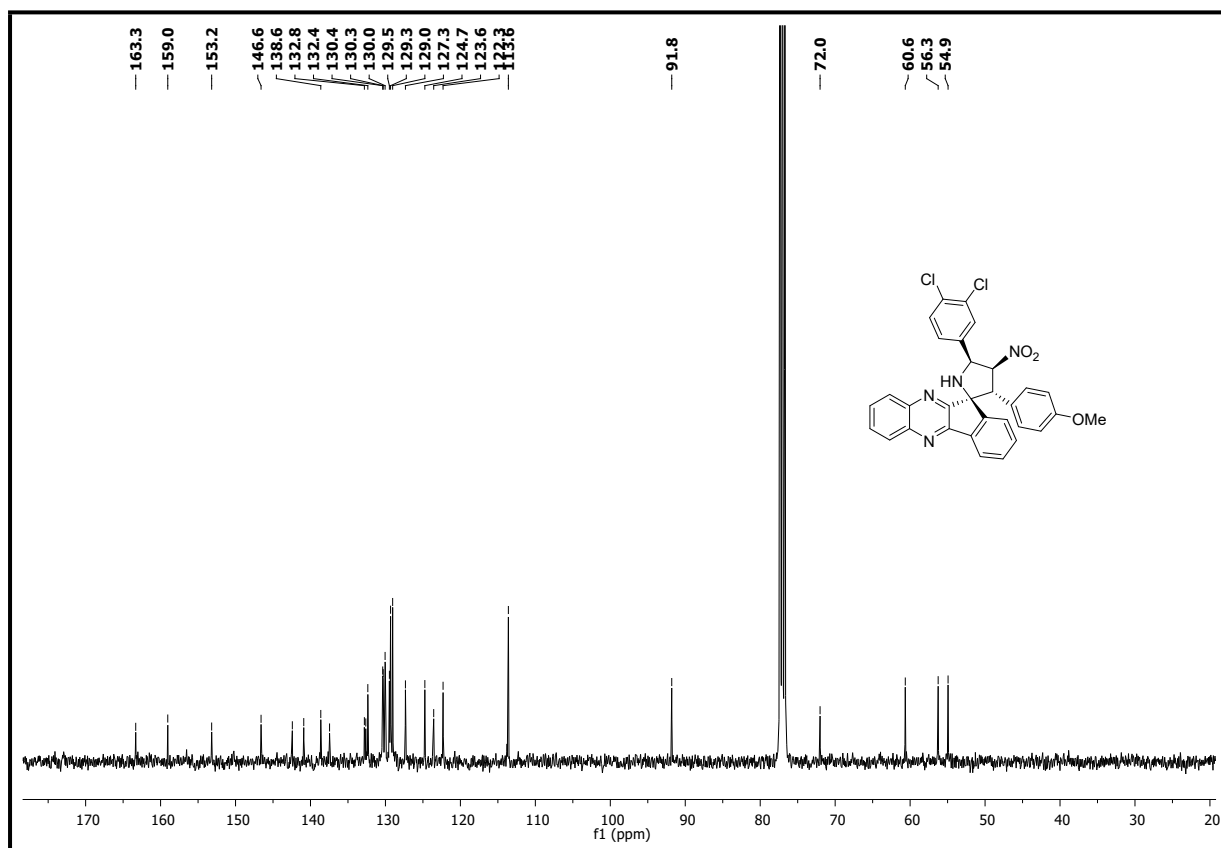

# HR-ESIM Spectrum of compound 5k

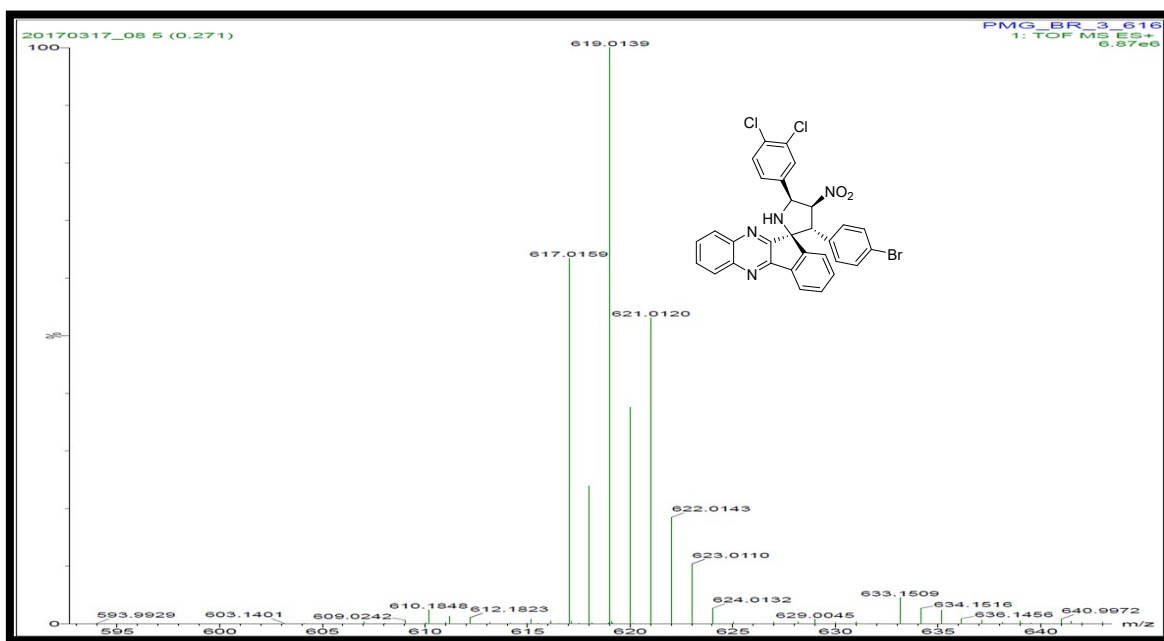

120 formula(e) evaluated with 1 results within limits (up to 50 closest results for each mass)

Elements Used:

C: 0-30 H: 0-20 N: 0-5 O: 0-3 Cl: 0-2 Br: 0-1

20170317\_08 5 (0.271)

PMG\_BR\_3\_616

1: TOF MS ES+

6.87e+006

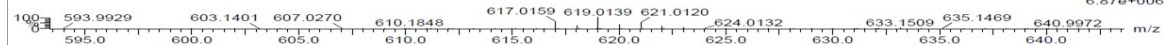

Minimum:

Maximum: 5.0 10.0 -1.5

50.0

Mass Calc. Mass mDa PPM DBE i-FIT Norm Conf(%) Formula

617.0159 617.0147 1.2 1.9 21.5 143.5 n/a n/a C30 H20 N4 O2 Cl2 Br

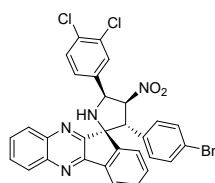

## R Spectrum of compound 5k

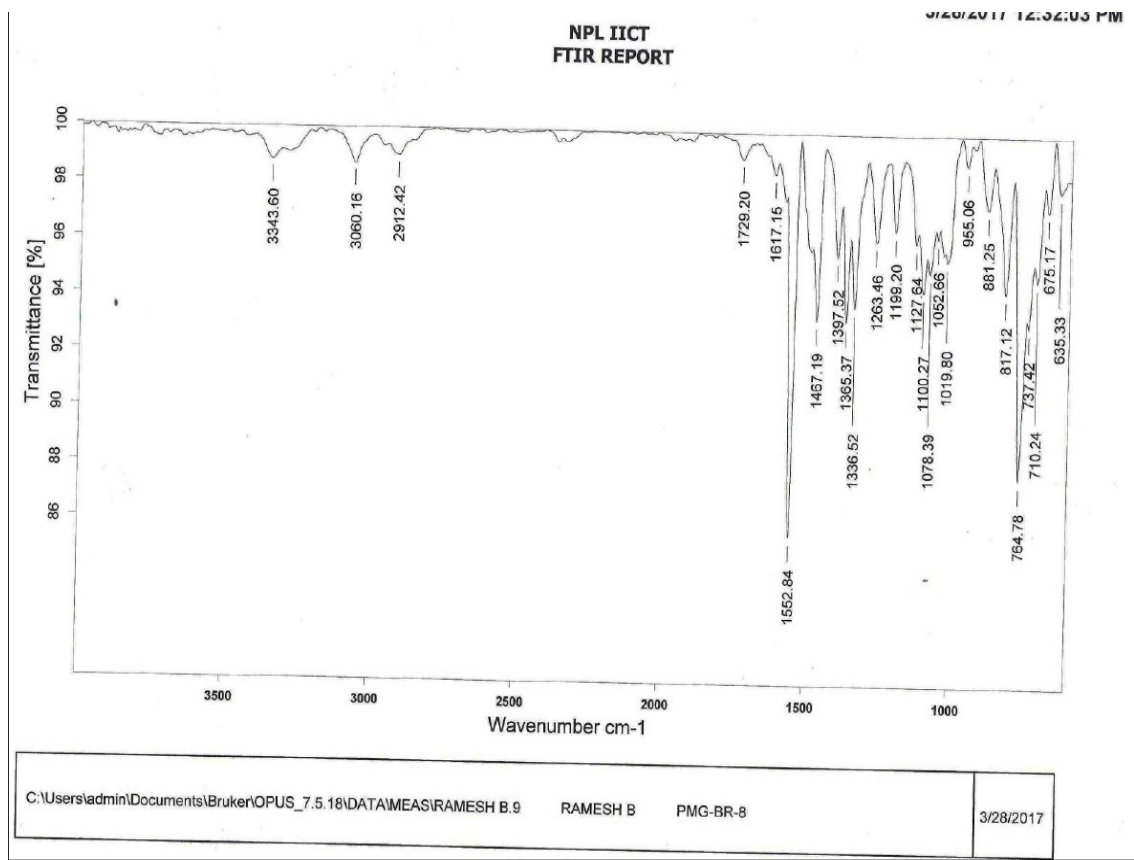

## <sup>1</sup>H NMR Spectrum (CDCl<sub>3</sub>, 500 MHz) of compound 5k

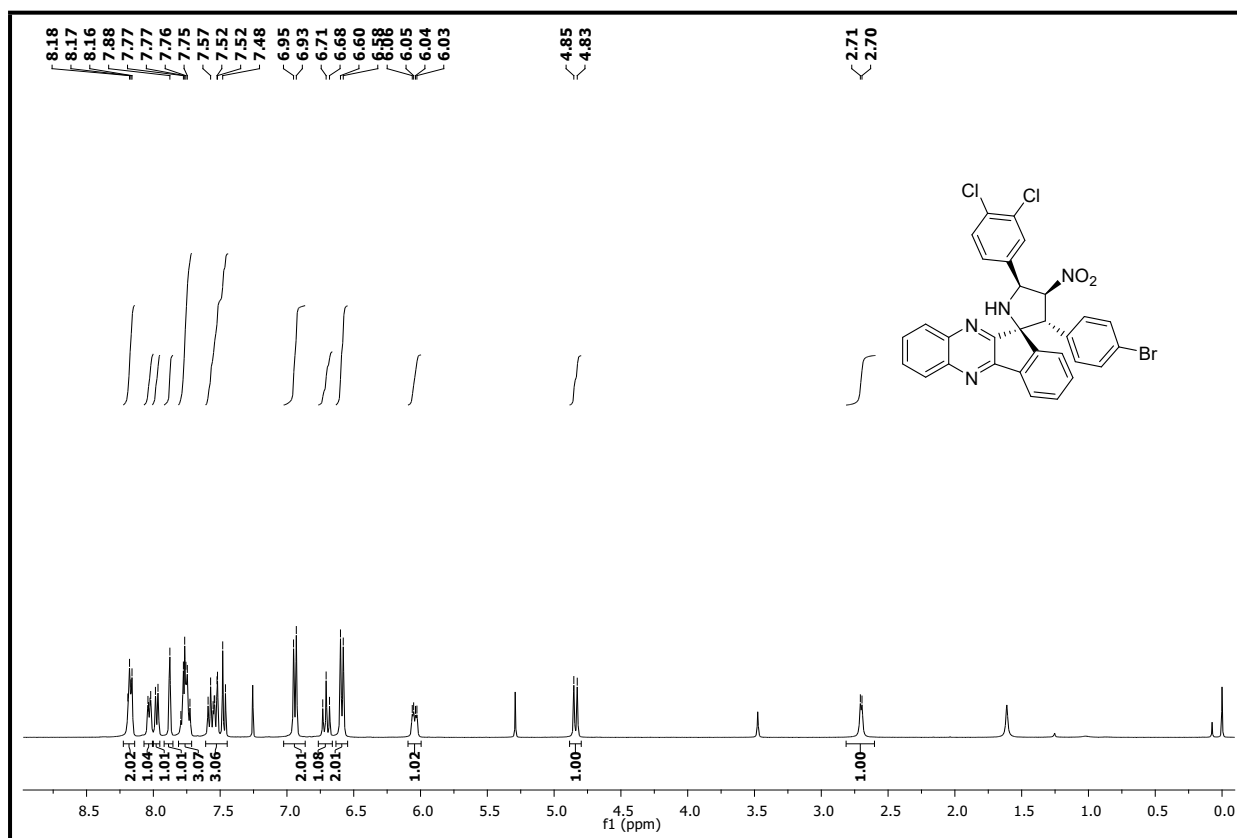

**<sup>13</sup>C NMR Spectrum (CDCl<sub>3</sub>, 125 MHz) of compound 5k**

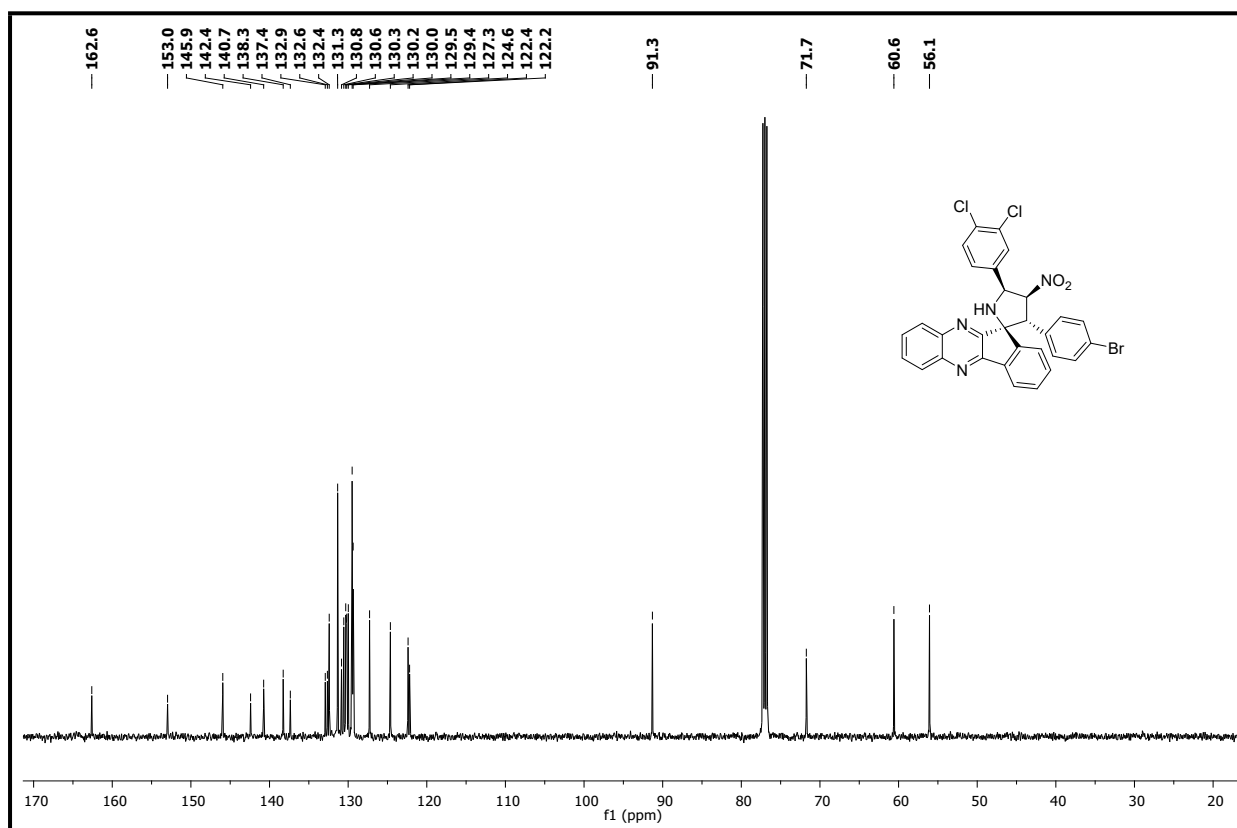

**HR-ESIM Spectrum of compound 5l**

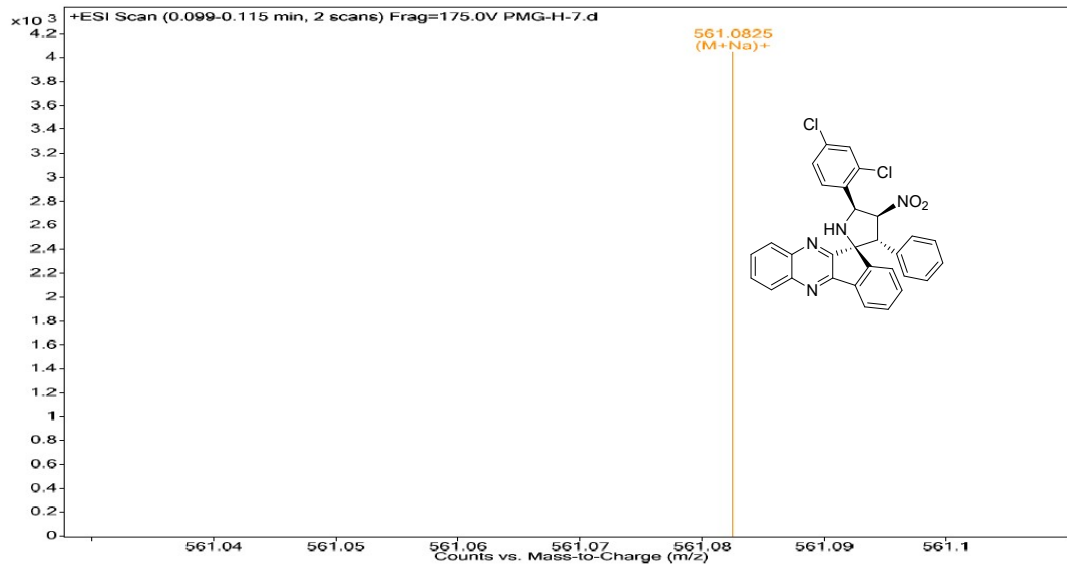

MS Formula Results: + Scan (0.099-0.115 min) - PMG-H-7.d (PMG-H-7.d)

| m/z      | Ion                 | Formula                                                                       | Abundance |
|----------|---------------------|-------------------------------------------------------------------------------|-----------|
| 561.0825 | (M+Na) <sup>+</sup> | C <sub>30</sub> H <sub>20</sub> Cl <sub>2</sub> N <sub>4</sub> O <sub>2</sub> | 4645.4    |

  

| Best                                | Formula (M)                                                                   | Ion Formula                                                                   | Calc. m/z | Score | Cross Score | Mass     | Calc. Mass | Diff (ppm) | Abs. Diff (ppm) | Abund. Match | Spacing Match | Mass Match | m/z      | DBE |
|-------------------------------------|-------------------------------------------------------------------------------|-------------------------------------------------------------------------------|-----------|-------|-------------|----------|------------|------------|-----------------|--------------|---------------|------------|----------|-----|
| <input checked="" type="checkbox"/> | C <sub>30</sub> H <sub>20</sub> Cl <sub>2</sub> N <sub>4</sub> O <sub>2</sub> | C <sub>30</sub> H <sub>20</sub> Cl <sub>2</sub> N <sub>4</sub> O <sub>2</sub> | 561.0856  | 43.95 |             | 538.0925 | 538.0963   | 7.07       | 7.07            | 9.55         | 57.51         | 57.82      | 561.0825 | 22  |

### IR Spectrum of compound 5I

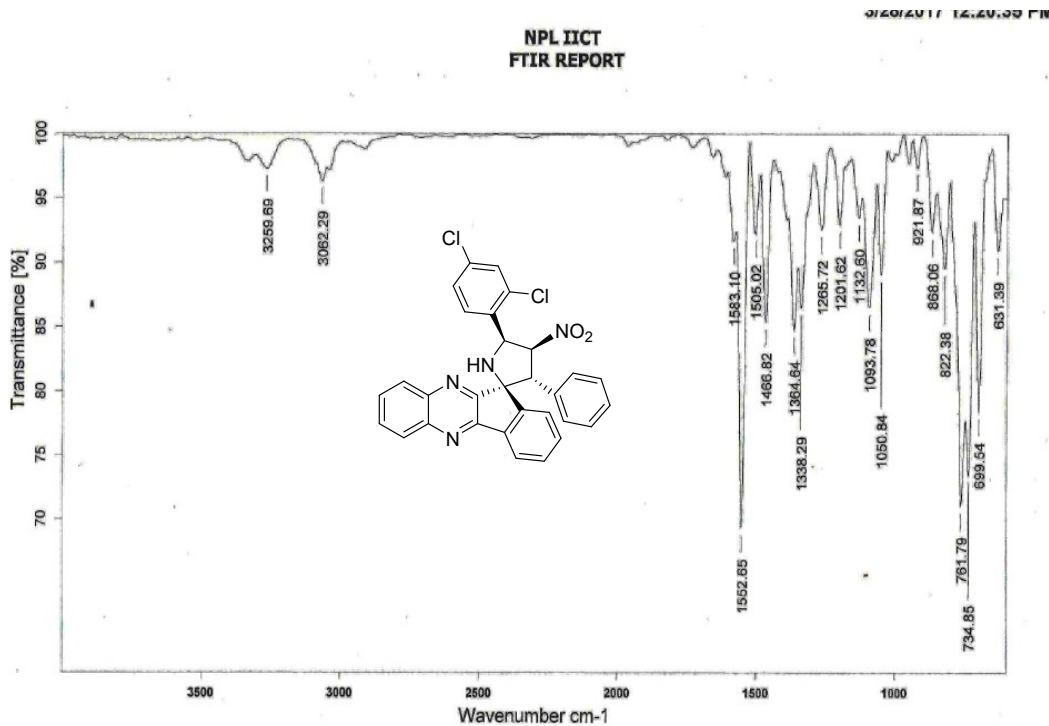

C:\Users\admin\Documents\Bruker\OPUS\_7.5.18\DATA\MEAS\RAMESH B.3 RAMESH B PMG-H-7 3/28/2017

### <sup>1</sup>H NMR Spectrum (CDCl<sub>3</sub>, 500 MHz) of compound 5I



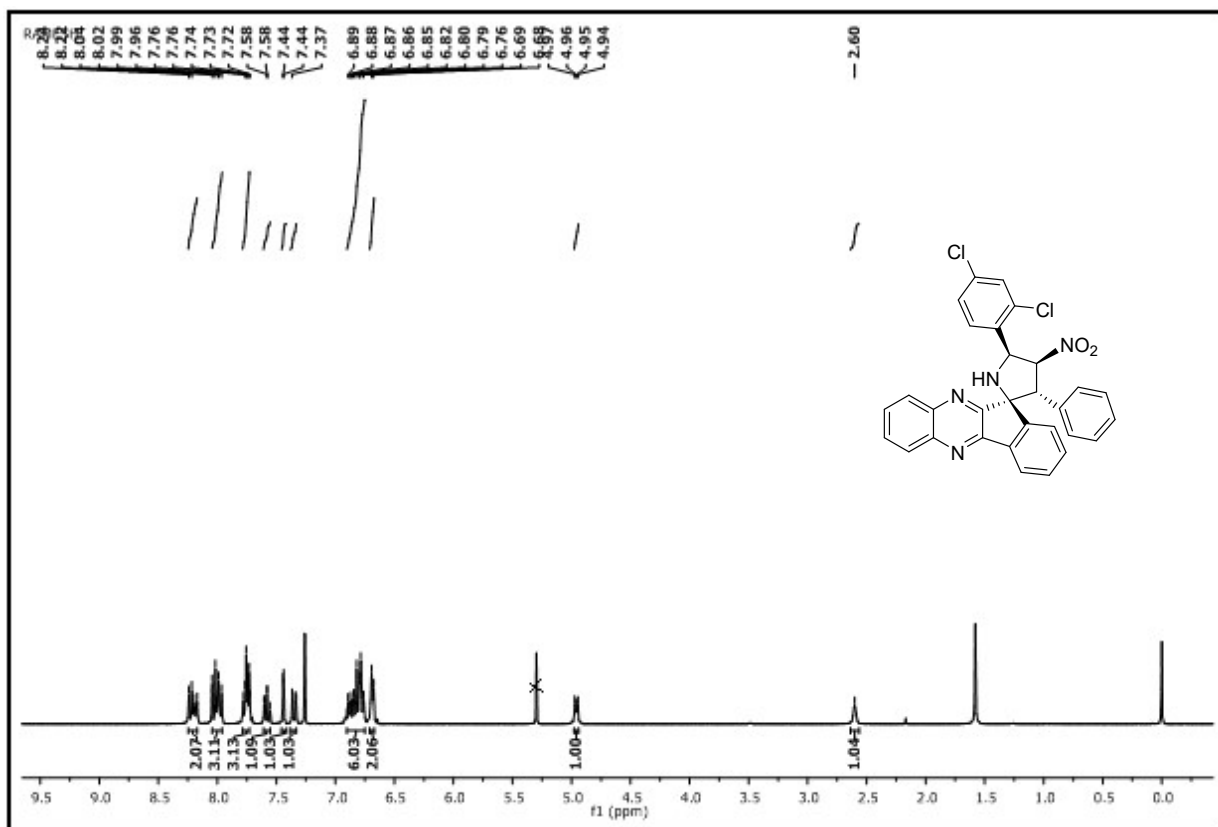

<sup>13</sup>C NMR Spectrum (CDCl<sub>3</sub>, 100 MHz) of compound 5l

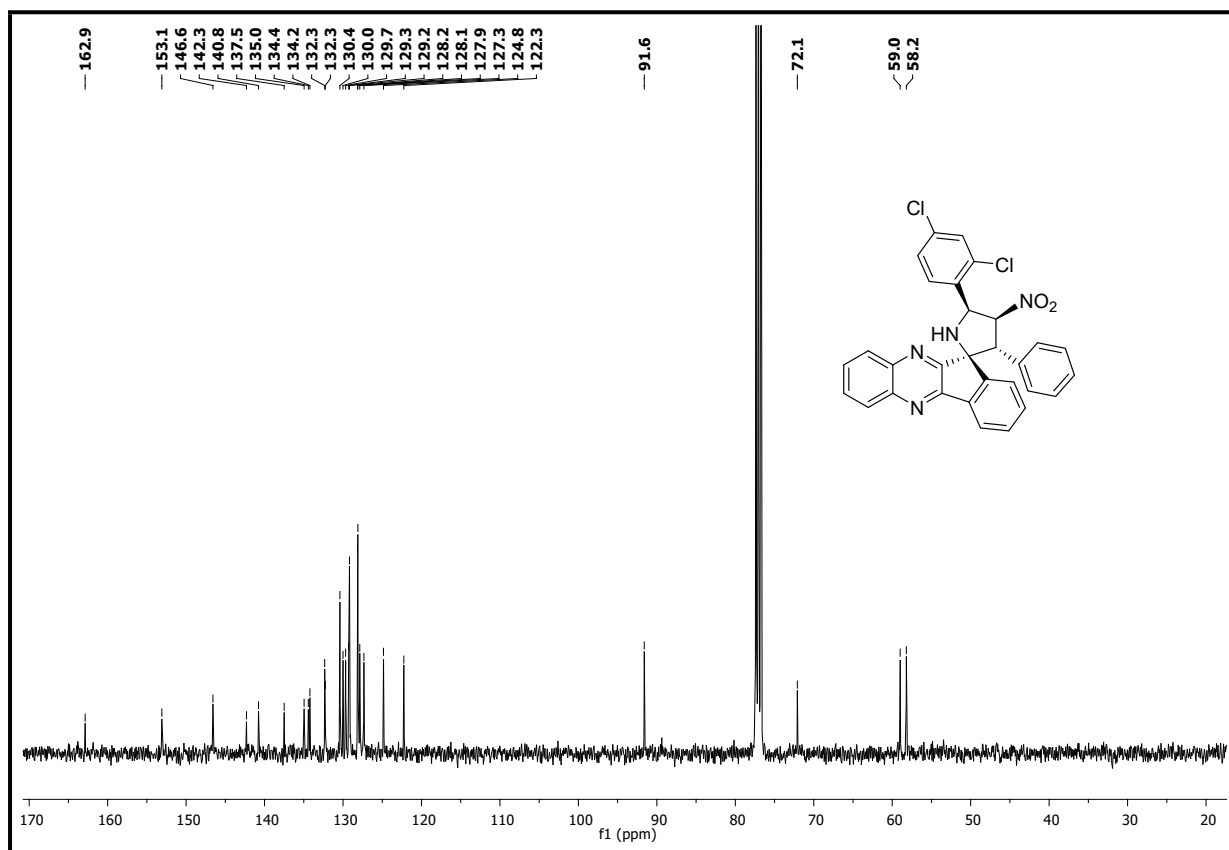

HR-ESIM Spectrum of compound 5m

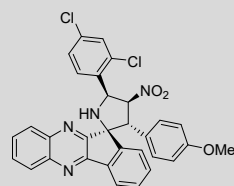

IR Spectrum of compound 5m

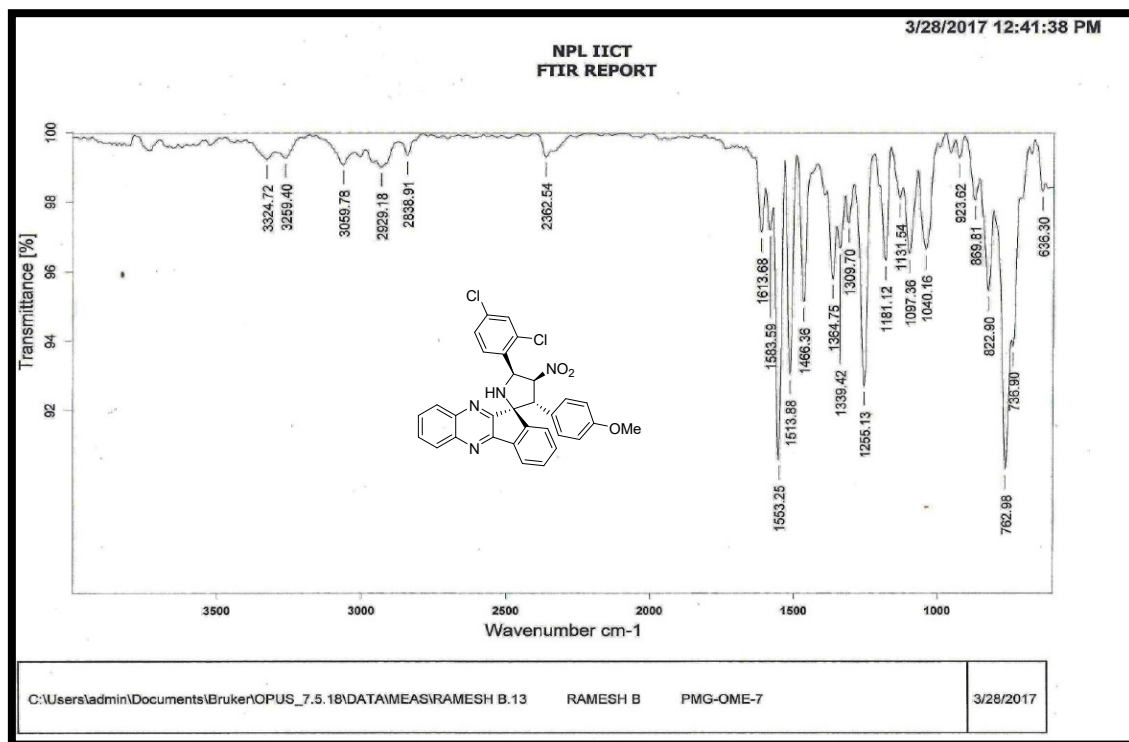

<sup>1</sup>H NMR Spectrum (CDCl<sub>3</sub>, 400 MHz) of compound 5m

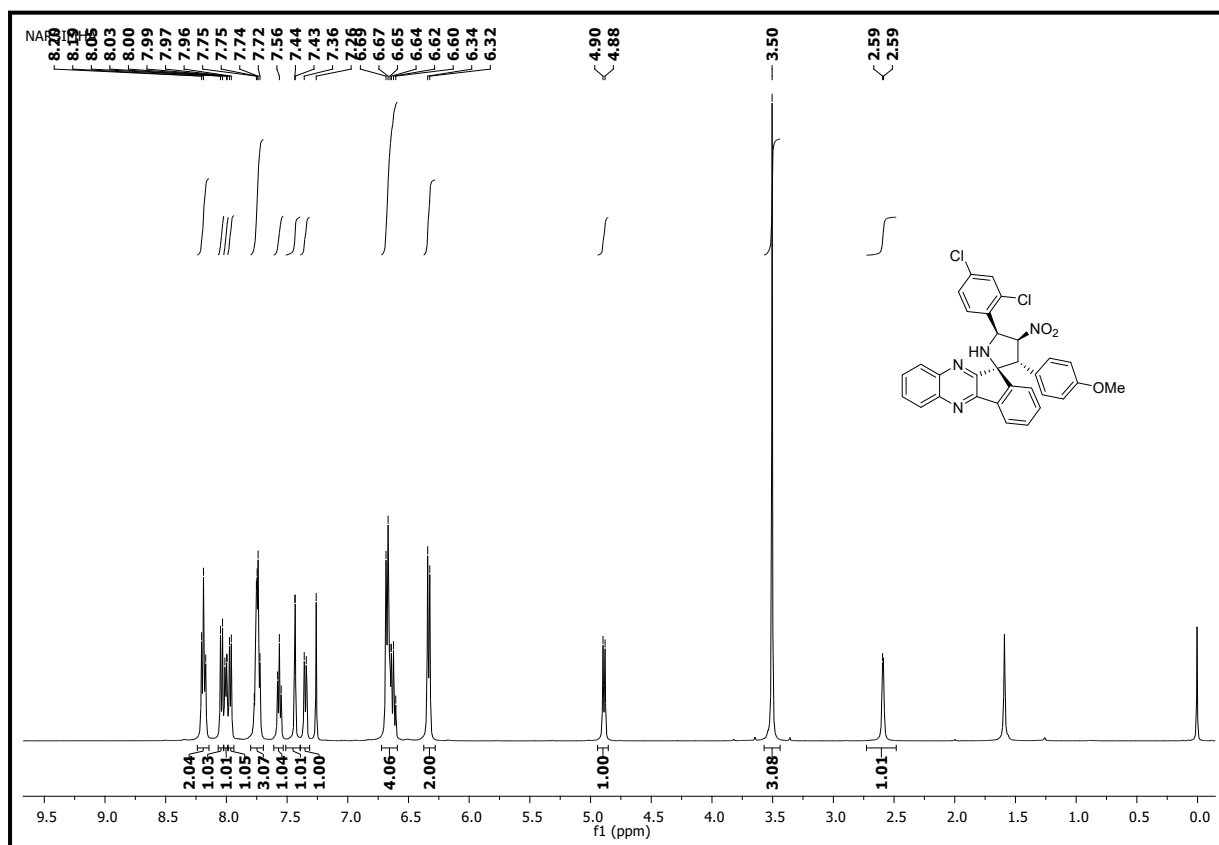

<sup>13</sup>C NMR Spectrum (CDCl<sub>3</sub>, 100 MHz) of compound 5m

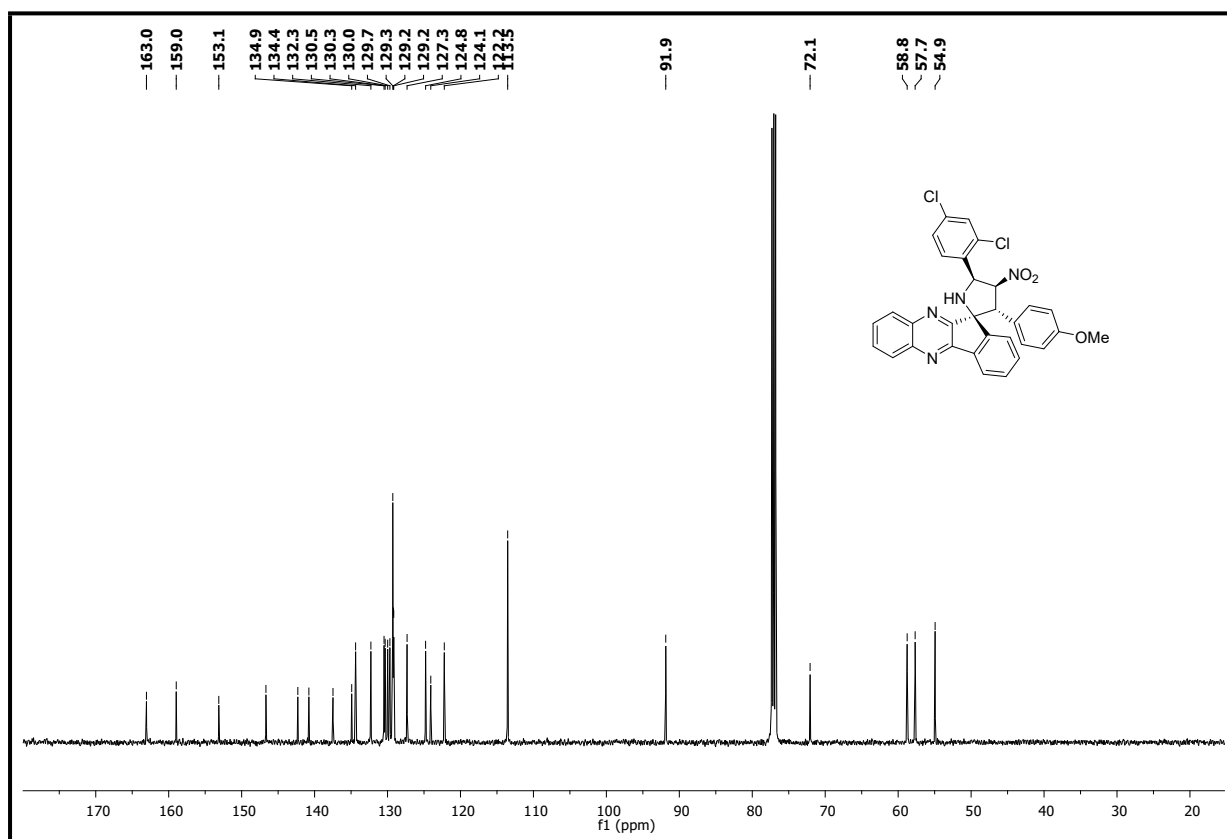

HR-ESIM Spectrum of compound 5n

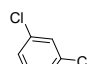

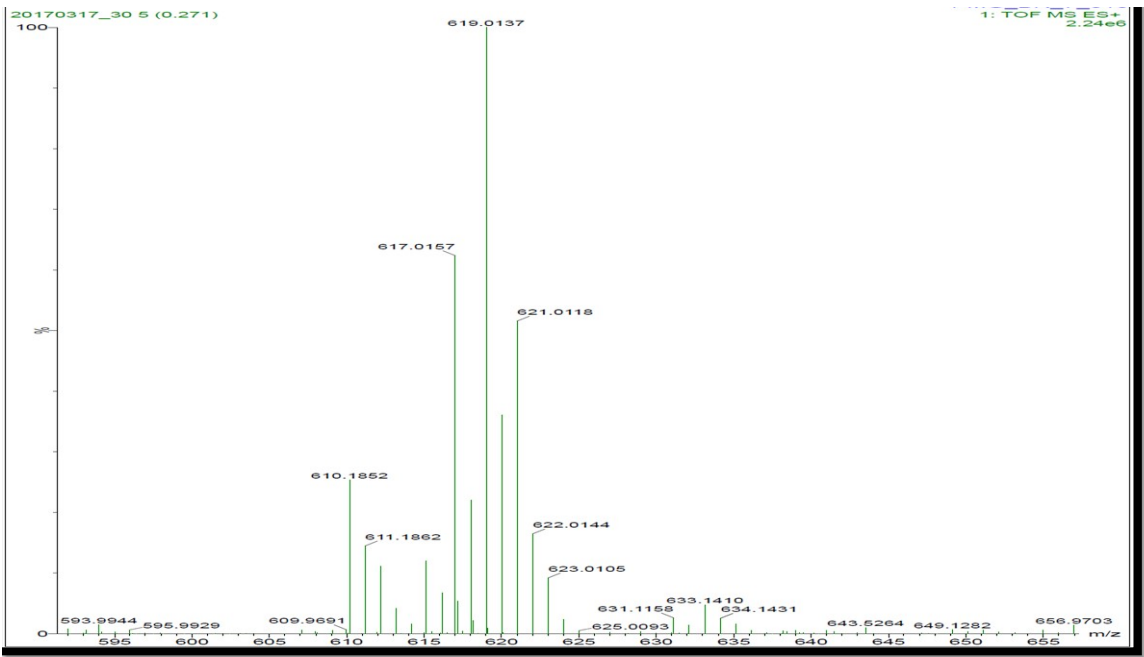

98 formula(e) evaluated with 1 results within limits (up to 50 closest results for each mass)  
 Elements Used:  
 C: 0-31 H: 0-23 N: 0-4 O: 0-3 Cl: 0-2 Br: 0-1

20170317\_30 5 (0.271) PMG\_BR\_7\_616  
2.24e+006

1: TOF MS ES+

| m/z      | Relative Intensity |
|----------|--------------------|
| 593.9944 | ~1                 |
| 595.9929 | ~1                 |
| 609.9691 | ~1                 |
| 610.1852 | ~10                |
| 611.1862 | ~5                 |
| 617.0157 | ~30                |
| 619.0137 | 100                |
| 621.0118 | ~25                |
| 622.0144 | ~5                 |
| 623.0105 | ~3                 |
| 625.0093 | ~1                 |
| 631.1158 | ~1                 |
| 633.1410 | ~1                 |
| 634.1431 | ~1                 |
| 643.5264 | ~1                 |
| 649.1282 | ~1                 |
| 656.9703 | ~1                 |

Minimum: 5.0 10.0 -1.5  
 Maximum: 50.0 50.0 50.0

| Mass     | Calc. Mass | mDa | PPM | DBE  | i-FIT | Norm | Conf (%) | Formula              |
|----------|------------|-----|-----|------|-------|------|----------|----------------------|
| 617.0157 | 617.0147   | 1.0 | 1.6 | 21.5 | 119.3 | n/a  | n/a      | C39 H20 N4 O3 Cl2 Br |

### IR Spectrum of compound 5n

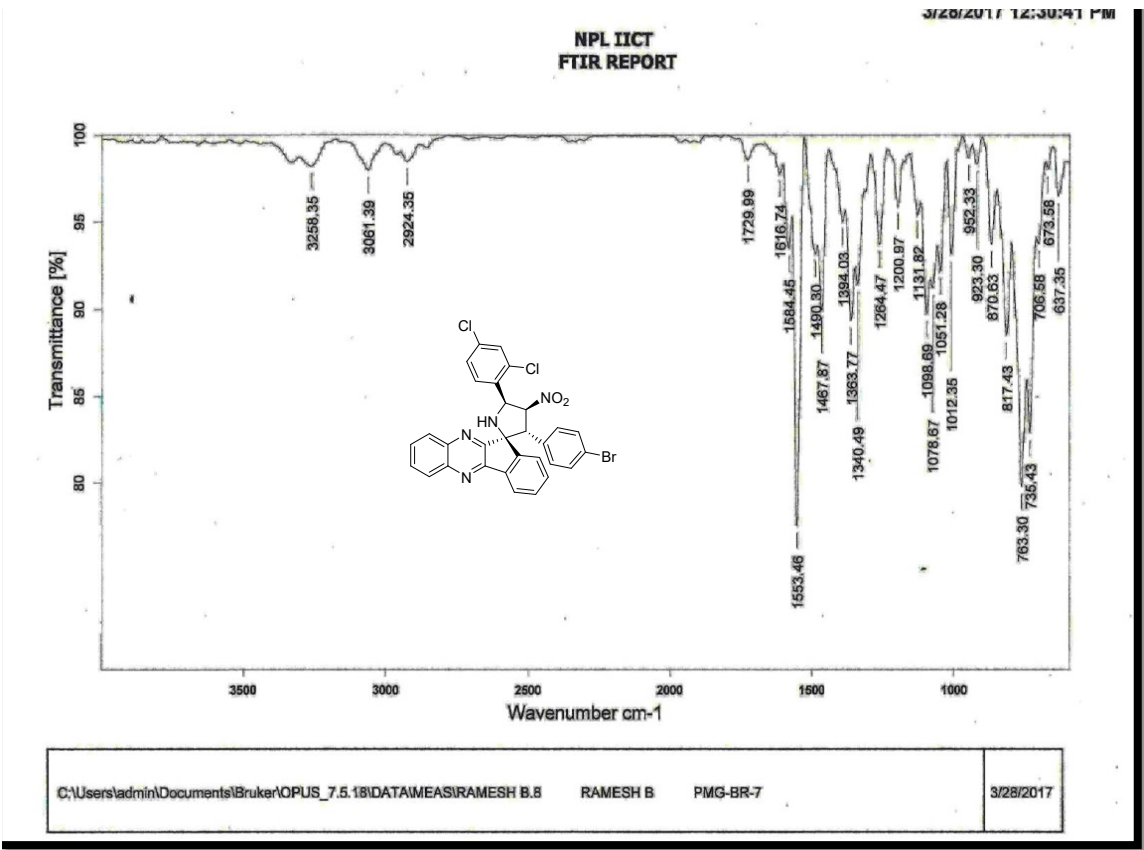

### <sup>1</sup>H NMR Spectrum (CDCl<sub>3</sub>, 500 MHz) of compound 5n

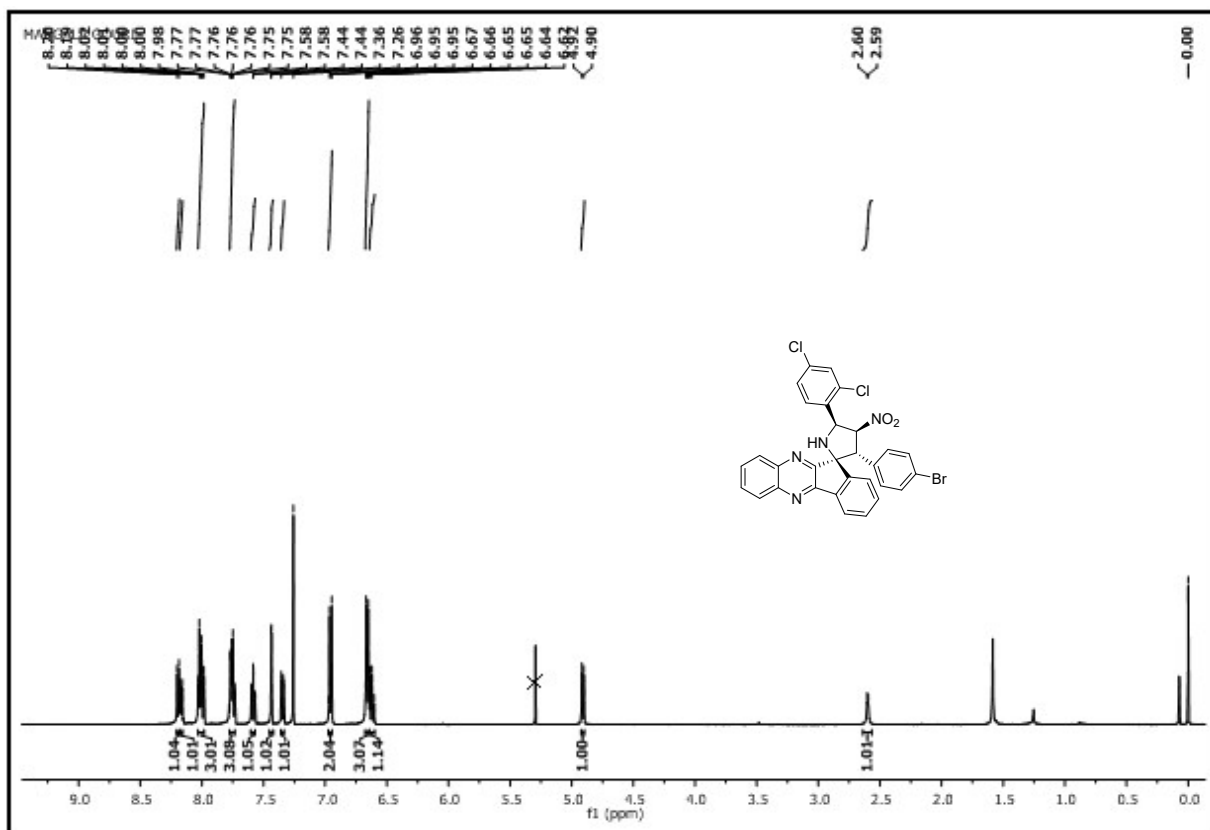

**<sup>13</sup>C NMR Spectrum (CDCl<sub>3</sub>, 125 MHz) of compound 5n**

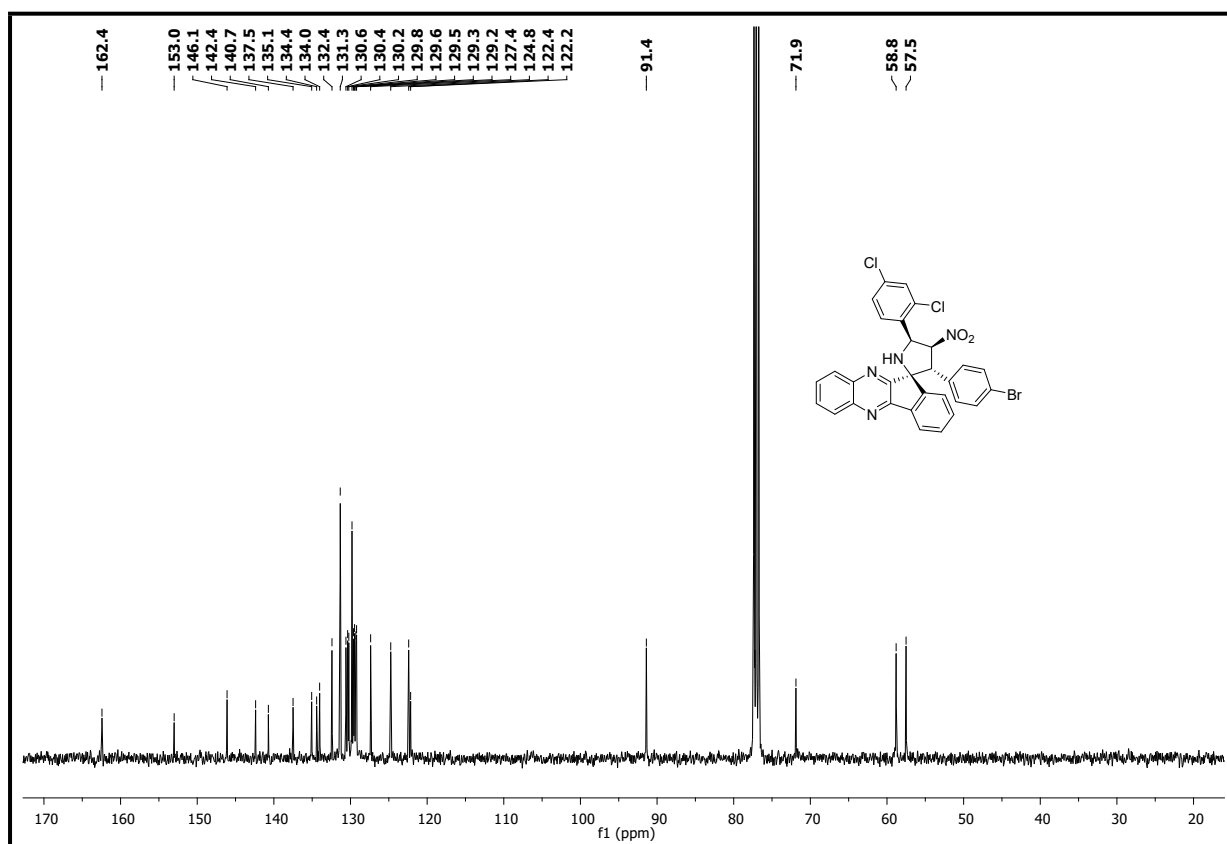

**HR-ESIM Spectrum of compound 5o**

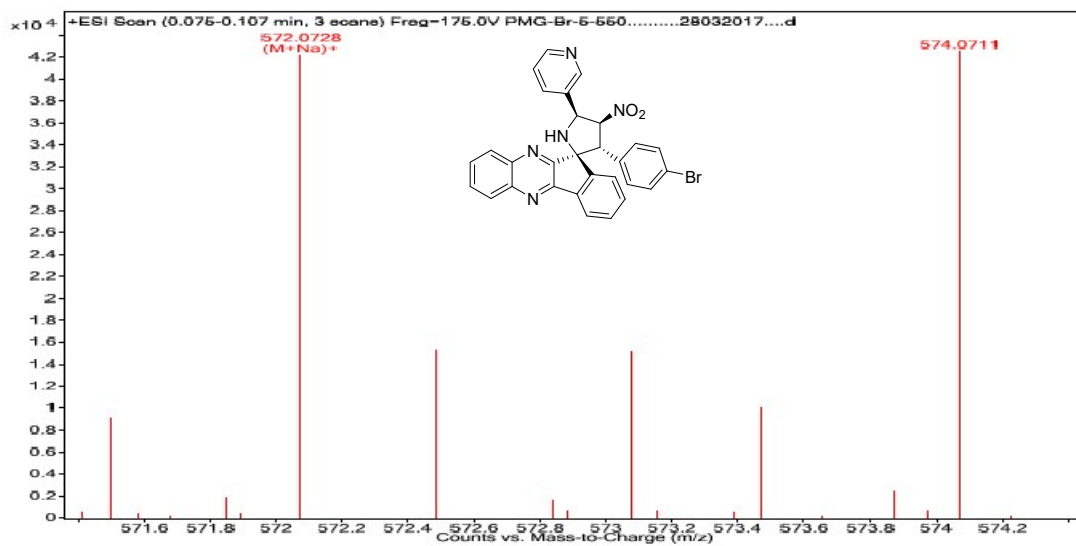

MS Formula Results: + Scan (0.075-0.107 min) (PMG-Br-5-550.....28032017.....d)

| m/z      | Ion     | Formula      | Abundance |
|----------|---------|--------------|-----------|
| 572.0728 | (M+Na)+ | C29H20BrN5O2 | 42108     |

  

| Det | Formula (M)  | Ion Formula    | Calc m/z | Score | Crab Score | Mass     | Calc Mass | Diff (ppm) | Ala Diff (ppm) | Abund Match | Spacing Match | Mass Match | m/z      | DBE |
|-----|--------------|----------------|----------|-------|------------|----------|-----------|------------|----------------|-------------|---------------|------------|----------|-----|
| ✓   | C29H20BrN5O2 | C29H20BrN5NaO2 | 572.0693 | 80.61 |            | 549.0636 | 549.06    | -6.4       | 6.4            | 95.82       | 96.84         | 63.37      | 572.0728 | 22  |

### IR Spectrum of compound 5o

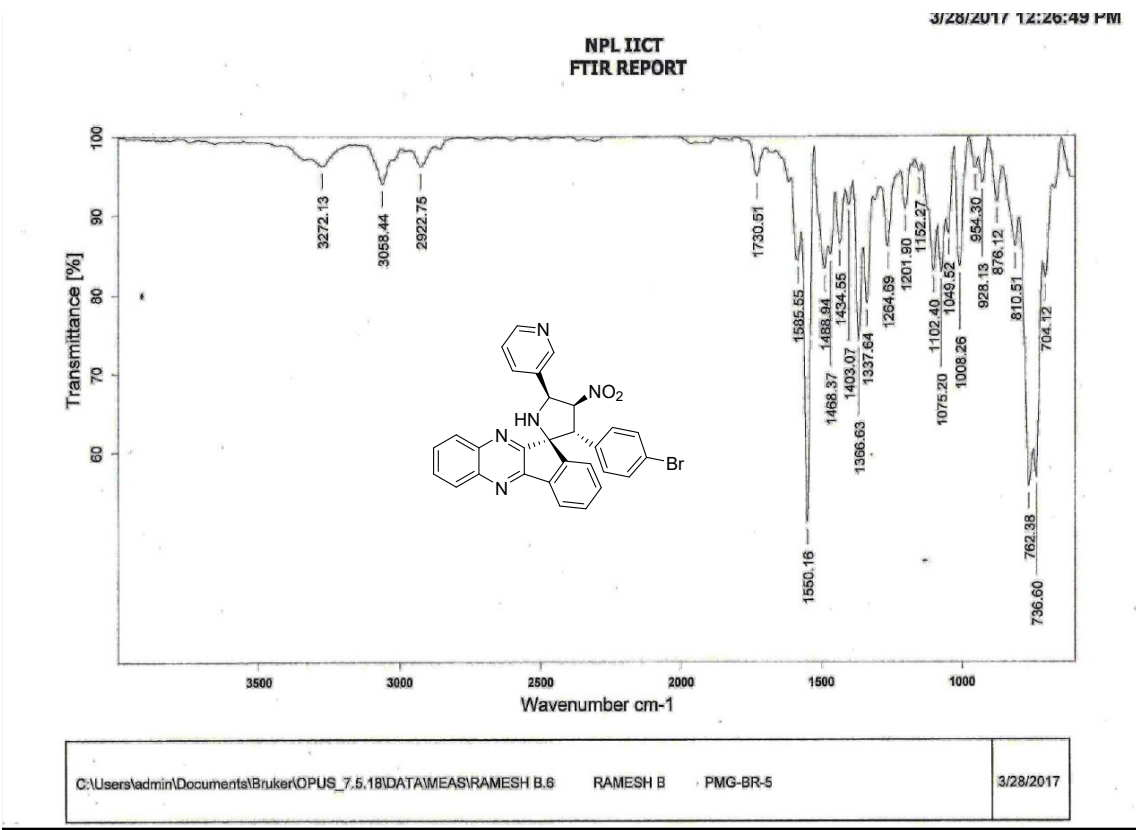

### <sup>1</sup>H NMR Spectrum (CDCl<sub>3</sub>, 500 MHz) of compound 5o

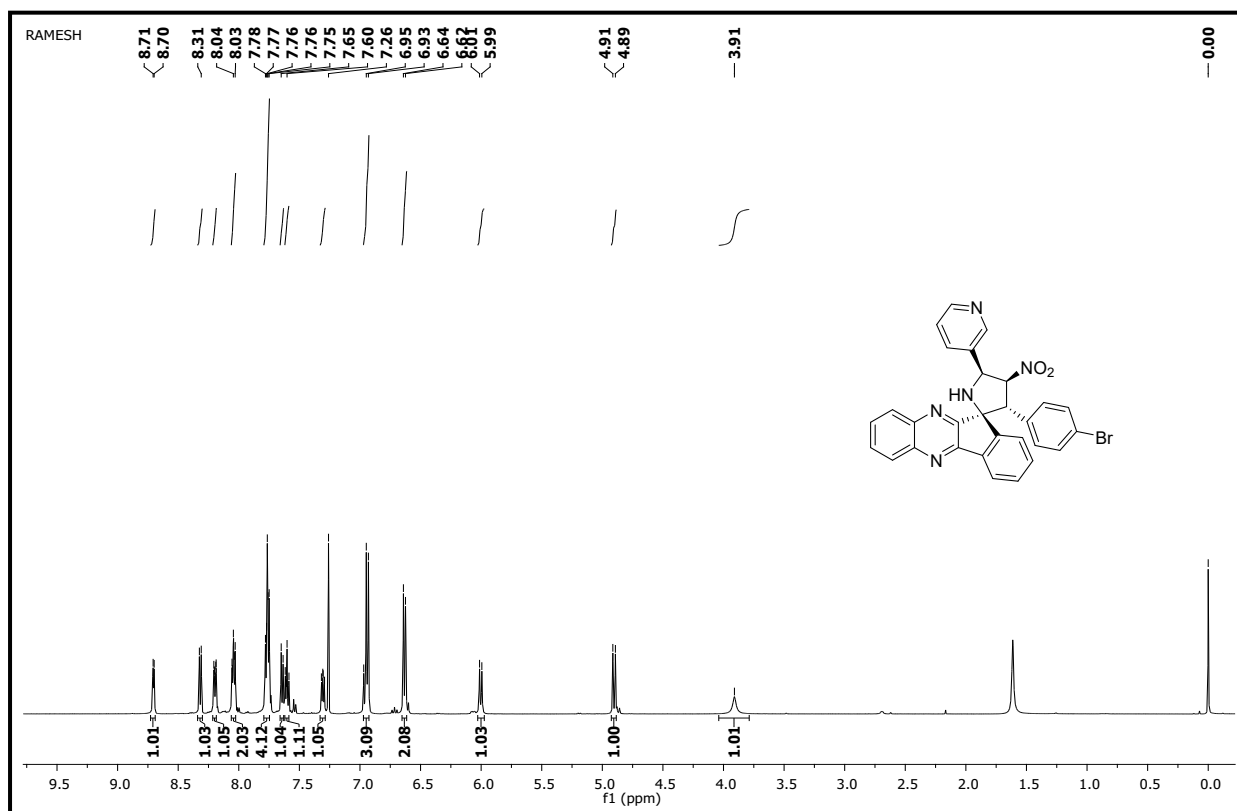

**<sup>13</sup>C NMR Spectrum (CDCl<sub>3</sub>, 125 MHz) of compound 5o**

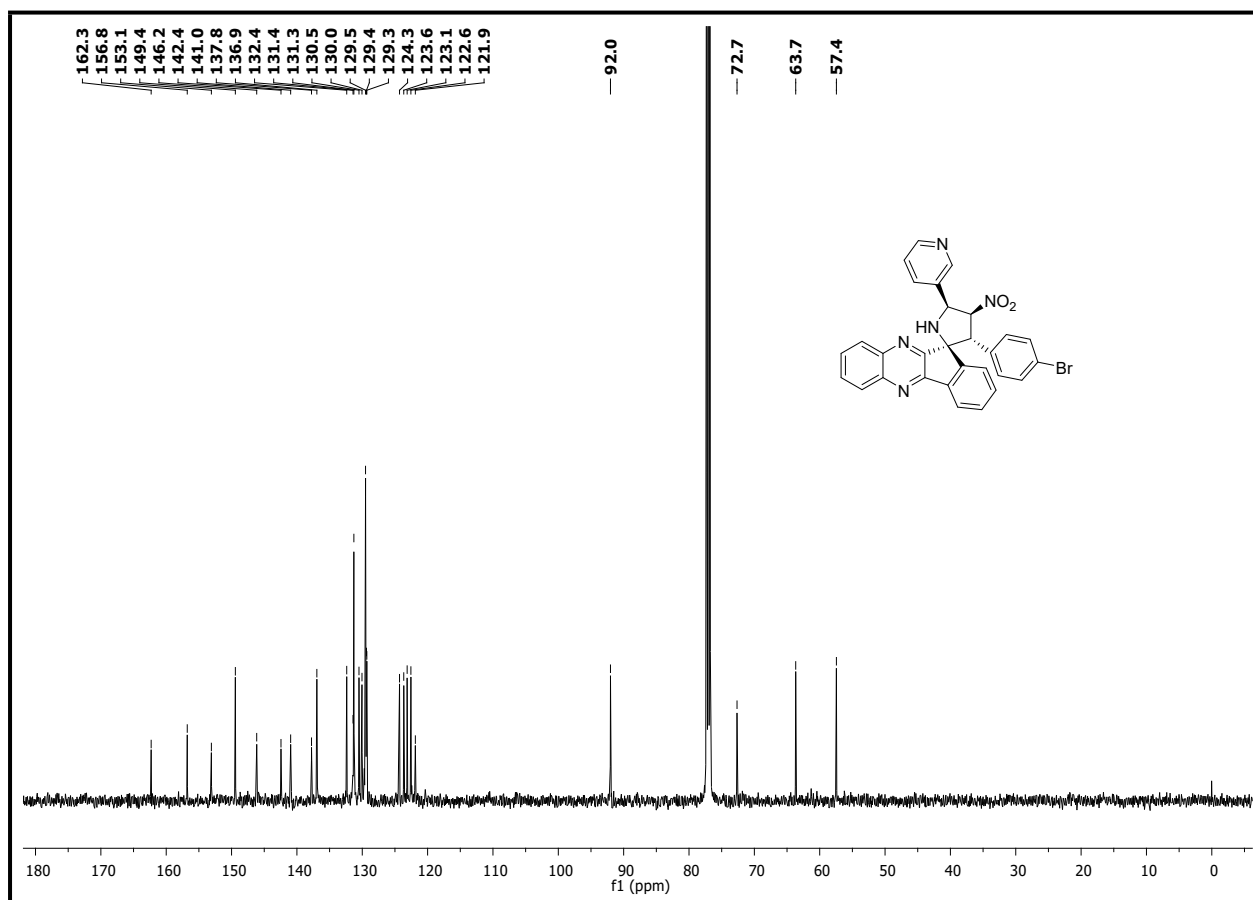

**HR-ESIM Spectrum of compound 7a**

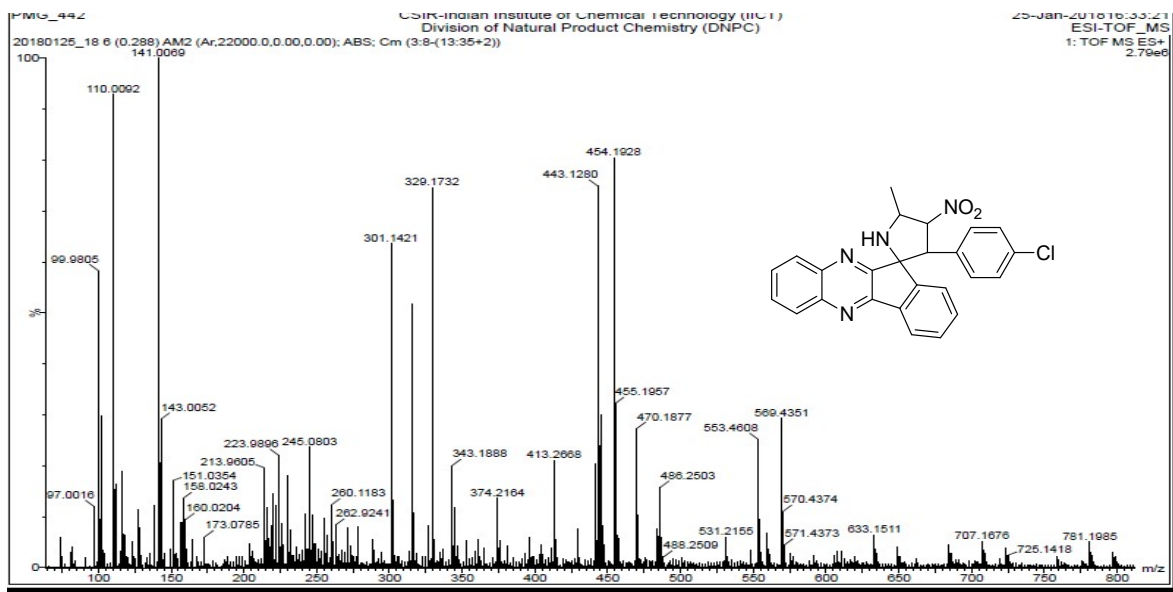

### Elemental Composition Report

#### Single Mass Analysis

Tolerance = 5.0 PPM / DBE: min = -1.5, max = 50.0

Element prediction: Off

Number of isotope peaks used for i-FIT = 3

Monoisotopic Mass, Even Electron Ions

16 formula(e) evaluated with 1 results within limits (up to 10 closest results for each mass)

Elements Used:

C: 0-27 H: 0-20 N: 0-4 O: 0-2 Cl: 0-1

| Minimum: | 8.0        | 8.0 | -1.5 |      |       |      |         |                  |  |
|----------|------------|-----|------|------|-------|------|---------|------------------|--|
| Maximum: | 8.0        | 8.0 | 50.0 |      |       |      |         |                  |  |
| Mass     | Calc. Mass | mDa | PPM  | DBE  | i-FIT | Norm | Conf(%) | Formula          |  |
| 443.1280 | 443.1275   | 0.5 | 1.1  | 17.5 | 276.8 | n/a  | n/a     | C25 H20 N4 O2 Cl |  |

### IR Spectrum of compound 7a

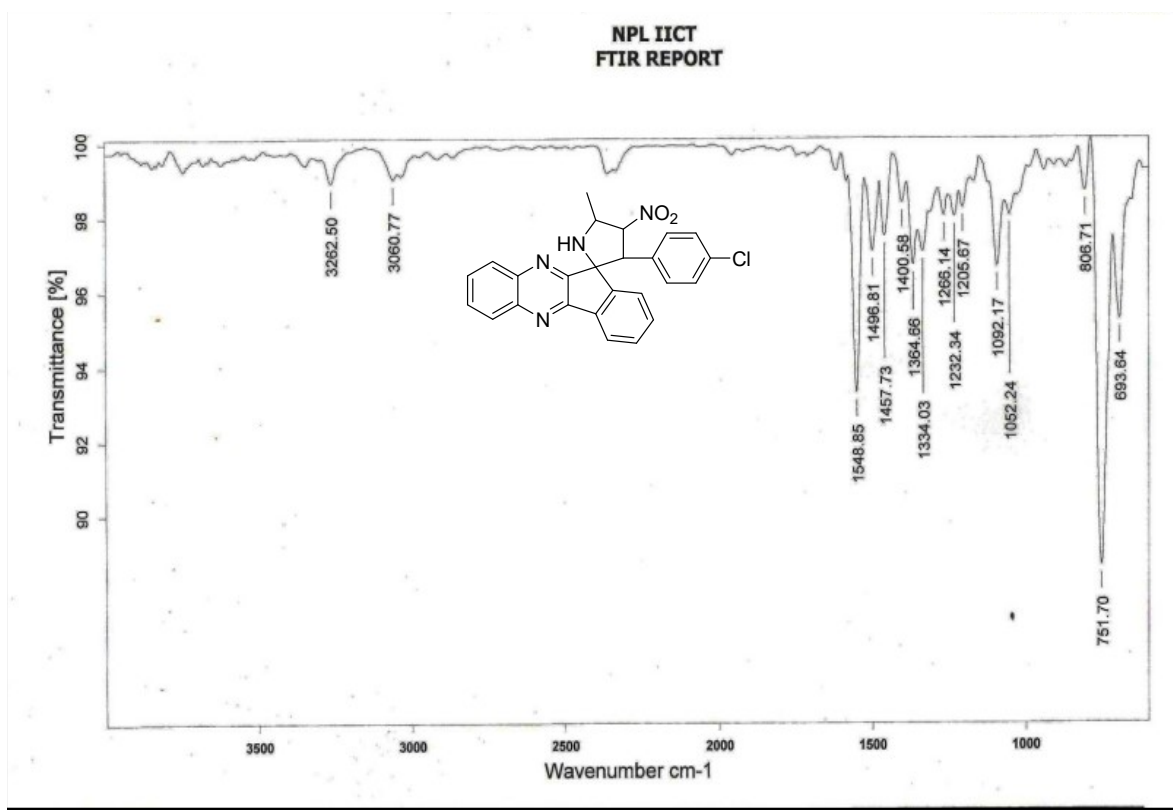

### <sup>1</sup>H NMR Spectrum (CDCl<sub>3</sub>, 500 MHz) of compound 7a



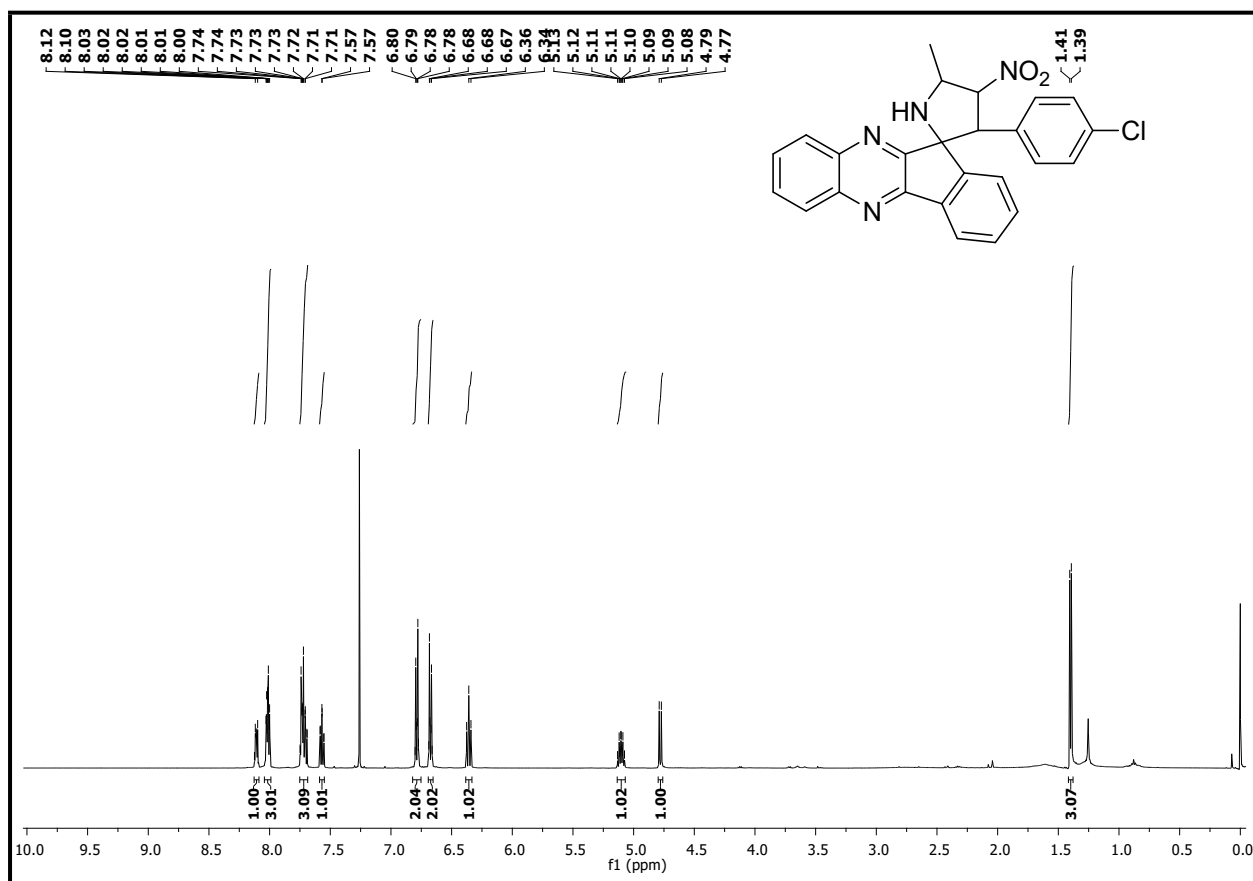

**<sup>13</sup>C NMR Spectrum (CDCl<sub>3</sub>, 100 MHz) of compound 7a**

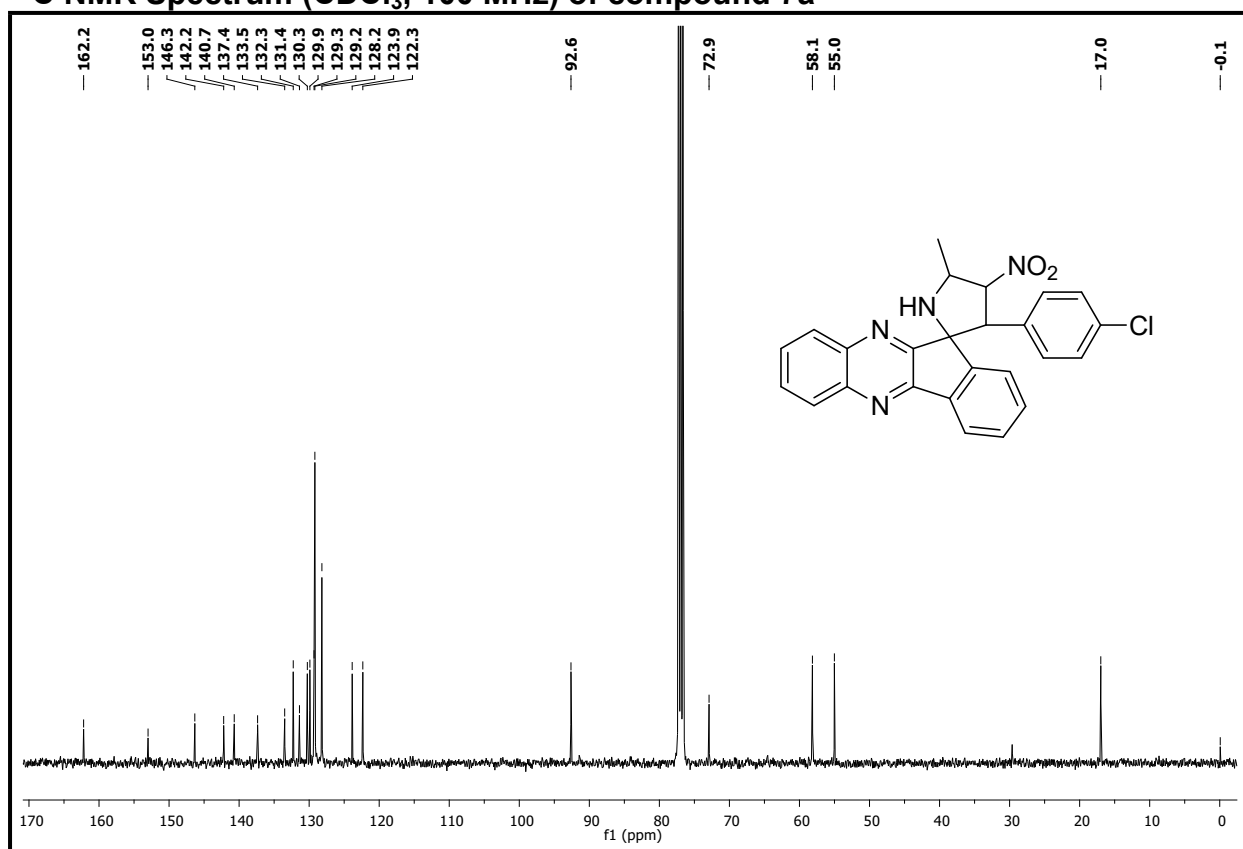

**ESIM Spectrum of compound 7b**

Sample Name : PMG-VCL-470  
Data File : 110418.50.icd  
Date Acquired : 4/11/2018 1:00:38 PM  
Batch File : 11-04-2018.icb

MS Spectrum  
D:\DATA\APRIL-2018\110418.50.icd

Averaged ESI Positive  
Spectrum Mode: Averaged 0.125-0.144(61-166)

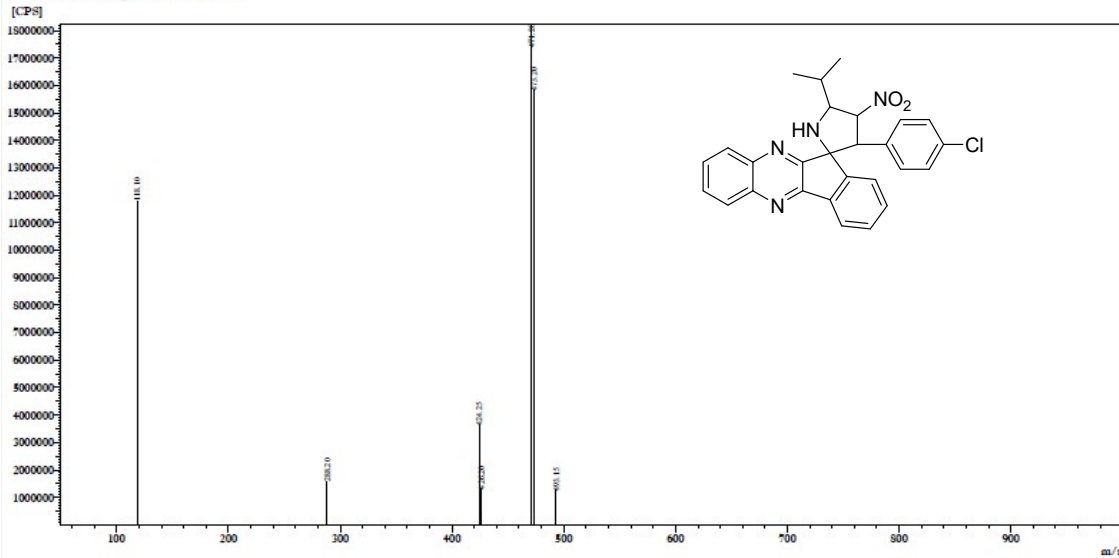

IR Spectrum of compound 7b

3/28/2017 12:46:22 PM

NPL IICT  
FTIR REPORT

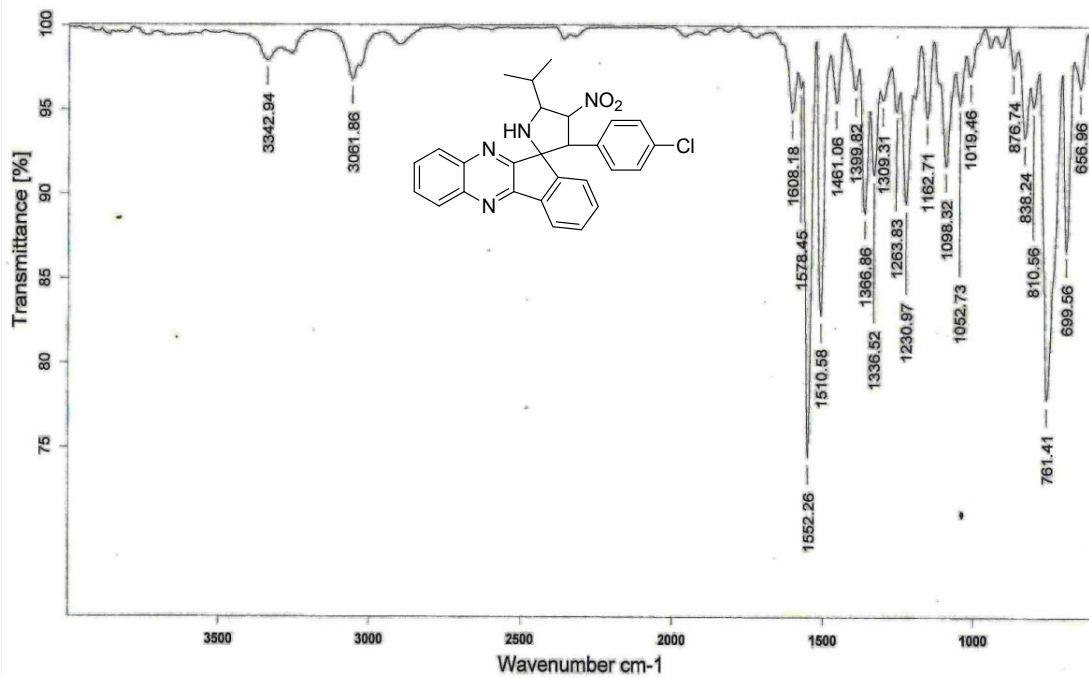

### <sup>1</sup>H NMR Spectrum (CDCl<sub>3</sub>, 400 MHz) of compound 7b

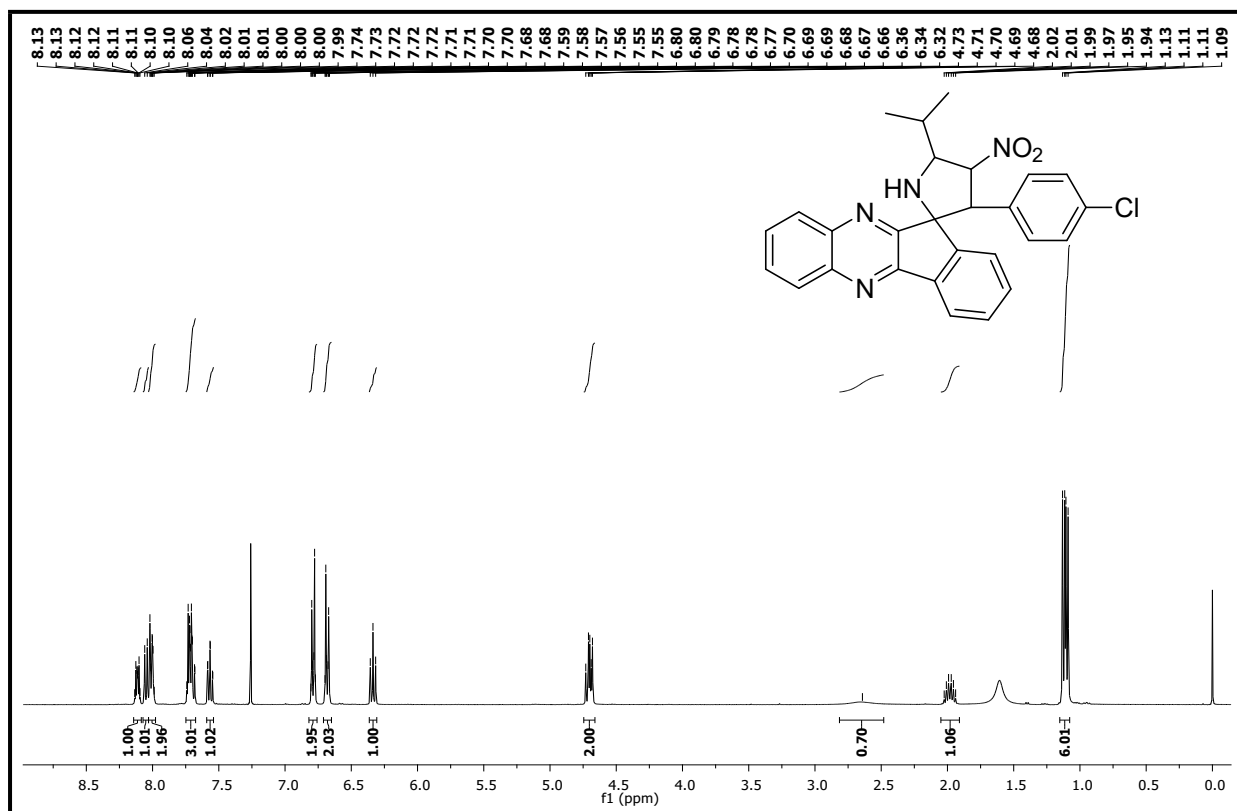

### <sup>13</sup>C NMR Spectrum (CDCl<sub>3</sub>, 100 MHz) of compound 7b

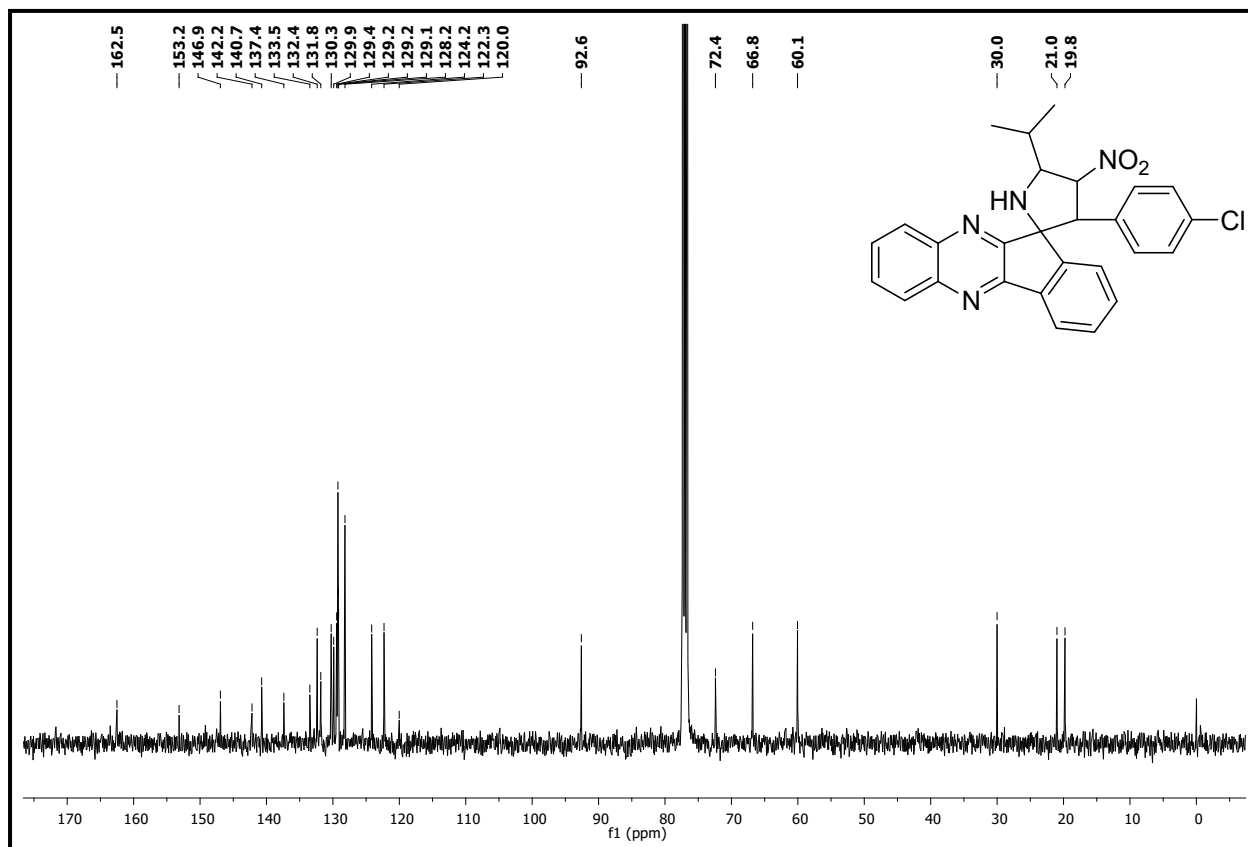

# ESIM Spectrum of compound 7c

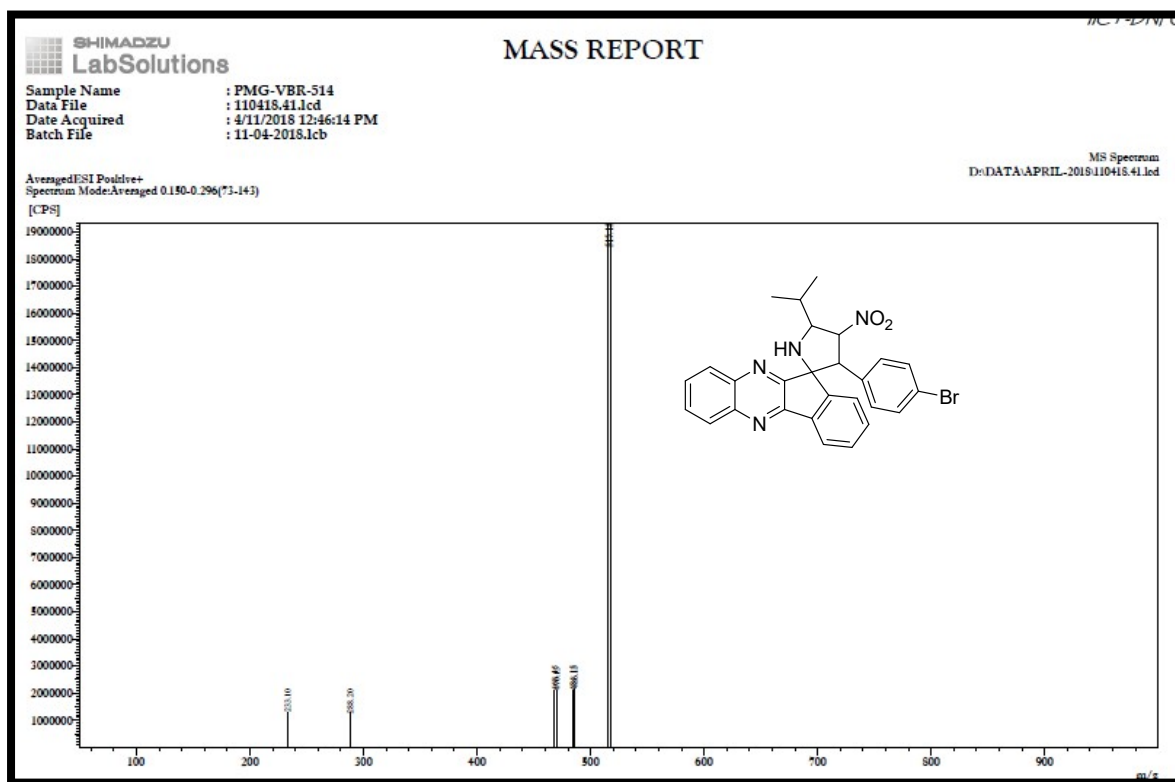

# IR Spectrum of compound 7c

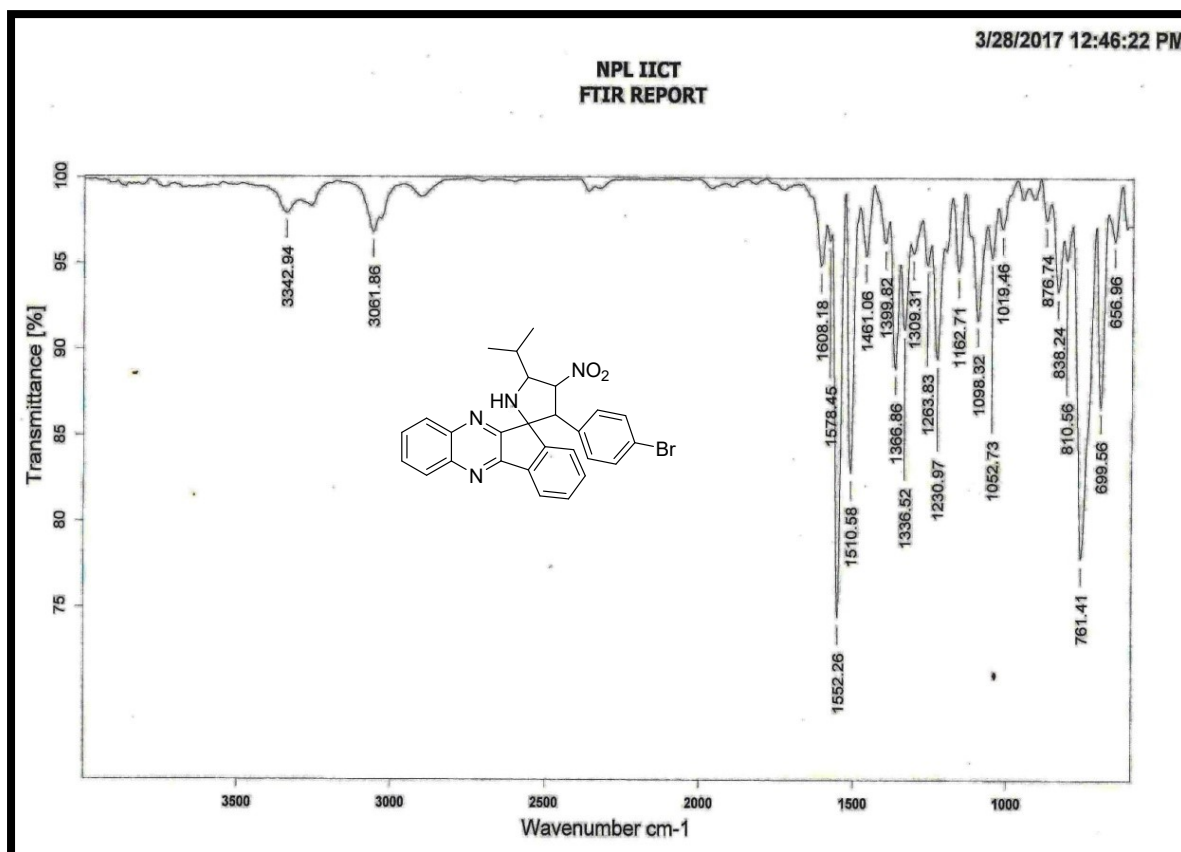

### <sup>1</sup>H NMR Spectrum (CDCl<sub>3</sub>, 400 MHz) of compound 7c

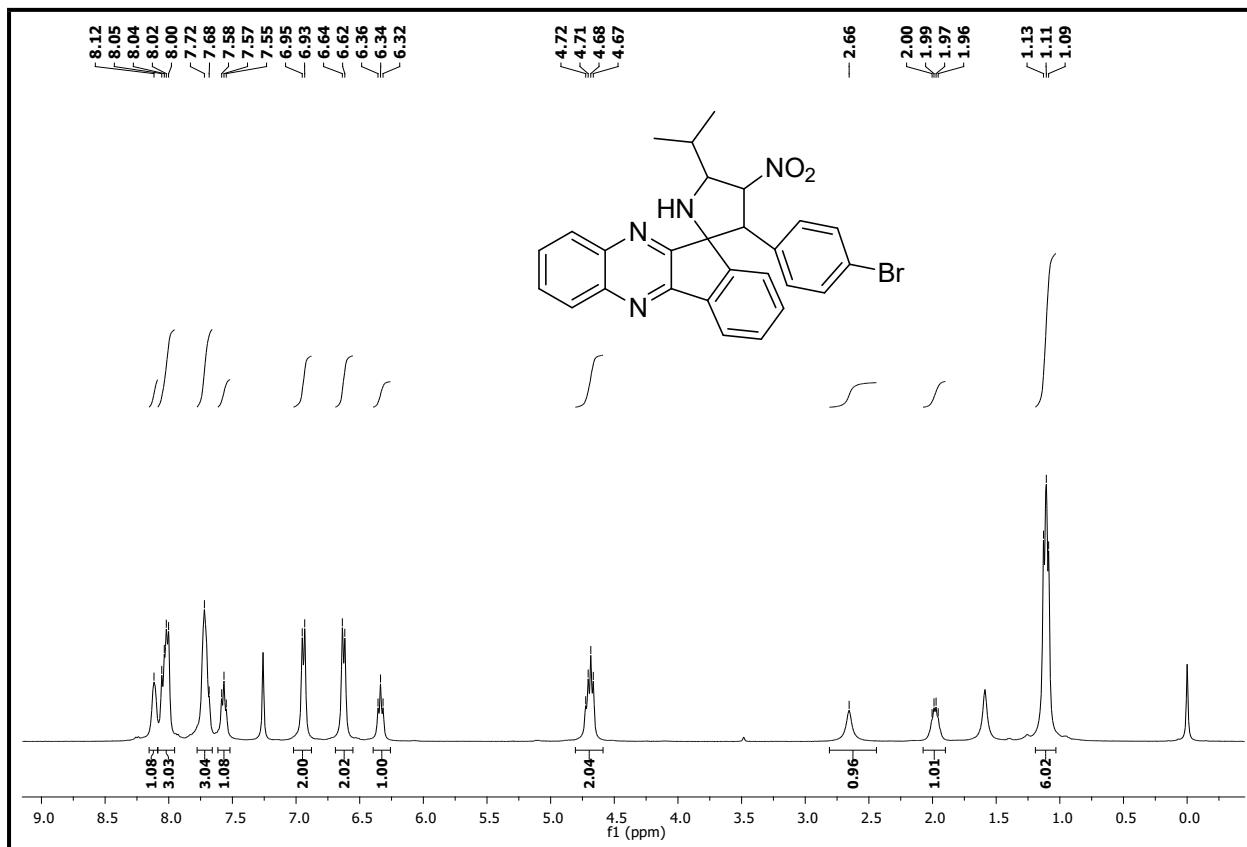

### <sup>13</sup>C NMR Spectrum (CDCl<sub>3</sub>, 100 MHz) of compound 7c

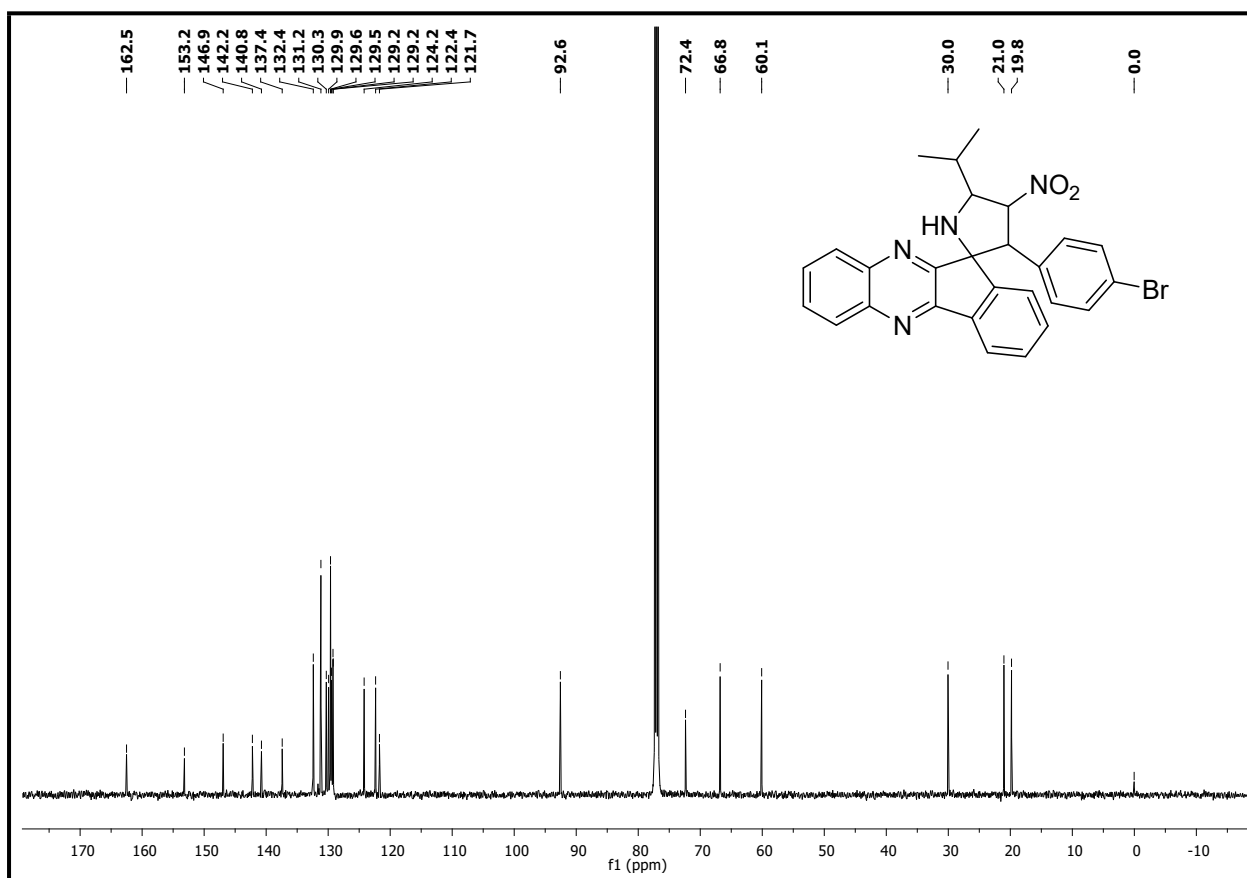

## HR-ESIM Spectrum of compound 7d

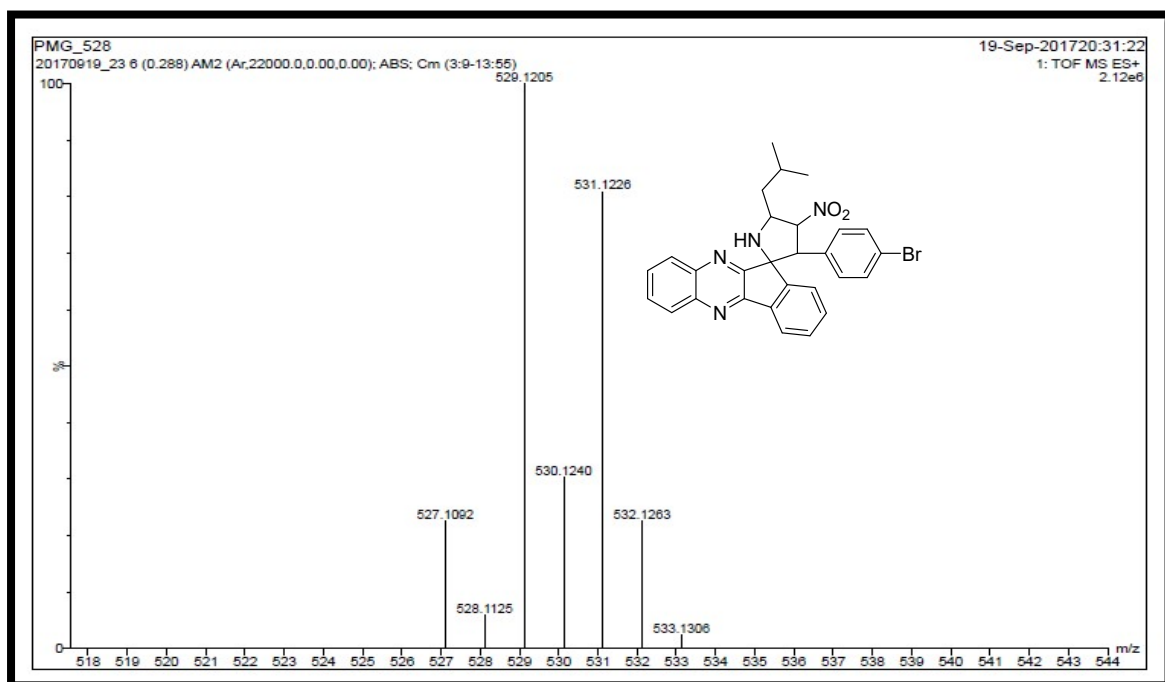

### Elemental Composition Report

#### Single Mass Analysis

Tolerance = 20.0 PPM / DBE: min = 1.0, max = 50.0  
Element prediction: Off  
Number of isotope peaks used for i-FIT = 3

Monoisotopic Mass, Even Electron Ions

99 formula(e) evaluated with 1 results within limits (up to 10 closest results for each mass)

Elements Used:

C: 0-28 H: 0-27 N: 0-5 O: 0-5 Br: 0-1

PMG\_528  
20170919\_23 6 (0.288) AM2 (Ar,22000.0,0.00,0.00); ABS: Cm (3:9-13:55)

19-Sep-201720:31:22

1: TOF MS ES+  
2.12e+006

| m/z      | 527.0 | 527.1092   | 528.0 | 528.1125 | 529.0 | 529.1205 | 530.0 | 530.1240 | 531.0            | 531.1226 | 532.0 | 532.1263 | 533.0 | 533.1306 | 538.0 | 538.2173 |
|----------|-------|------------|-------|----------|-------|----------|-------|----------|------------------|----------|-------|----------|-------|----------|-------|----------|
| Minimum: |       |            | 5.0   |          | 20.0  |          | 10.0  |          | 50.0             |          |       |          |       |          |       |          |
| Maximum: |       |            |       |          |       |          |       |          |                  |          |       |          |       |          |       |          |
| Mass     |       | Calc. Mass | mDa   | PPM      | DBE   | i-FIT    | Norm  | Conf (%) | Formula          |          |       |          |       |          |       |          |
| 529.1205 |       | 529.1239   | -3.4  | -6.4     | 17.5  | 37.5     | n/a   | n/a      | C28 H26 N4 O2 Br |          |       |          |       |          |       |          |

## R Spectrum of compound 7d

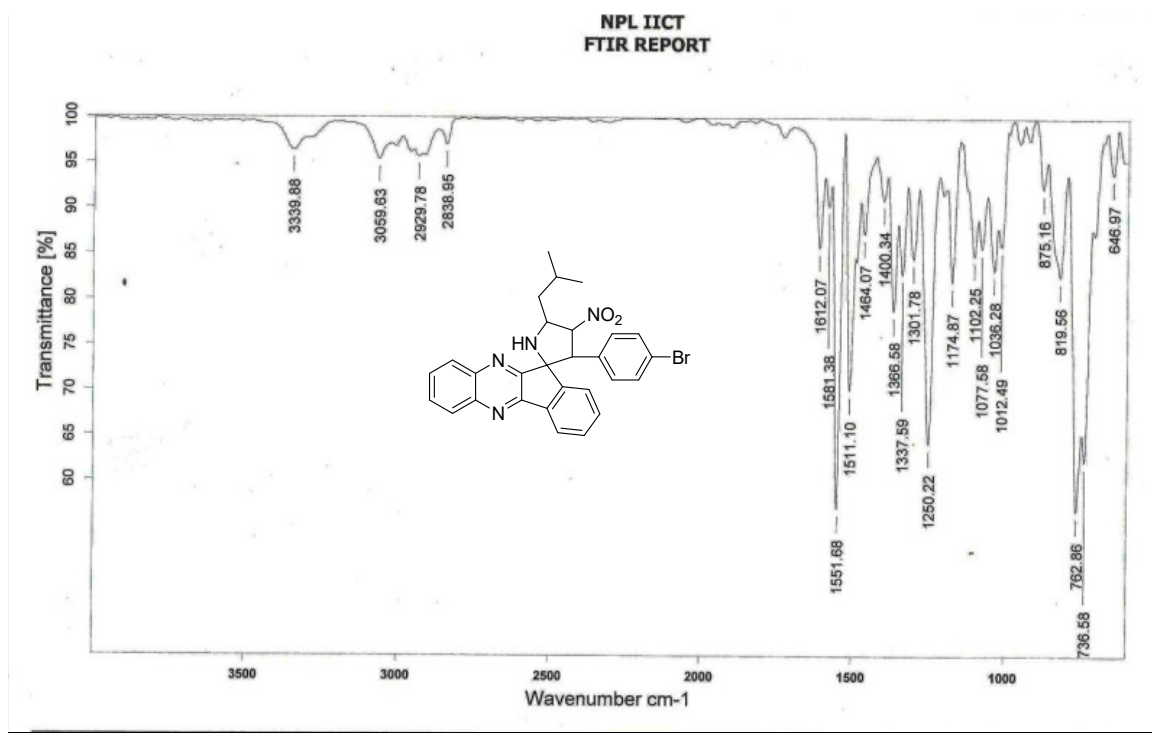

### <sup>1</sup>H NMR Spectrum (CDCl<sub>3</sub>, 400 MHz) of compound 7d

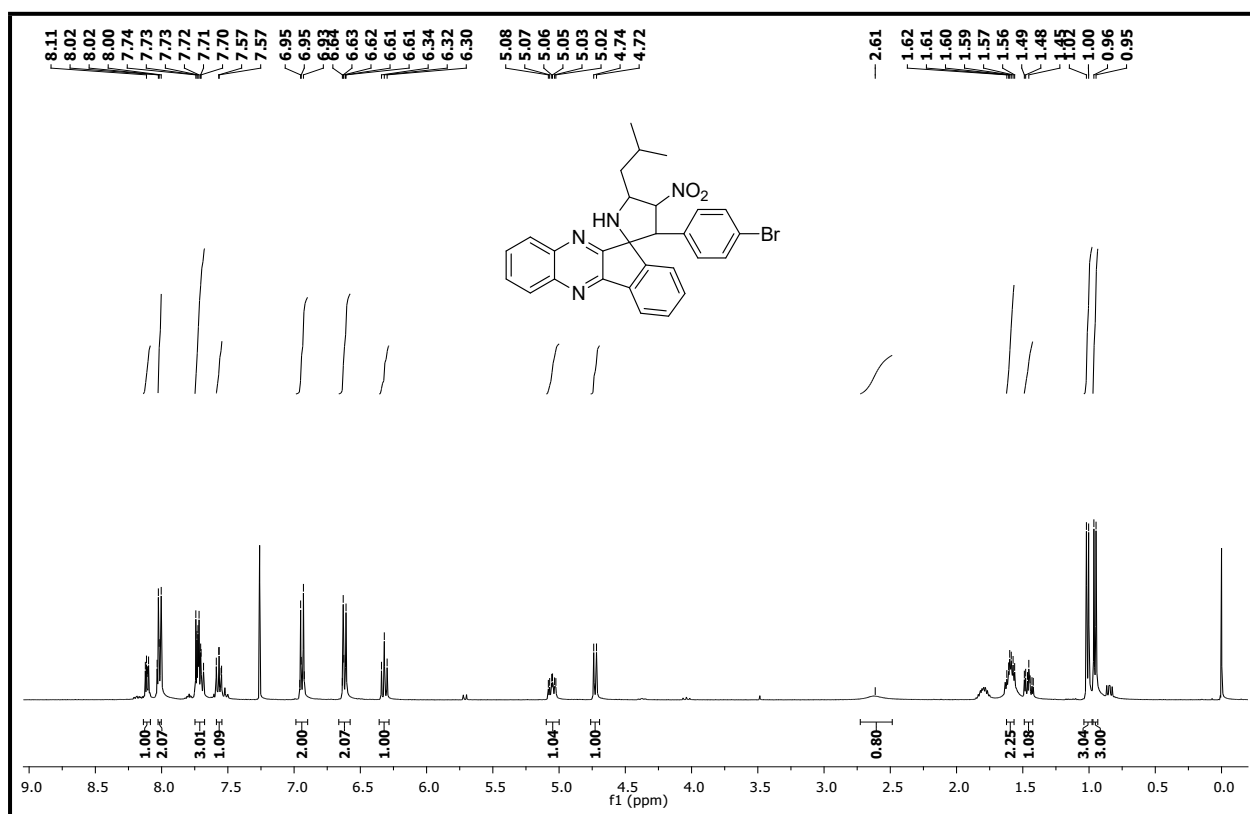

### <sup>13</sup>C NMR Spectrum (CDCl<sub>3</sub>, 100 MHz) of compound 7d

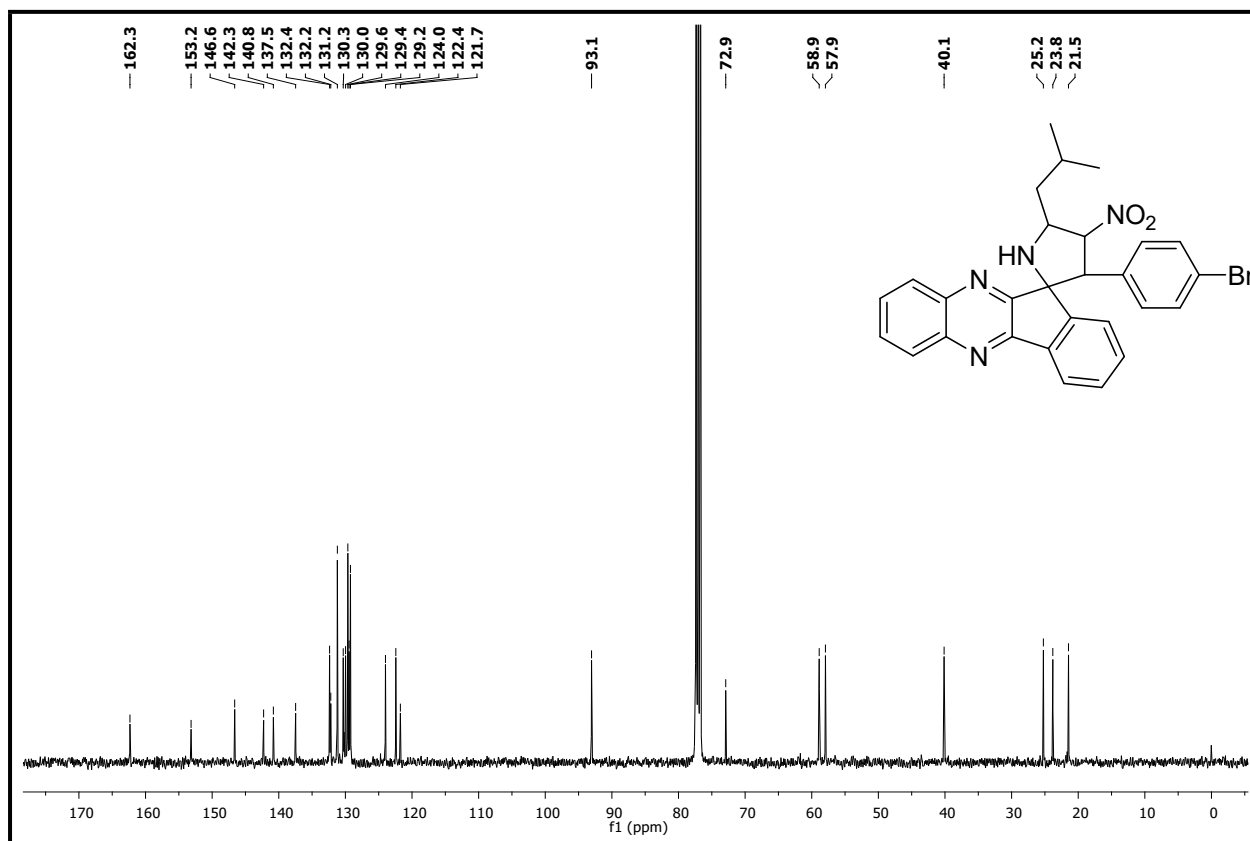

## HR-ESIM Spectrum of compound 7e

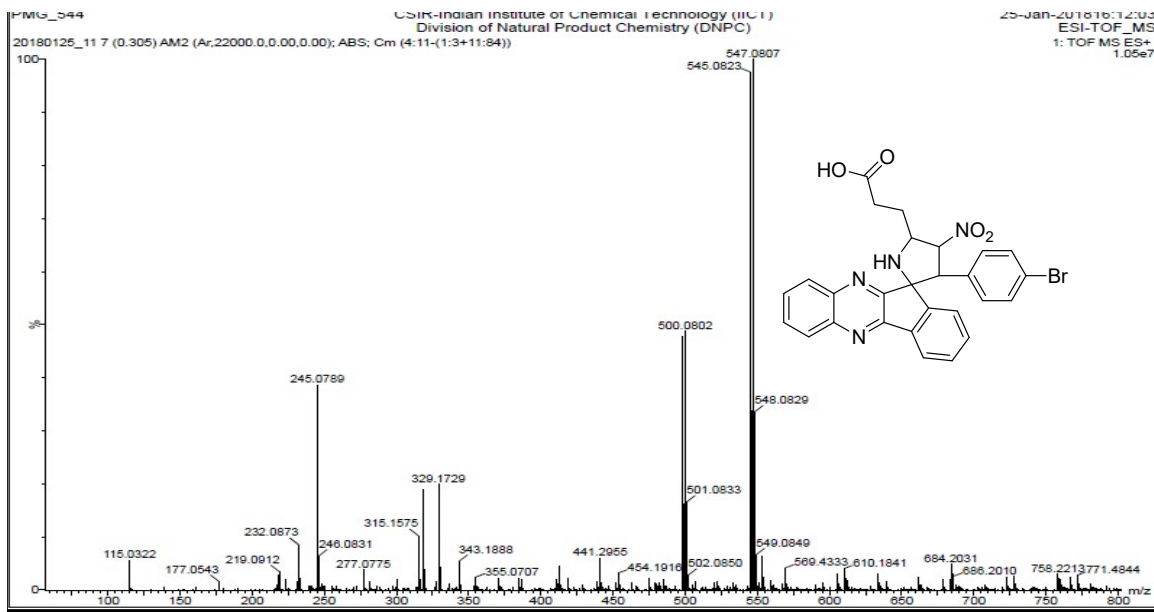

### Single Mass Analysis

Tolerance = 5.0 ppm / DBE: min = -1.5, max = 50.0

Element prediction: Off

Number of isotope peaks used for i-FIT = 3

Monoisotopic Mass, Even Electron Ions

50 formulae evaluated with 1 results within limits (up to 10 closest results for each mass)

Elements Used:

C: 0-27 H: 0-22 N: 0-4 O: 0-5 Br: 0-1

| Mass     | Calc. Mass | mDa  | ppm  | DBE  | i-FIT | Norm | Conf (%) | Formula          |
|----------|------------|------|------|------|-------|------|----------|------------------|
| 545.0823 | 545.0824   | -0.1 | -0.2 | 18.5 | 102.7 | n/a  | n/a      | C27 H22 N4 O4 Br |

## IR Spectrum of compound 7e

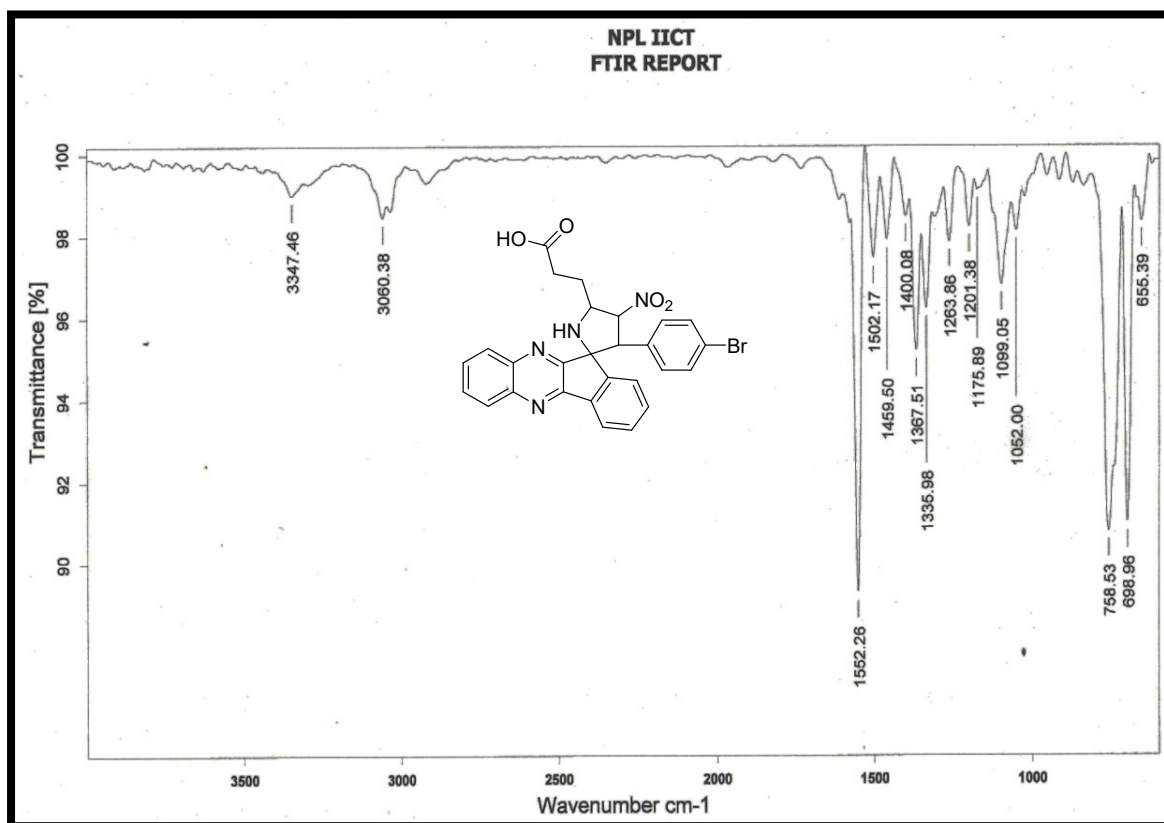



**<sup>1</sup>H NMR Spectrum (CDCl<sub>3</sub>, 400 MHz) of compound 7e**

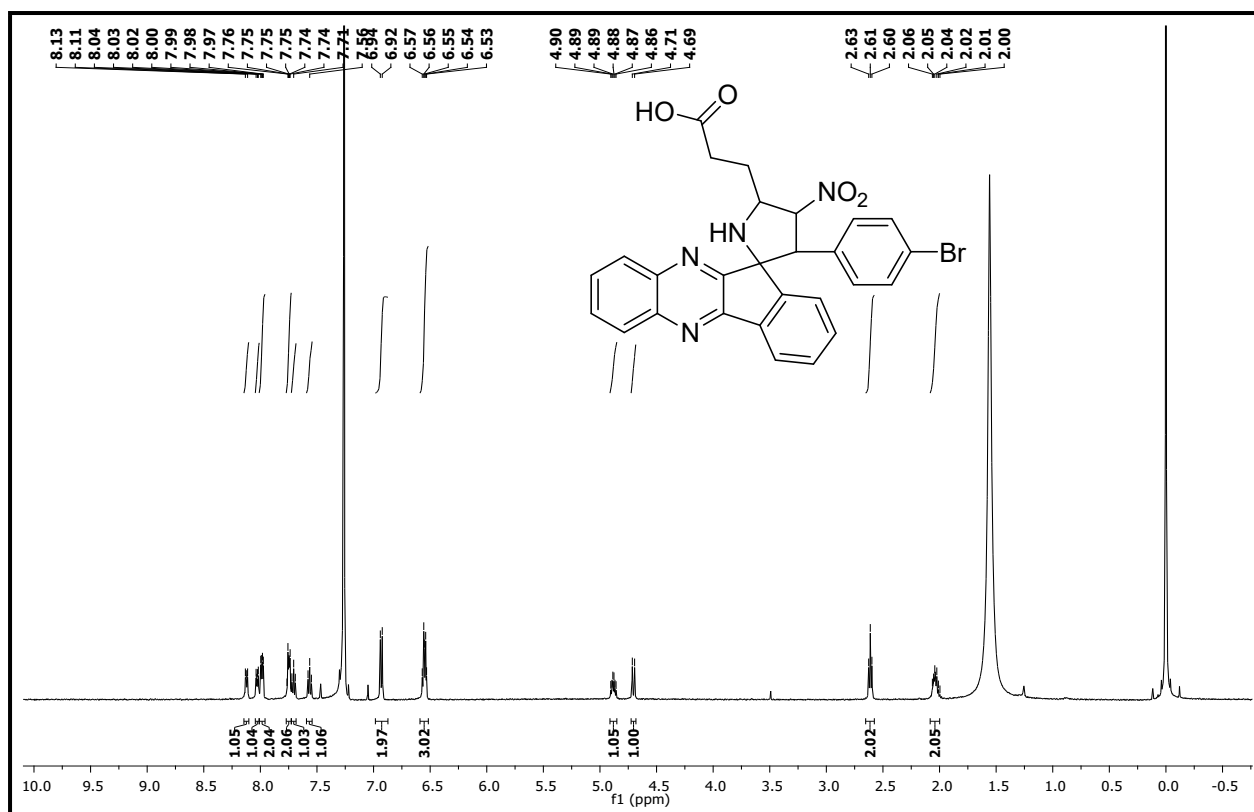

**<sup>13</sup>C NMR Spectrum (CDCl<sub>3</sub>, 100 MHz) of compound 7e**

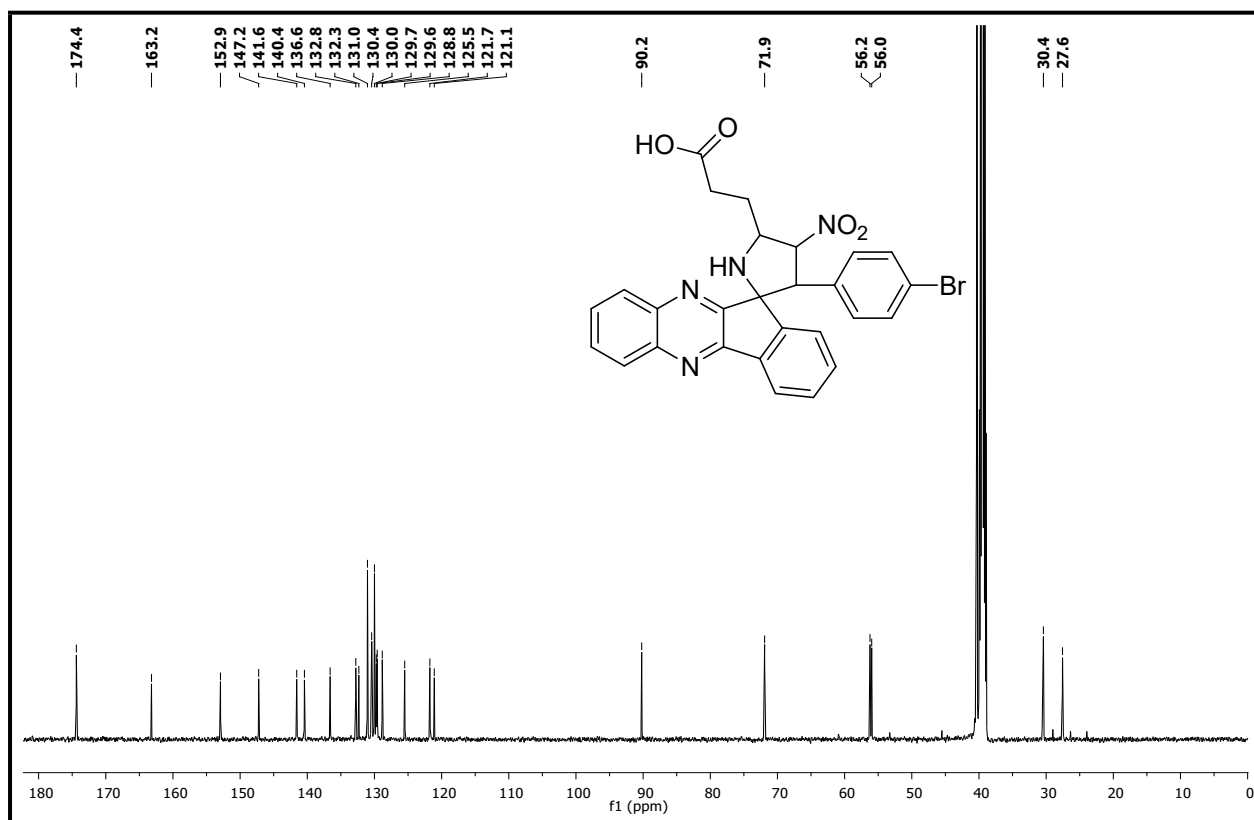

## ESIM Spectrum of compound 7f

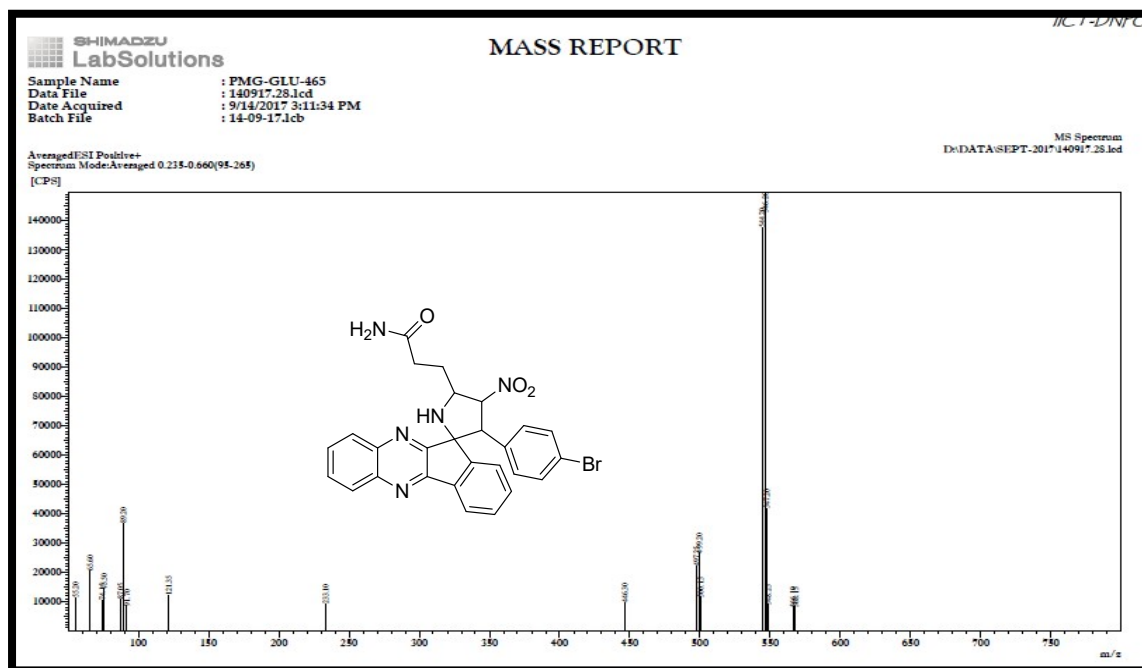

**Elemental Composition Report**

Page 1

**Single Mass Analysis**

Tolerance = 20.0 PPM / DBE: min = 1.0, max = 50.0  
 Element prediction: Off  
 Number of isotope peaks used for i-FIT = 3

Monoisotopic Mass, Even Electron Ions  
 65 formula(e) evaluated with 1 results within limits (up to 10 closest results for each mass)  
 Elements Used: C: 0-27 H: 0-25 N: 0-5 O: 0-5 Br: 0-1

PMG GLU 543  
 20170919\_10 6 (0.288) AM2 (Ar,22000.0,0.00,0.00); ABS; Cm (2:10-18:36)

19-Sep-2017 19:52:11  
 1: TOF MS ES+  
 9.40e+005

| m/z      | 544.0988   | 544.2347 | 545.1025 | 545.7654 | 546.0974 | 546.2590 | 547.1008 | 547.2247         | 547.7676 | 547.9371 |
|----------|------------|----------|----------|----------|----------|----------|----------|------------------|----------|----------|
| Minimum  | 5.0        | 20.0     | 1.0      |          |          |          |          |                  |          |          |
| Maximum  |            |          | 50.0     |          |          |          |          |                  |          |          |
| Mass     | Calc. Mass | mDa      | PPM      | DBE      | i-FIT    | Norm     | Conf (%) | Formula          |          |          |
| 544.0988 | 544.0984   | 0.4      | 0.7      | 18.5     | 68.9     | n/a      | n/a      | C27 H23 N5 O3 Br |          |          |

## IR Spectrum of compound 7f

NPL ICT  
FTIR REPORT

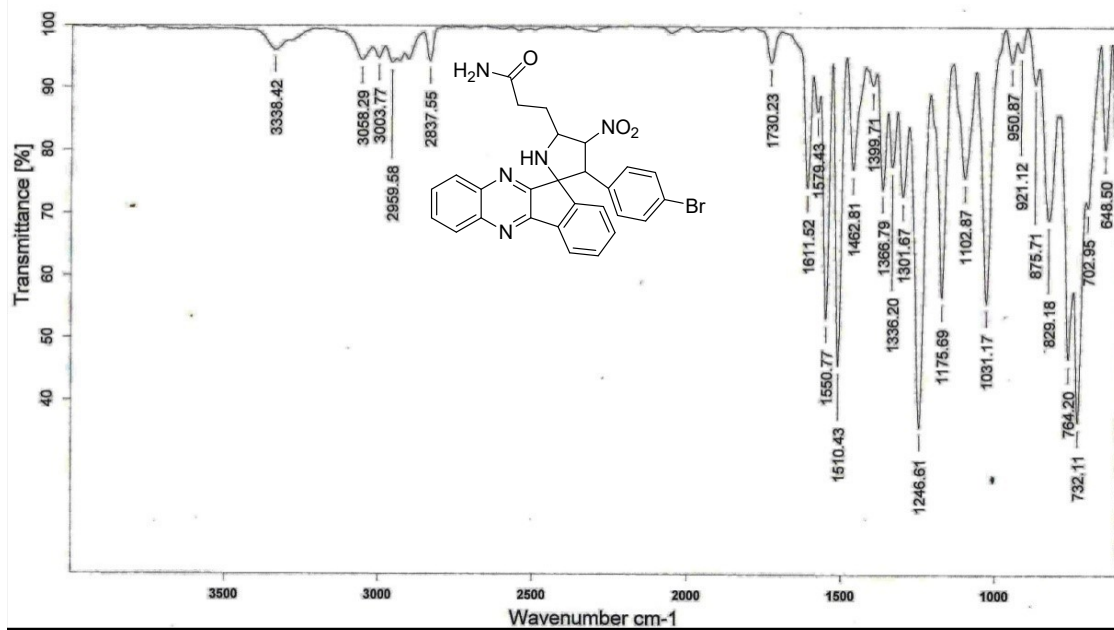

<sup>1</sup>H NMR Spectrum (CDCl<sub>3</sub>+CD<sub>3</sub>OD, 400 MHz) of compound 7f

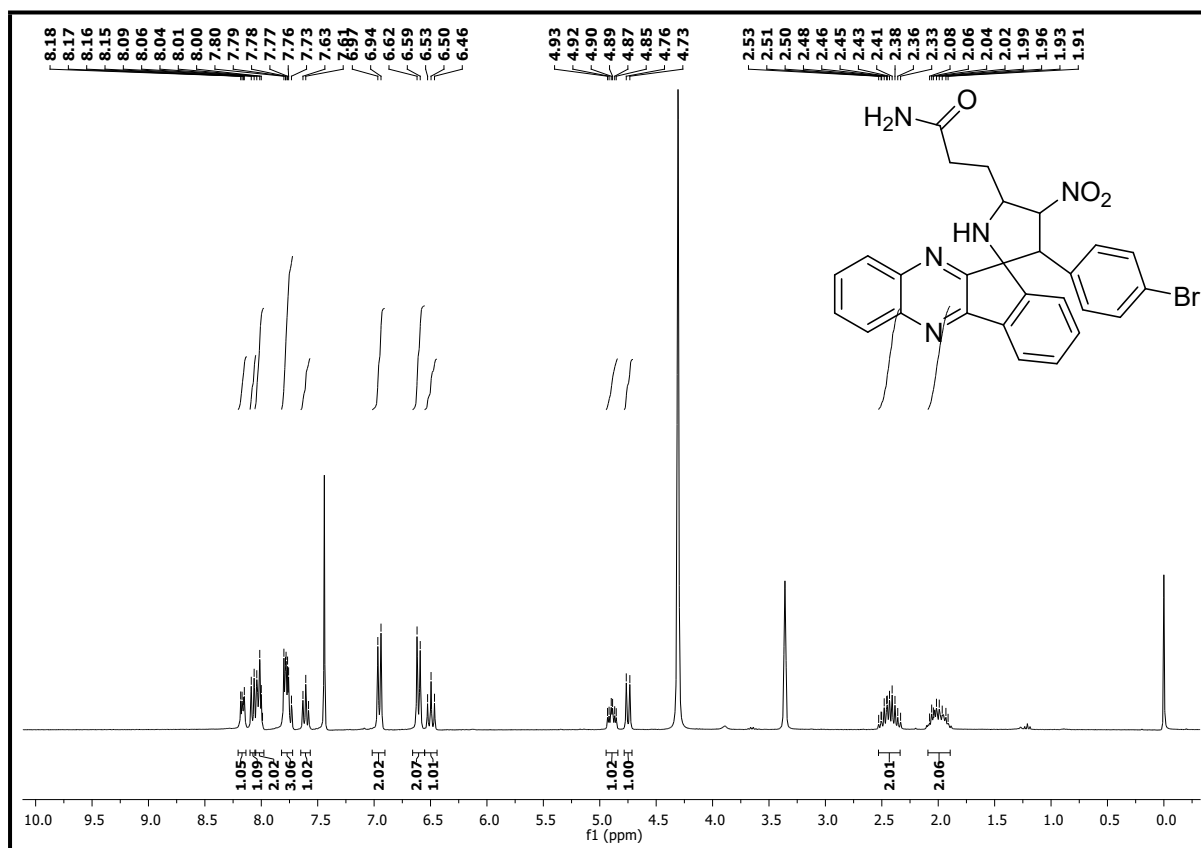

<sup>13</sup>C NMR Spectrum (CDCl<sub>3</sub>+CD<sub>3</sub>OD+DMSO-d<sub>6</sub>, 100 MHz) of compound 7f

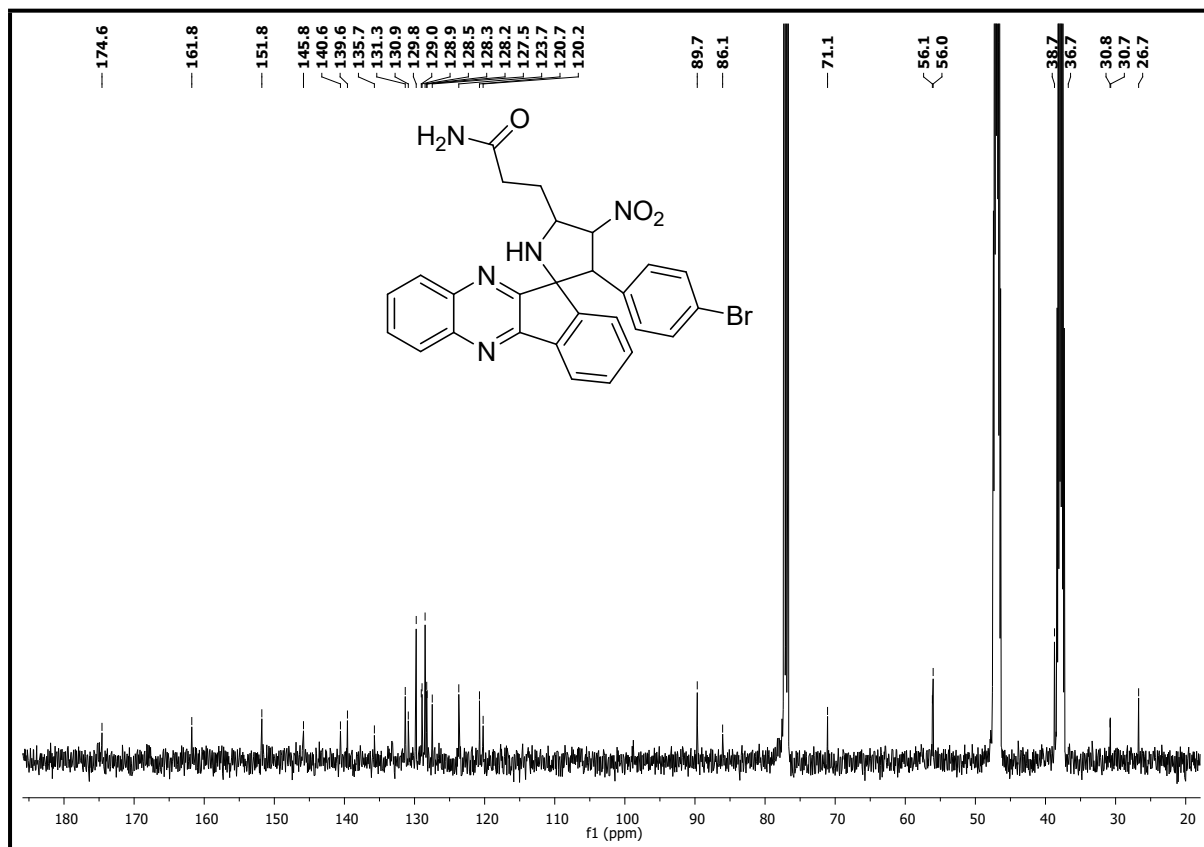

HR-ESIM Spectrum of compound 7g

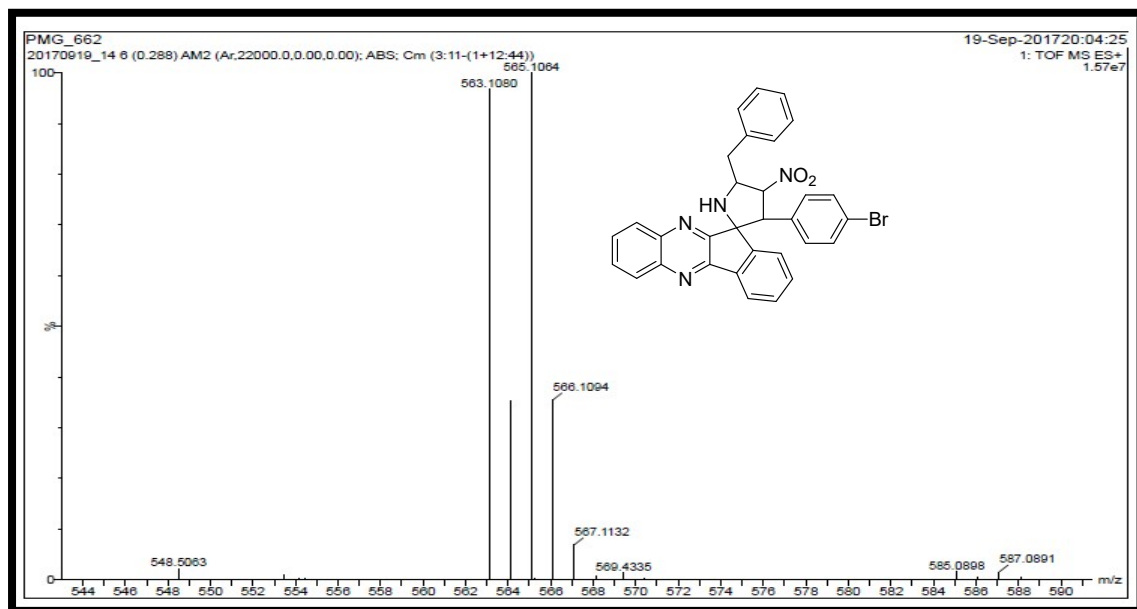

Elemental Composition Report

Page 1

Single Mass Analysis

Tolerance = 20.0 PPM / DBE: min = 1.0, max = 50.0  
 Element prediction: Off  
 Number of isotope peaks used for i-FIT = 3

Monoisotopic Mass, Even Electron Ions  
 64 formula(e) evaluated with 1 results within limits (up to 10 closest results for each mass)  
 Elements Used:  
 C: 0-31 H: 0-27 N: 0-5 O: 0-5 Br: 0-1

PMG\_662  
 20170919\_14 6 (0.288) AM2 (Ar,22000.0,0.00,0.00); ABS; Cm (3:11-(1+12:44))

19-Sep-201720:04:25  
 1: TOF MS ES+  
 1.57e+007

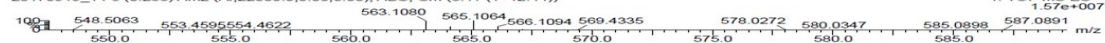

| Mass     | Calc. Mass | Mass mDa | PFM  | DBE  | i-FIT | Norm | Conf (%) | Formula          |
|----------|------------|----------|------|------|-------|------|----------|------------------|
| 563.1080 | 563.1083   | -0.3     | -0.5 | 21.5 | 67.9  | n/a  | n/a      | C31 H24 N4 O2 Br |

## IR Spectrum of compound 7g

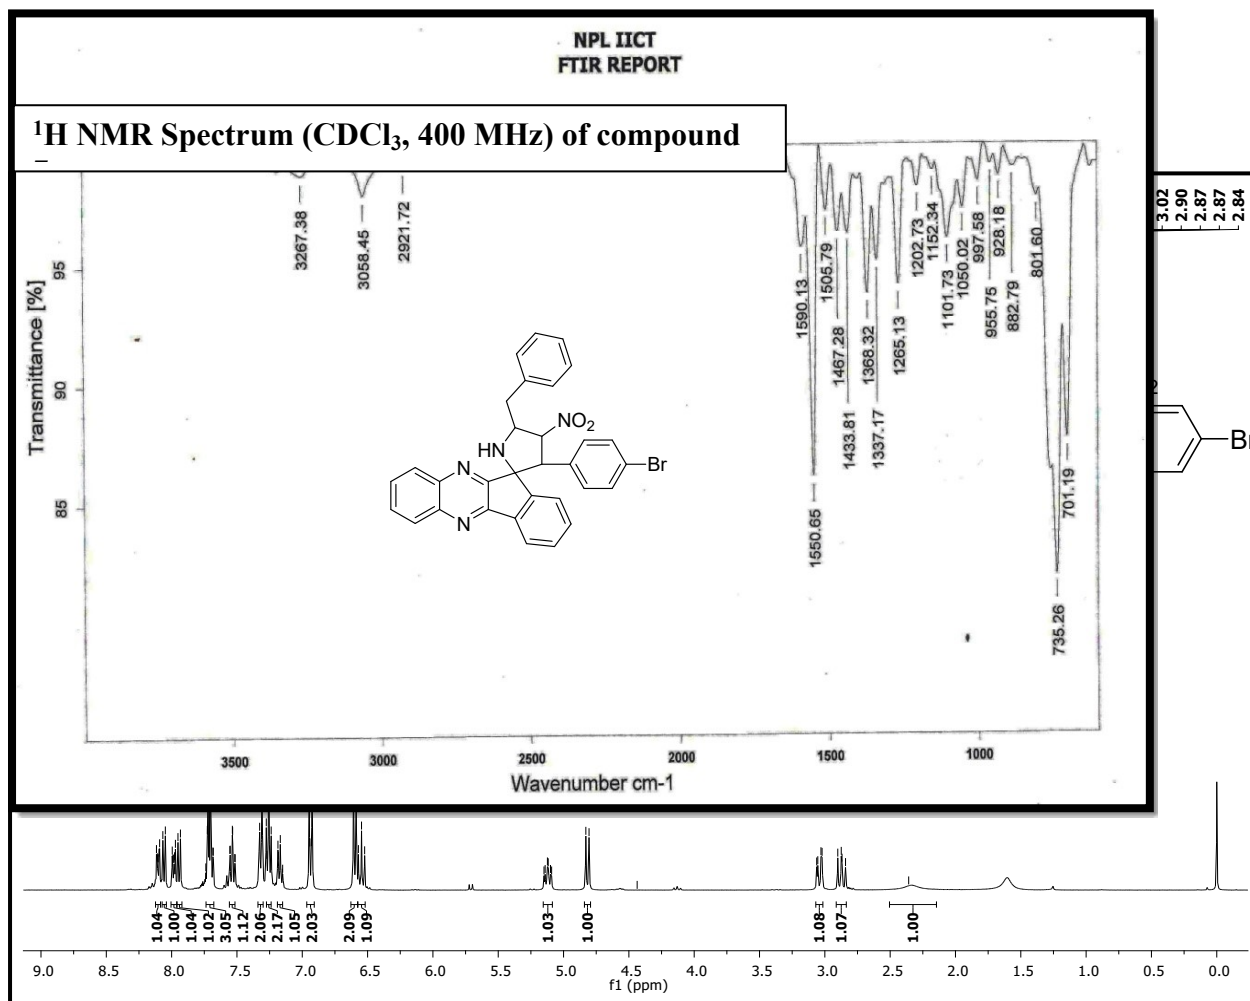

## <sup>13</sup>C NMR Spectrum (CDCl<sub>3</sub>, 100 MHz) of compound 7g

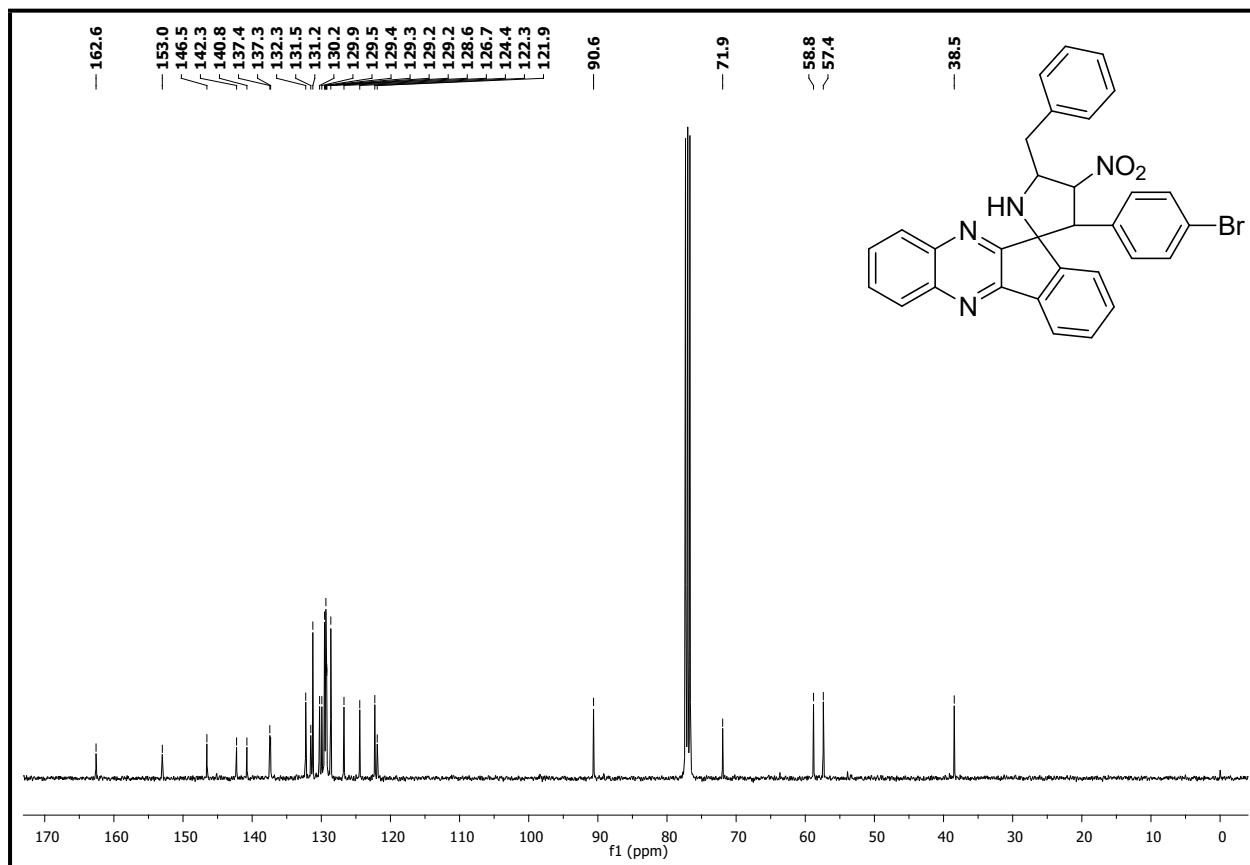

### HR-ESIM Spectrum of compound 7h

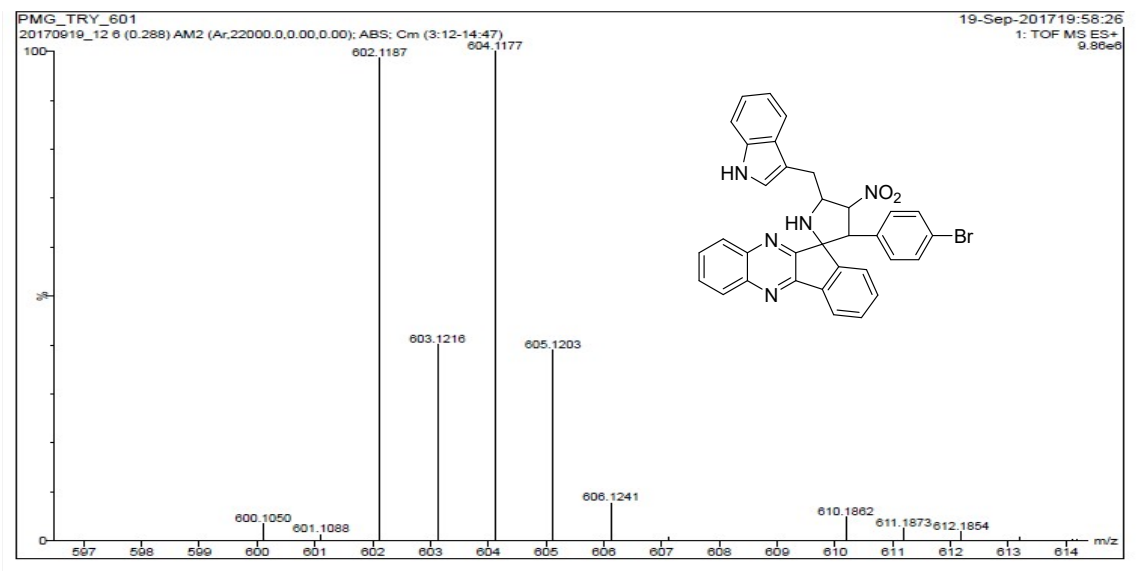

Elemental Composition Report

Single Mass Analysis

Tolerance = 20.0 PPM / DBE: min = 1.0, max = 50.0

Element prediction: Off

Number of isotope peaks used for I-FIT = 3

Monoisotopic Mass, Even Electron Ions

60 formula(e) evaluated with 1 results within limits (up to 10 closest results for each mass)

Elements Used:

C: 0-33 H: 0-25 N: 0-5 O: 0-5 Br: 0-1

PMG\_TRY\_601  
20170919\_12.6 (0.288) AM2 (Ar,22000.0,0.00,0.00); ABS; Cm (3:12-14:47)

19-Sep-2017 19:58:26

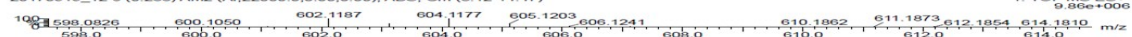

| Mass     | Calc. Mass | mDa  | PFM  | DBE  | i-FIT | Norm | Conf (%) | Formula          |
|----------|------------|------|------|------|-------|------|----------|------------------|
| 602.1187 | 602.1192   | -0.5 | -0.8 | 23.5 | 32.2  | n/a  | n/a      | C33 H25 N5 O2 Br |

IR Spectrum of compound 7h

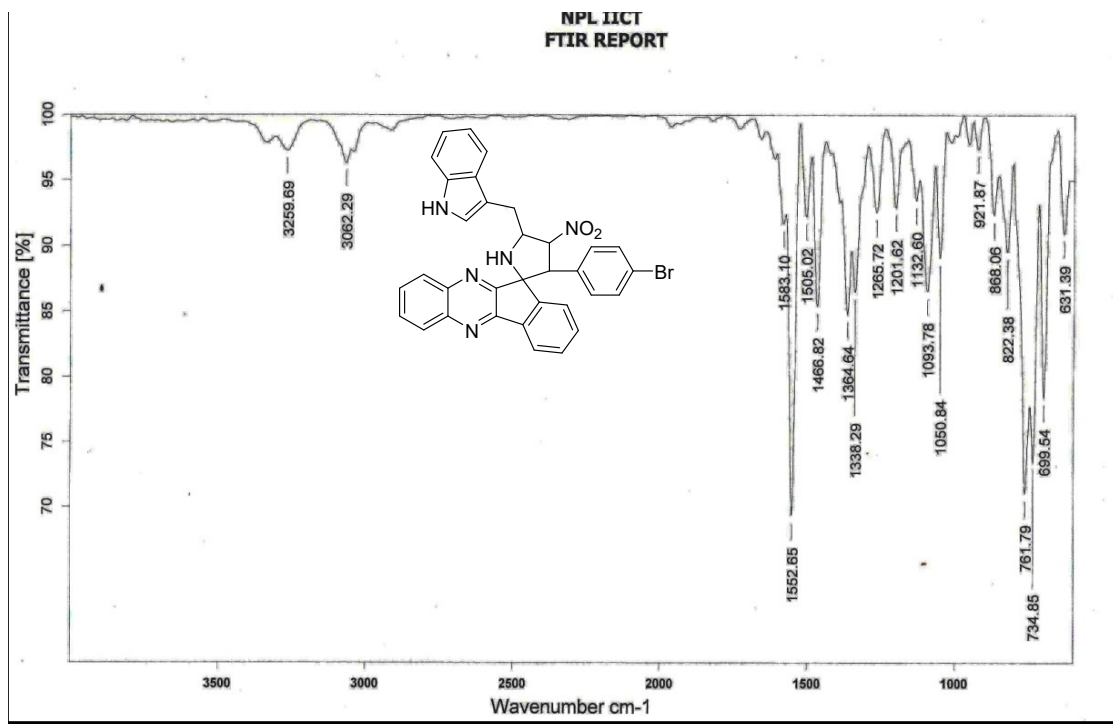

<sup>1</sup>H NMR Spectrum (CDCl<sub>3</sub>, 400 MHz) of compound 7h

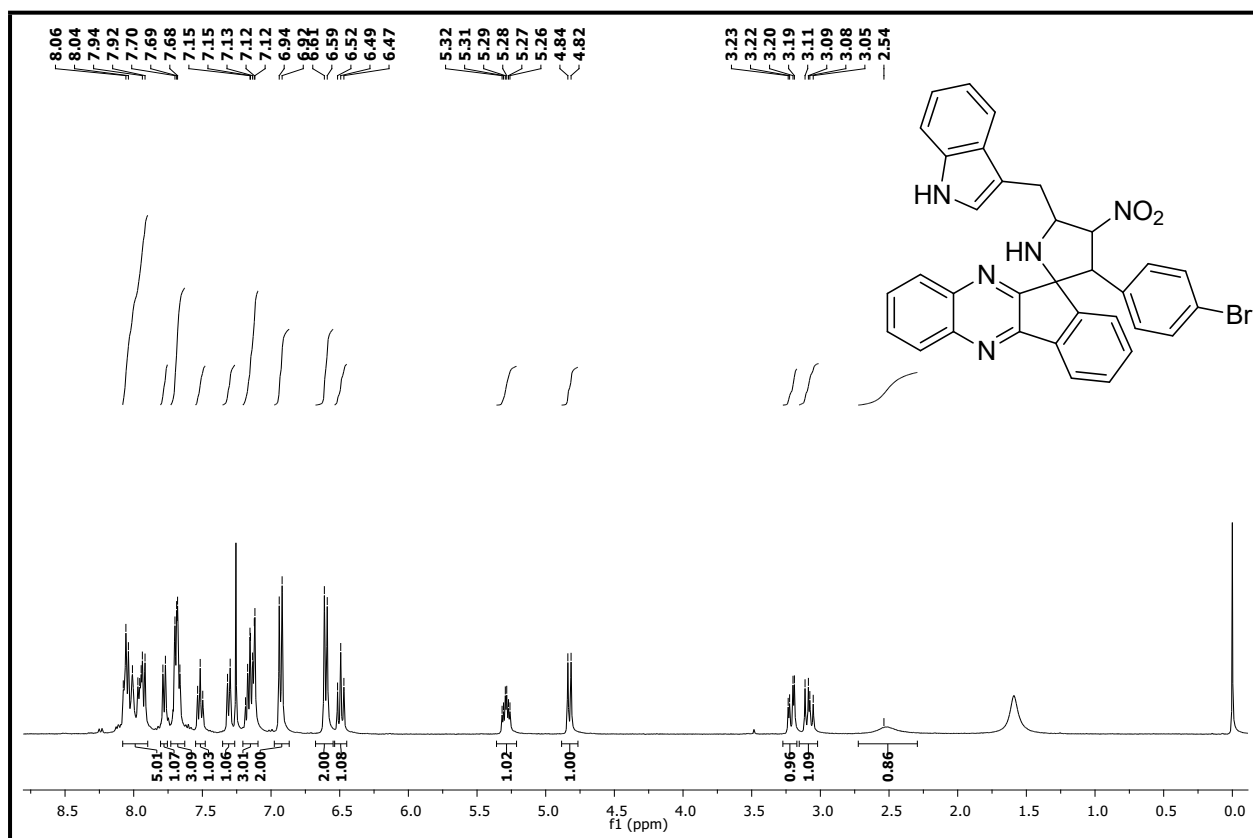

**<sup>13</sup>C NMR Spectrum (CDCl<sub>3</sub>, 100 MHz) of compound 7h**

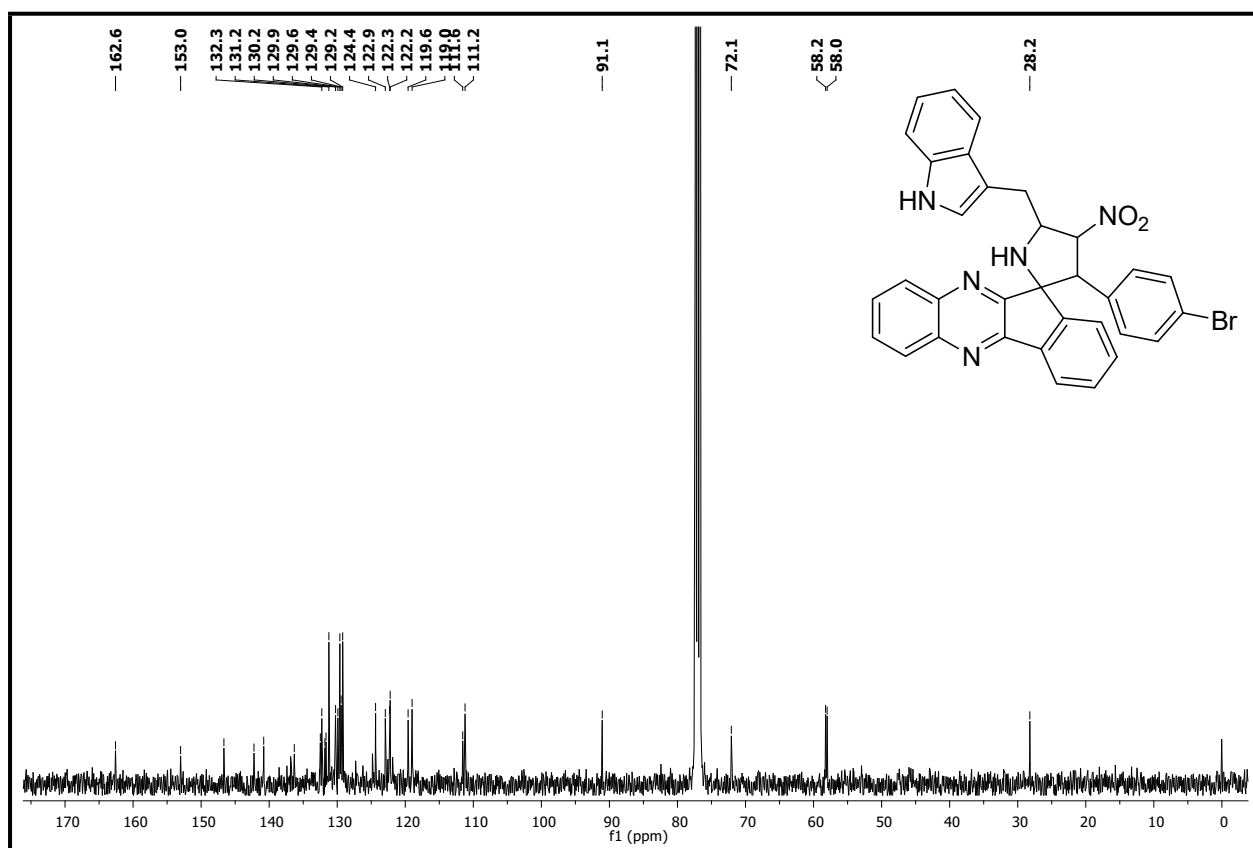

Supplement: d4ob00288a1.pdf [file d4ob00288a1.pdf]
